# Supplementary material for: Postmarketing studies for novel drugs approved by both the FDA and EMA between 2005 and 2010: a cross-sectional study
Source: PubMed Central journal article supplement — BMJ Open. 2017 Dec 21;7(12):e018587. doi: 10.1136/bmjopen-2017-018587 (PMC5778291; doi:10.1136/bmjopen-2017-018587), 2017-12-21
Supplement: bmjopen-2017-018587.draft_revisions.pdf [file bmjopen-2017-018587.draft_revisions.pdf]

# BMJ Open

BMJ Open is committed to open peer review. As part of this commitment we make the peer review history of every article we publish publicly available.

When an article is published we post the peer reviewers' comments and the authors' responses online. We also post the versions of the paper that were used during peer review. These are the versions that the peer review comments apply to.

The versions of the paper that follow are the versions that were submitted during the peer review process. They are not the versions of record or the final published versions. They should not be cited or distributed as the published version of this manuscript.

BMJ Open is an open access journal and the full, final, typeset and author-corrected version of record of the manuscript is available on our site with no access controls, subscription charges or pay-per-view fees (<http://bmjopen.bmj.com>).

If you have any questions on BMJ Open's open peer review process please email [editorial.bmjopen@bmj.com](mailto:editorial.bmjopen@bmj.com)

# BMJ Open

## Post-marketing trials for novel drugs approved by both the FDA and EMA between 2005 and 2010: a cross-sectional study

|                                 |                                                                                                                                                                                                                                                                                                                                                                                                                                                                                                                                                                                                             |
|---------------------------------|-------------------------------------------------------------------------------------------------------------------------------------------------------------------------------------------------------------------------------------------------------------------------------------------------------------------------------------------------------------------------------------------------------------------------------------------------------------------------------------------------------------------------------------------------------------------------------------------------------------|
| Journal:                        | <i>BMJ Open</i>                                                                                                                                                                                                                                                                                                                                                                                                                                                                                                                                                                                             |
| Manuscript ID                   | bmjopen-2017-018587                                                                                                                                                                                                                                                                                                                                                                                                                                                                                                                                                                                         |
| Article Type:                   | Research                                                                                                                                                                                                                                                                                                                                                                                                                                                                                                                                                                                                    |
| Date Submitted by the Author:   | 12-Jul-2017                                                                                                                                                                                                                                                                                                                                                                                                                                                                                                                                                                                                 |
| Complete List of Authors:       | Zeitoun, Jean-David; Hôtel Dieu Hospital, Epidémiologie Clinique; Saint-Antoine Hospital, Gastroenterology and Nutrition<br>Ross, Joseph; Yale University School of Medicine, Internal Medicine<br>Atal, Ignacio; Hotel Dieu Hospital, Epidémiologie Clinique<br>Vivot, Alexandre; Hotel Dieu Hospital, Epidémiologie Clinique<br>Downing, Nicholas; Brigham and Women's Hospital and Harvard Medical School, Medicine<br>Baron, Gabriel; INSERM U1153; Hôtel Dieu Hospital, Centre d'Epidémiologie Clinique<br>Ravaud, Philippe; Université Paris Descartes, Centre d'épidémiologie clinique; INSERM U1153 |
| <b>Primary Subject Heading</b>: | Pharmacology and therapeutics                                                                                                                                                                                                                                                                                                                                                                                                                                                                                                                                                                               |
| Secondary Subject Heading:      | Research methods, Public health                                                                                                                                                                                                                                                                                                                                                                                                                                                                                                                                                                             |
| Keywords:                       | THERAPEUTICS, STATISTICS & RESEARCH METHODS, EPIDEMIOLOGY                                                                                                                                                                                                                                                                                                                                                                                                                                                                                                                                                   |
|                                 |                                                                                                                                                                                                                                                                                                                                                                                                                                                                                                                                                                                                             |

SCHOLARONE™  
Manuscripts

1  
2  
3 **Post-marketing trials for novel drugs approved by both the FDA and EMA between**  
4  
5 **2005 and 2010: a cross-sectional study**  
6  
7

8 Jean-David Zeitoun, MD, MHPM, PhD candidate <sup>1,2,3</sup>, Joseph S. Ross, MD, MHS <sup>4,5,6,7</sup>,  
9  
10 Ignacio Atal, MSc <sup>1,8</sup>, Alexandre Vivot <sup>1,8</sup>, Nicholas S. Downing, MD <sup>9</sup>, Gabriel Baron, PhD  
11  
12 <sup>1,8,10</sup>, Philippe Ravaud, MD, PhD <sup>1,8,10,11</sup>  
13

- 14  
15 
- 16 1. Centre d'Épidémiologie Clinique, Hôpital Hôtel Dieu, Assistance Publique-Hôpitaux  
17 de Paris, Paris, France
  - 18 2. Gastroenterology and Nutrition, Hôpital Saint-Antoine, Assistance Publiques-  
19 Hôpitaux de Paris, Paris, France
  - 20 3. Proctology, Groupe Hospitalier Diaconesses-Croix Saint-Simon, Paris, France
  - 21 4. Department of Internal Medicine, Robert Wood Johnson Foundation Clinical Scholars  
22 Program, Yale School of Medicine, New Haven, Connecticut, USA
  - 23 5. Department of Internal Medicine, Section of General Internal Medicine, Yale School  
24 of Medicine, New Haven, Connecticut, USA
  - 25 6. Department of Health Policy and Management, Yale School of Public Health, New  
26 Haven, Connecticut, USA
  - 27 7. Center for Outcomes Research and Evaluation, Yale-New Haven Hospital, New  
28 Haven, Connecticut, USA
  - 29 8. INSERM UMR 1153, Centre de Recherche Épidémiologie et Statistique Paris  
30 Sorbonne Cité (CRESS), METHODS Team, Paris, France
  - 31 9. Department of Medicine, Brigham and Women's Hospital and Harvard Medical  
32 School, Boston, Massachusetts
  - 33 10. Université Paris Descartes, Sorbonne Paris Cité, Paris, France
  - 34 11. Department of Epidemiology, Columbia University Mailman School of Public Health,  
35 New York, New York, United States of America.
- 36  
37  
38  
39  
40  
41  
42  
43  
44  
45  
46  
47  
48  
49  
50  
51  
52  
53  
54  
55  
56  
57  
58  
59  
60

1  
2  
3 **Corresponding author:** Dr. Jean-David Zeitoun, MD, MHPM, PhD candidate, Centre  
4  
5 d'Epidémiologie Clinique, Hôpital Hôtel Dieu, Assistance Publique-Hôpitaux de Paris, Paris,  
6  
7 France. E-mail: [jdzeitoun@yahoo.fr](mailto:jdzeitoun@yahoo.fr)  
8

9 **Word count:** 3520

10  
11 **Abstract:** 300

12  
13 **References:** 25

14  
15 **Figures:** 3

16  
17  
18 **Tables:** 2  
19  
20  
21  
22  
23  
24  
25  
26  
27  
28  
29  
30  
31  
32  
33  
34  
35  
36  
37  
38  
39  
40  
41  
42  
43  
44  
45  
46  
47  
48  
49  
50  
51  
52  
53  
54  
55

56 **ABSTRACT**  
57  
58  
59  
60

1  
2  
3 **Objectives:** To characterize post-marketing trials for drugs that were newly approved by the  
4  
5 U.S. Food and Drug Administration (FDA) and the European Medicines Agency (EMA).  
6  
7

8 **Design and Setting:** Cross-sectional analysis of post-marketing trials registered in  
9  
10 ClinicalTrials.gov until September 2014 for all novel drugs approved by both regulators  
11  
12 between 2005 and 2010. Regulatory documents from both agencies were also used.  
13  
14

15 **Primary and secondary outcome measures:** All identified post-marketing trials were  
16  
17 classified according to the following features: planned enrolment, funding, status,  
18  
19 geographical location. We also determined whether trials studied the originally-approved  
20  
21 indication.  
22  
23

24  
25 **Results:** There were 69 novel drugs approved between 2005 and 2010 that were eligible for  
26  
27 inclusion. A total of 6679 relevant post-marketing trials were identified. Median values of the  
28  
29 number of trials per drug was 55 (interquartile range [IQR]: 33-119) and of the number of  
30  
31 patients to be enrolled per trial was 60 (IQR, 28-183). Industry was the primary sponsor of  
32  
33 2713 trials (40.6%) and involved as a primary or secondary sponsor in 4176 trials (62.5%).  
34  
35 We found that 2901 trials (43.4%) were completed, 487 (7.3%) terminated, 1013 (15.2%)  
36  
37 were active yet not recruiting, 1895 (28.4%) recruiting, and 319 (4.8%) not yet recruiting.  
38  
39 Geographical data showed that 80% of post-marketing trials were conducted in only one  
40  
41 country and 84.4% of trials took place in Europe and (or) North America. We found that 2561  
42  
43 post-marketing trials (38.3%) studied another indication than the originally-approved  
44  
45 indication. Trials for which industry was a funder were less likely to assess the drug in  
46  
47 another indication (54.6% vs. 68.6%;  $p < 0.0001$ ).  
48  
49  
50  
51

52 **Conclusions:** Post-marketing pharmaceutical research was found to be highly variable among  
53  
54 drugs, predominantly located in North America and Europe. Post-marketing trials were  
55  
56 frequently designed to study other indications than the originally-approved one. Although  
57  
58  
59  
60

1  
2  
3 some findings were reassuring, others question the lack of coordination of post-marketing  
4  
5 research.  
6  
7  
8  
9

### 10 11 **Strengths and limitations of this study** 12

13  
14 This is the first study to systematically assess clinical trials performed after marketing  
15 approval by the two leading regulators, namely the US Food and Drug Administration (FDA)  
16 and the European Medicines Agency (EMA).  
17  
18  
19

20  
21 This approach allowed us to examine a substantial number of post-marketing trials over a  
22 long time period.  
23  
24

25  
26 However and due to registration bias, we cannot exclude that some true post-marketing trials  
27 were missed and therefore unanalyzed.  
28  
29  
30  
31  
32  
33  
34

35 **Funding:** This research received no specific grant from any funding agency in the public,  
36 commercial or not-for-profit sectors.  
37  
38  
39

40 **Competing interests:** Dr. Zeitoun reports that he serves as an advisor for several consulting  
41 firms and communication companies linked with the pharmaceutical industry (Cepton, Oliver  
42 Wyman, Roland Berger, McCann Healthcare, Omnicom, Grey Healthcare, Saatchi and  
43 Saatchi Healthcare, Sudler& Hennessey, TBWA, inVentiv Health France, Havas). He also  
44 reports compensation for lectures given to manufacturer professional associations;  
45 collaboration with Mayoly-Spindler, Merck, Teva, Johnson & Johnson, and Menarini; unpaid  
46 consultancy for EY; conducting workshops funded by Amgen; and being invited to a French  
47 medical congress by AbbVie. Dr. Ross receives support through Yale University from  
48  
49  
50  
51  
52  
53  
54  
55  
56  
57  
58  
59  
60

1  
2  
3 Johnson and Johnson to develop methods of clinical trial data-sharing; from the Centers of  
4  
5 Medicare and Medicaid Services (CMS) to develop and maintain performance measures that  
6  
7 are used for public reporting; from Medtronic, Inc. and the US FDA to develop methods for  
8  
9 post-market surveillance of medical devices; from the Blue Cross Blue Shield Association to  
10  
11 better understand medical technology evaluation; and from the Laura and John Arnold  
12  
13 Foundation to support the Collaboration on Research Integrity and Transparency (CRIT) at  
14  
15 Yale.  
16  
17  
18  
19  
20  
21  
22  
23  
24  
25  
26  
27  
28  
29  
30  
31  
32  
33  
34  
35  
36  
37  
38  
39  
40  
41  
42  
43  
44  
45  
46  
47  
48  
49  
50  
51  
52  
53  
54  
55  
56  
57  
58  
59  
60

## Introduction

The US Food and Drug Administration (FDA) and the European Medicines Agency (EMA) are the two largest and most influential drug regulators worldwide. They tend to maintain similar premarket regulatory standards, and drug manufacturers likely submit the same evidence to both as part of the premarket application process. Drug evaluation continues after regulatory approval, in particular through post-authorization requirements and commitments. Yet these post-marketing clinical studies are limited in number and are not consistently completed. [1–3] This situation raises the question of whether other trials of these drugs after regulatory approval, including those conducted by industry and independent investigators, but not to fulfill regulatory requirements, should be considered part of ongoing, continuous evaluation efforts.

Post-marketing trials are designed with different intent than are premarket trials. Their designs are not systematically submitted to regulatory agencies before initiation because many post-marketing trials are conducted by independent investigators, and their conduct is less rigorously regulated. [4] Post-marketing trials seek to evaluate safety regarding rare events, to assess the real-life effectiveness of novel drugs and to measure their long-term effects. They also permit drug evaluation in different populations, other indications for the same disease, other diseases or with different delivery systems or dosage forms. Moreover, although premarket trials are nearly exclusively sponsored by the manufacturers, post-marketing trials can be funded by manufacturers but also academic or other types of non-profit institutions.

Nevertheless, post-marketing trials have considerable influence on all stakeholders, in particular researchers, practitioners and regulators or decision makers, because they provide cumulative evidence regarding marketed products. However, we lack an overall assessment of post-marketing trials regarding novel drugs. Post-marketing research has been studied for



1  
2  
3 high-risk devices [5] or even for drugs, but with a focused approach: safety [6,7] or given  
4  
5 therapeutic areas. [8–11] Some of those studies produced reassuring results, yet others showed  
6  
7 inconsistencies, with gaps in knowledge regarding some issues.  
8  
9

10  
11 Our research objective was to provide a comprehensive description of post-marketing  
12  
13 trials registered in ClinicalTrials.gov, a publicly-accessible clinical trial registry maintained  
14  
15 by the US National Institutes of Health over almost a decade for a sample of drugs approved  
16  
17 by both the FDA and EMA from 2005 to 2010. We aimed to characterize the total number of  
18  
19 trials and patients studied, the geographical location of trials and their status (e.g., completed  
20  
21 or ongoing). We also sought to examine differences between the initial label and the specific  
22  
23 clinical condition studied in the post-marketing trials.  
24  
25  
26  
27  
28  
29

## 30 **Methods**

### 31 *Data sources and study sample*

32  
33 We identified all novel drugs approved between January 1, 2005 and December 31, 2010 by  
34  
35 both the FDA and EMA through its Centralized Authorization Procedure. For the FDA,  
36  
37 Drugs@FDA is a publicly accessible database listing relevant regulatory actions for all  
38  
39 approved drugs. [12] For the EMA, information was accessible in the European Public  
40  
41 Assessment Reports, which provide a summary of scientific review and list notable regulatory  
42  
43 events for all drug submissions.[13] Studies of generic drugs, reformulations, combination  
44  
45 therapies and non-therapeutic agents such as radiographic dye were not included. This first  
46  
47 search led to a sample of 71 novel drugs approved by both regulators between 2005 and 2010.  
48  
49 Two drugs, everolimus and temsirolimus, were excluded because they were associated with  
50  
51 an abnormally high number of post-marketing trials involving drug-eluting stents.  
52  
53  
54  
55  
56  
57  
58  
59  
60

### *Drug and manufacturer characteristics*

The following data were retrieved for each drug: agent type (small molecule or biologic), dates of regulatory submissions for both the FDA and EMA, orphan status according to the FDA, orphan designation from the EMA, therapeutic class according to the Anatomical Therapeutic Chemical code, [14] initial label from both regulators, degree of novelty (first-in-class, advance-in-class, addition-to-class) as previously described in a paper from FDA officials [15] and size of the marketing-authorization holder (i.e., manufacturer). This latter information was obtained by personal communication with EMA officials (Dr. Constantinos Ziogas, Small and Medium-sized Manufacturer Office, EMA), who classified manufacturers as large pharmaceutical companies, intermediated-size companies or small- and medium-size companies according to the European Union definition based on headcount and financial turnover or balance sheet total.

### *Preapproval FDA pivotal trial characteristics*

We obtained data for the expected length of treatment and number of patients from pivotal efficacy trials supporting FDA approvals that had been collected for a previous work. [16]

### *Post-marketing trials*

On September 24, 2014, we extracted all trials that were registered at ClinicalTrials.gov for each drug of our sample, regardless of dates and other details. We then excluded trials with the following characteristics: included in the FDA regulatory submission (by a manual review of Drugs@FDA), with inadequate registered status (expanded-access trials, withdrawn trials, suspended trials), and mistakenly extracted (i.e., trials actually not assessing the drug of interest). We decided that all trials whose starting date had preceded the first regulatory submission (to the FDA or EMA) by 1 year or less would be classified as post-marketing trials. Trials that pertained to more than one drug in our sample were manually reviewed so as

1  
2  
3 to assign them to only one drug for the sake of further statistical analysis. Clinical judgment  
4  
5 was applied to choose the “leading” drug in each trial. When we could not determine the  
6  
7 leading drug, we used the following rules. If the trial was funded by a marketing-authorization  
8  
9 holder of one of the drugs, this drug was considered the leading drug. Otherwise, if the trial  
10  
11 involved a drug that was assessed for another indication than the originally approved  
12  
13 indication, this drug was considered the leading drug. Finally, when no leading drug could be  
14  
15 determined, the drug for which the last regulatory approval had been granted was considered  
16  
17 the drug tested and was classified as the leading drug.  
18  
19

20  
21 For all remaining post-marketing trials, the following data were collected: condition  
22  
23 studied, starting date, study sponsors (as a primary sponsor or a collaborator), status at the  
24  
25 date of extraction (not yet recruiting, recruiting, active yet not recruiting, enrolling by  
26  
27 invitation, completed, terminated), number and list of countries, number of centers, trial  
28  
29 phase, study type (observational or interventional), randomization, and planned enrollment. In  
30  
31 addition, trials were classified as assessing the drug for its originally approved indication or  
32  
33 not, depending on the initial label. When the initial label differed between the FDA and EMA,  
34  
35 we accepted both labels as defining the originally approved indication. One of us (JDZ)  
36  
37 performed this classification after careful review of each primary label.  
38  
39

#### 40 41 *Supplemental indications*

42  
43 We also collected approvals of supplemental indications by the FDA during the study period  
44  
45 (2005-2014) by manual review of Drugs@FDA. In the “Approval date(s) and History,  
46  
47 Letters, Labels, Reviews” section, all events designated as “efficacy-new indication” or  
48  
49 “efficacy” were reviewed and retained if deemed appropriate. Labeling revision (such as those  
50  
51 related to a modified indication or an expanded patient population) and manufacturing change  
52  
53 or addition were not included, nor were irrelevant supplemental indications. We also aimed to  
54  
55 assess the average number of patients to be enrolled in post-marketing trials to gain approval  
56  
57  
58  
59  
60

1  
2  
3 of a supplemental indication. For this purpose, we took into account all patients from all post-  
4  
5 marketing trials from the start of our sample through 1 year before the issuance of the  
6  
7 supplemental indication by the FDA.  
8

### 9 10 *Statistical analysis*

11 Using descriptive statistics, we characterized the premarket characteristics of the novel drugs  
12  
13 included in our sample (drugs approved by both the FDA and EMA between 2005 and 2010).  
14  
15 Next, we used descriptive statistics to characterize features of all identified post-marketing  
16  
17 trials registered at ClinicalTrials.gov for all novel drugs. We used a series of trend charts  
18  
19 representing the annual number of post-marketing trials over the life-cycle of the drugs  
20  
21 according to off- and on-condition trials. All statistical tests were two-tailed, with a type I  
22  
23 error rate of 0.05. We used SAS 9.4 (SAS Institute; Cary, NC) for all statistical analyses.  
24  
25  
26  
27  
28  
29  
30  
31

## 32 **Results**

### 33 34 *Drug sample*

35  
36 Our study sample included 69 novel drugs approved between 2005 and 2010 by both the FDA  
37  
38 and EMA. In all, 51 drugs (73.9%) were small molecules and 18 (26.1%) were biologics  
39  
40 (Table 1). The FDA had granted orphan status to 18 drugs (26.1%) and the EMA an orphan  
41  
42 designation to 20 (29.0%). Among these 69 novel drugs, 24 (34.8%) were first-in-class, 24  
43  
44 (34.8%) advance-in-class and 21 (30.4%) addition-to-class. The most prevalent therapeutic  
45  
46 category was antineoplastic and immunomodulating agents (29% of all novel drugs from the  
47  
48 sample) and many drugs (68.1%) were for chronic treatment. The manufacturer was a large  
49  
50 pharmaceutical company for 44 (63.8%) of the drugs. Other details are in Table 1.  
51  
52  
53  
54  
55  
56  
57  
58  
59  
60

1  
2  
3 *Number of post-marketing trials, status and patients recruited*  
4  
5

6 Sequential exclusions leading to our final study sample of 6679 relevant post-marketing trials  
7 related to all 69 novel drugs are in Supplemental Material (S1). Characteristics of all post-  
8 marketing trials are in Table 2. In all, 2901 trials (43.4%) were completed, 487 (7.3%)  
9 terminated, 1013 (15.2%) active yet not recruiting, 1895 (28.4%) recruiting, and 319 (4.8%)  
10 not yet recruiting. When comparing respective numbers of post-marketing trials and all  
11 clinical trials (preapproval trials and post-marketing trials), the median proportion of post-  
12 marketing trials per drug was 0.91 (interquartile range [IQR] 0.88-0.96). However, we found  
13 high variability in number of post-marketing trials per drug, with a median of 55 trials per  
14 drug (IQR, 33-119) and mean of 96.8 trials per drug (SD 110.3). Galsulfase, an orphan  
15 medication indicated for Mucopolysaccharidosis VI, was associated with the lowest number  
16 of post-marketing trials (n=3) and sorafenib, a tyrosine kinase inhibitor initially indicated for  
17 kidney cancer, with the highest number of post-marketing trials (n=530).  
18  
19  
20  
21  
22  
23  
24  
25  
26  
27  
28  
29  
30  
31  
32

33 Planned enrollment was also highly variable, with trials only including one patient, and one  
34 trial intending to recruit 904 585 patients (actually a prospective population-based cohort  
35 study examining risk of congenital malformations after use of varenicline, a tobacco-use  
36 cessation drug, in pregnant women). However, the median number of patients to be enrolled  
37 per trial was 60 (IQR 28-183). Data on the total population to be enrolled in all post-  
38 marketing trials for a given drug was also highly varied, with a median total sample of 15 418  
39 patients (IQR 4932-37 523). Velaglucerase alfa, an orphan medication indicated for Gaucher  
40 disease, was associated with the lowest population size to be included in trials (n=67), and  
41 varenicline was associated with the greatest population to be enrolled (>1 million patients  
42 overall). Supplemental Material (S2) shows the total number of patients to be included in  
43 post-marketing trials for each drug and proportions of industry and non-industry funders.  
44  
45  
46  
47  
48  
49  
50  
51  
52  
53  
54  
55  
56  
57  
58  
59  
60

1  
2  
3 Supplemental Material (S3) presents for each drug the number of patients included in  
4  
5 preapproval trials as compared with post-marketing trials. The median proportion for the  
6  
7 population recruited in post-marketing trials to the total population (i.e., preapproval samples  
8  
9 and post-marketing trials) was 0.92 (IQR 0.85-0.96). Again, alglucidase and velaglucerase  
10  
11 alfa were associated with the lowest number of patients in preapproval trials. In contrast, for  
12  
13 dabigatran, a drug initially indicated for preventing venous thromboembolism in the European  
14  
15 Union and to reduce the risk of stroke and systemic embolism in patients with non-valvular  
16  
17 atrial fibrillation in the United States, preapproval trials had recruited the highest number of  
18  
19 patients. The same figure also shows the proportions of patients enrolled in post-marketing  
20  
21 trials designed for the originally approved indication, another indication and both.  
22  
23

#### 24 25 26 *Trial characteristics*

27  
28  
29 Data regarding study phases are shown in Table 2; only 18.6% of identified post-marketing  
30  
31 trials were considered phase IV trials, whereas the most prevalent category was phase II trials  
32  
33 (32.6%). Data regarding randomization were missing for 2452 post-marketing trials (36.7%).  
34  
35 Among the remaining trials for which these data were available, 3067 were randomized  
36  
37 (72.6%). Other data are in Table 2.  
38  
39

#### 40 41 *Sponsor*

42  
43  
44 Industry funded or partially funded nearly two-thirds of post-marketing trials. Indeed, as  
45  
46 shown in Table 2, industry was the primary sponsor of 2713 trials (40.6%), but when also  
47  
48 considering manufacturers as minority funders, industry was involved in a total of 4176 trials  
49  
50 (62.5%). Data regarding post-marketing trials stratified by sponsorship are in Table 2. Figure  
51  
52 1 presents the drug sample with respect to the number of post-marketing trials and the  
53  
54 proportion of industry and non-industry funders for each drug. Supplemental Material (S4)  
55  
56 provides the same information but with a 4-year follow-up for each drug.  
57  
58  
59  
60

### *Conditions addressed in trials*

Review of indications showed that 2441 post-marketing trials (36.5%) were launched for another indication than the originally approved indication. Figure 2 displays the number of non-approved indications studied in post-marketing trials for each drug of our sample, with information regarding the more advanced phase for each newly targeted indication. When comparing those trials with the total number of clinical trials (preapproval trials and post-marketing trials), we found a median proportion of 0.24 (IQR, 0.09-0.42). The median proportion for the population recruited in post-marketing trials designed for another indication than the originally approved indication to the total population from all clinical trials (preapproval trials and post-marketing trials) was 0.11 (IQR 0.03-0.30).

When analyzing the relationship between the trial sponsor and the trial indication, we found that trials for which industry was a sole or partial funder were less likely to assess the drug for another indication than the originally approved indication (54.6% of trials with industry funding vs 68.6% without industry funding;  $p < 0.0001$ ). Findings regarding planned enrollment according to the indication and stratified on funding origin are in Supplemental Material (eTable). Regardless of the funder, post-marketing trials targeting originally approved indications planned to enroll more patients than those studying other indications.

### *Timing*

The annual number of post-marketing trials over the life-cycle of drugs, stratified by indication, is shown in Figure 3, exhibiting an asymmetric bell pattern, with a rapid increase in number of post-marketing trials launched, a peak of activity within the third year after the first regulatory submission, then a progressive decline in number of launched trials. Detailed examination shows a greater proportion of trials designed for another indication than the originally approved indication at the beginning and end of drug life-cycles. Supplemental

1  
2  
3 Material (S5) is based on the same data but displays information regarding sponsors. Former  
4  
5 post-marketing trials were predominantly funded by industry versus academic or not-for-  
6  
7 profit entities and this proportion increased until the second year after the first regulatory  
8  
9 submission. Afterwards, the proportion of non-industry funders tended to increase over time.  
10

### 11 12 *Location*

13  
14  
15 Overall, 80% of post-marketing trials were conducted in only one country. For 66 drugs, at  
16  
17 least one trial was conducted in at least two countries. Sorafenib was the most concerned drug  
18  
19 in this regard, with 74 trials involving at least two countries. Data regarding locations of trials  
20  
21 for each drug are in Supplemental Material (S6). In brief, post-marketing research was highly  
22  
23 concentrated in North America (i.e., United States and/or Canada; 44.8% of all post-  
24  
25 marketing trials of the sample) and Europe (25.0%). Post-marketing trials conducted in other  
26  
27 areas represented 15.6% of all trials, and trials conducted in multiple continents were few.  
28

29  
30  
31 When examining the relation between trial location and study design with respect to the  
32  
33 original label, we found that trials from North America (United States and/or Canada) were  
34  
35 more frequently conducted for indications other than the originally approved indication versus  
36  
37 those located in Europe (50.4% v. 36.9%).  
38

### 39 40 41 *Supplemental indications*

42  
43  
44 During the study period, 18 novel drugs (26.1%) were associated with a least a supplemental  
45  
46 indication by the FDA: one with 4 supplemental indications, one with 3 supplemental  
47  
48 indications, 5 with two supplemental indications and 11 with one supplemental indication.  
49

50  
51 The mean time between the first regulatory submission and subsequent supplemental  
52  
53 indication was 4.4 years (SD 1.7; IQR 3.3-5.7). The mean number of patients to be enrolled in  
54  
55 post-marketing trials before approval of a supplemental indication was 12763.1 (SD 12474.3;  
56  
57 IQR 3891.0-15856.0).  
58  
59  
60



## Discussion

In our study of post-marketing clinical research studies conducted for novel drugs approved by both the FDA and EMA between 2005 and 2010, we found high variability in number of post-marketing trials per drug and planned enrollment per trial. Indeed, the median planned enrollment was low, 60 patients, with a median of 55 trials per drug, most of which had not yet been completed at a minimum of 4 years after approval. Locations were concentrated, with 72.3% of post-marketing trials conducted in North America and/or Europe and 80% conducted in only one country. Approximately 40% of post-marketing trials were designed for an indication other than the originally approved one, more frequently concerning trials not involving industry funding. Overall, those findings reflect the lack of global coordination of post-marketing research for novel drugs.

Our study has several strengths. First, we focused on a sample of drugs approved by the two leading medical product regulators, FDA and EMA, which suggests that these drugs are likely to be of the greatest interest and importance to clinicians worldwide. Most previous studies focused on the FDA or EMA but rarely both. [16,17] Second, few comprehensive studies have analyzed post-marketing research despite its undisputed public health impact. Most research focused on safety or was limited to a given therapeutic area, or even only one drug. In addition, we chose a large study period, with a 6-year span for drug approvals, and nearly 10 years for the trial sample. Moreover, we followed a rigorous method for selecting post-marketing trials, excluding clinical trials included in the FDA submission, trials that had not been launched, trials mistakenly classified as involving the drug in ClinicalTrials.gov and trials whose starting date was too early as compared to regulatory submission. Third, we provide unique insights into the clinical research programs examining non-approved drug uses. Many studies have investigated off-label prescriptions, [18,19] but we used a slightly different approach. In effect, most drug labels are stringently phrased so as to be rigorously

1  
2  
3 aligned to pivotal trial criteria. [20] Therefore, categorizing trials according to the actual off-  
4  
5 or on-label status of the drug investigated would have led to classifying most as involving off-  
6  
7 label drug use. Put another way, the label was judged too narrow, and our method offers a  
8  
9 more significant picture for clinicians and epidemiologists. We believe that our classification  
10  
11 better reflects substantial evolution regarding the initially authorized use of novel drugs.  
12  
13

14  
15 Our findings raise several issues worthy of consideration about post-marketing  
16  
17 research. First, we showed that post-marketing research is both a heterogeneous and  
18  
19 concentrated landscape, probably linked to its loose regulation [4] and to market forces.  
20  
21 Therefore, most initiatives are at the discretion of funders, either industry or academic  
22  
23 institutions, and driven by various factors not necessarily linked to medical need or relevancy.  
24  
25 The number of post-marketing trials per novel drug and planned enrollment were highly  
26  
27 variable, but most trials were conducted in only one country and North America and Europe  
28  
29 were by far the most frequent locations. Median planned enrollment was low and many trials  
30  
31 were still not completed at the time of data acquisition. These findings question the absence of  
32  
33 steering or the lack of effectiveness or incentive policies for post-marketing research. Second,  
34  
35 almost 40% of post-marketing trials were designed for an indication other than the originally  
36  
37 approved indication, with non-industry trials more likely concerned. Although industry has  
38  
39 been blamed for testing their products in a too-liberal manner, [21] our findings suggest that  
40  
41 academics and other non-industry bodies might be more prone to assess authorized drugs in  
42  
43 innovative ways to evaluate novel indications. Third, we found that post-marketing trials  
44  
45 designed for the originally approved indication planned to enroll a greater number of patients  
46  
47 on average than those targeting novel indications. This latter finding is somewhat reassuring  
48  
49 because post-marketing trials for an already approved indication aim to refine knowledge  
50  
51 regarding the long-term effect and/or safety and should therefore include more patients than  
52  
53 preapproval trials.  
54  
55  
56  
57  
58  
59  
60

1  
2  
3 Our study has limitations. The first may be a registration bias at ClinicalTrials.gov,  
4 which would alter the exhaustiveness of our assessment. Some trials are not registered by  
5 researchers [22,23] and were therefore not included in our study. Others are imperfectly  
6 registered, with some information missing. However, ClinicalTrials.gov is widely recognized  
7 as a benchmark registry, and recent reports showed that compliance might have improved  
8 over time. [24] Another limitation is the definition of post-marketing trials, in that clinical  
9 trials are designed and launched according to a continuous timing and a single threshold  
10 might be lacking for distinguishing pre- and post-marketing trials. Therefore, we decided to  
11 consider trials starting at most 1 year before the first regulatory submission as post-marketing  
12 trials even though we could have made another choice. A third limitation is related to data  
13 sources. For some data, we relied on only one of the two selected regulators. We used such an  
14 approach for the sake of convenience and recognize that this could be interpreted as a bias, yet  
15 to our knowledge, there are very few if any differences in data between the two studied  
16 regulators. Therefore, this latter limitation in the methods seems unlikely to affect our  
17 findings.

18  
19 In conclusion, our research shows that post-marketing research is highly variable and  
20 concentrated, with on one hand, great differences in the number of post-marketing trials per  
21 drug and in planned enrollment and on the other, most trials being conducted in only one  
22 country, with North America and Europe the most represented locations. Approximately 40%  
23 of post-marketing trials assessed the drug for an indication other than the originally approved  
24 indication, more frequently non-industry trials. Even though some of our findings can be seen  
25 as reassuring, others underline the lack of global coordination of post-marketing research for  
26 novel drugs despite the undisputed influence of such research.

1  
2  
3 **Contributors:** Dr. Zeitoun and Pr. Ravaud were responsible for the conception and design of  
4  
5 this work. Dr. Zeitoun drafted the manuscript and was responsible for most of the data  
6  
7 acquisition. M. Ignacio Atal was responsible for data exportation and structuration. Dr.  
8  
9 Nicholas Downing was responsible for some of the data acquisition. Dr. Gabriel Baron  
10  
11 conducted the statistical analysis. Drs. Ross and Ravaud provided supervision. All authors  
12  
13 participated in the analysis and interpretation of the data and critically revised the manuscript  
14  
15 for important intellectual content.  
16  
17

18  
19 **Data sharing statement:** Data files are available from the corresponding author on  
20  
21 reasonable request.  
22  
23

24 **Acknowledgements:** The authors are grateful to EMA officials who graciously helped them  
25  
26 classify drug manufacturers. They also thank Geoffroy Beraud-Chaulet for his useful work on  
27  
28 Drugs@FDA and Elise Diard for her invaluable help on figures.  
29  
30

### 31 32 **References**

- 33  
34  
35 1 United States Government Accountability Office. Drug Safety: FDA Expedites Many  
36 Applications, But Data for Postapproval Oversight Need Improvement. 2015.  
37 <http://www.gao.gov/products/GAO-16-192> (accessed 15 Nov 2016).  
38  
39 2 Fain K, Daubresse M, Alexander G. The food and drug administration amendments act  
40 and postmarketing commitments. *JAMA* 2013;**310**:202–4. doi:10.1001/jama.2013.7900  
41  
42 3 Hoekman J, Klamer TT, Mantel-Teeuwisse AK, *et al.* Characteristics and follow-up of  
43 postmarketing studies of conditionally authorized medicines in the EU. *Br J Clin*  
44 *Pharmacol* 2016;**82**:213–26. doi:10.1111/bcp.12940  
45  
46 4 London AJ, Kimmelman J, Carlisle B. Research ethics. Rethinking research ethics: the  
47 case of postmarketing trials. *Science* 2012;**336**:544–5. doi:10.1126/science.1216086  
48  
49 5 Rathi VK, Krumholz HM, Masoudi FA, *et al.* Characteristics of clinical studies conducted  
50 over the total product life cycle of high-risk therapeutic medical devices receiving fda  
51 premarket approval in 2010 and 2011. *JAMA* 2015;**314**:604–12.  
52 doi:10.1001/jama.2015.8761  
53  
54 6 Reynolds RF, Lem JA, Gatto NM, *et al.* Is the large simple trial design used for  
55 comparative, post-approval safety research? A review of a clinical trials registry and the  
56  
57  
58  
59  
60

- 1  
2  
3 published literature. *Drug Saf* 2011;**34**:799–820. doi:10.2165/11593820-000000000-00000
- 4  
5  
6 7 Tang E, Ravaud P, Riveros C, *et al*. Comparison of serious adverse events posted at  
7 ClinicalTrials.gov and published in corresponding journal articles. *BMC Med*  
8 2015;**13**:189. doi:10.1186/s12916-015-0430-4
- 9  
10 8 Bachert C, Maurer M. Safety and efficacy of desloratadine in subjects with seasonal  
11 allergic rhinitis or chronic urticaria: results of four postmarketing surveillance studies.  
12 *Clin Drug Investig* 2010;**30**:109–22. doi:10.2165/11530930-000000000-00000
- 13  
14 9 Yeh RW, Kennedy K, Spertus JA, *et al*. Do postmarketing surveillance studies represent  
15 real-world populations? A comparison of patient characteristics and outcomes after  
16 carotid artery stenting. *Circulation* 2011;**123**:1384–90.  
17 doi:10.1161/CIRCULATIONAHA.110.991075
- 18  
19 10 Inrig JK, Califf RM, Tasneem A, *et al*. The landscape of clinical trials in nephrology: a  
20 systematic review of Clinicaltrials.gov. *Am J Kidney Dis Off J Natl Kidney Found*  
21 2014;**63**:771–80. doi:10.1053/j.ajkd.2013.10.043
- 22  
23 11 Endrikat J, Vogtlaender K, Dohanish S, *et al*. Safety of Gadobutrol: Results From 42  
24 Clinical Phase II to IV Studies and Postmarketing Surveillance After 29 Million  
25 Applications. *Invest Radiol* 2016;**51**:537–43. doi:10.1097/RLI.0000000000000270
- 26  
27 12 Drugs@FDA: FDA Approved Drug Products.  
28 <http://www.accessdata.fda.gov/scripts/cder/drugsatfda/index.cfm> (accessed 15 Nov 2016).
- 29  
30 13 European Medicines Agency - Find medicine - European public assessment reports.  
31 [http://www.ema.europa.eu/ema/index.jsp?curl=pages/medicines/landing/epar\\_search.jsp&](http://www.ema.europa.eu/ema/index.jsp?curl=pages/medicines/landing/epar_search.jsp&mid=WC0b01ac058001d124)  
32 [mid=WC0b01ac058001d124](http://www.ema.europa.eu/ema/index.jsp?curl=pages/medicines/landing/epar_search.jsp&mid=WC0b01ac058001d124) (accessed 15 Nov 2016).
- 33  
34 14 World Health Organization (WHO) Collaborating Center for Drug Statistics  
35 Methodology. ATC classification index with DDDs, 2014.  
36 2014.[http://www.whocc.no/atc\\_ddd\\_index/](http://www.whocc.no/atc_ddd_index/)
- 37  
38 15 Lanthier M, Miller KL, Nardinelli C, *et al*. An Improved Approach To Measuring Drug  
39 Innovation Finds Steady Rates Of First-In-Class Pharmaceuticals, 1987–2011. *Health Aff*  
40 (*Millwood*) 2013;**32**:1433–9. doi:10.1377/hlthaff.2012.0541
- 41  
42 16 Downing NS, Aminawung JA, Shah ND, *et al*. Clinical trial evidence supporting FDA  
43 approval of novel therapeutic agents, 2005-2012. *JAMA* 2014;**311**:368–77.  
44 doi:10.1001/jama.2013.282034
- 45  
46 17 Zeitoun J-D, Lefèvre JH, Downing NS, *et al*. Regulatory review time and post-market  
47 safety events for novel medicines approved by the EMA between 2001 and 2010: a cross-  
48 sectional study. *Br J Clin Pharmacol* 2015;**80**:716–26. doi:10.1111/bcp.12643
- 49  
50 18 Eguale T, Buckeridge DL, Verma A, *et al*. Association of Off-label Drug Use and  
51 Adverse Drug Events in an Adult Population. *JAMA Intern Med* 2016;**176**:55–63.  
52 doi:10.1001/jamainternmed.2015.6058
- 53  
54  
55  
56  
57  
58  
59  
60

- 1  
2  
3 19 Danés I, Agustí A, Vallano A, *et al.* Outcomes of off-label drug uses in hospitals: a  
4 multicentric prospective study. *Eur J Clin Pharmacol* 2014;**70**:1385–93.  
5 doi:10.1007/s00228-014-1746-2  
6
- 7 20 Eichler H-G, Abadie E, Breckenridge A, *et al.* Bridging the efficacy-effectiveness gap: a  
8 regulator’s perspective on addressing variability of drug response. *Nat Rev Drug Discov*  
9 2011;**10**:495–506. doi:10.1038/nrd3501  
10
- 11 21 Smith R, Gøtzsche PC, Groves T. Should journals stop publishing research funded by the  
12 drug industry? *BMJ* 2014;**348**:g171.  
13
- 14 22 Boccia S, Rothman KJ, Panic N, *et al.* Registration practices for observational studies on  
15 ClinicalTrials.gov indicated low adherence. *J Clin Epidemiol* 2016;**70**:176–82.  
16 doi:10.1016/j.jclinepi.2015.09.009  
17
- 18 23 Dal-Ré R, Ross JS, Marušić A. Compliance with prospective trial registration guidance  
19 remained low in high-impact journals and has implications for primary end point  
20 reporting. *J Clin Epidemiol* 2016;**75**:100–7. doi:10.1016/j.jclinepi.2016.01.017  
21
- 22 24 Viergever RF, Li K. Trends in global clinical trial registration: an analysis of numbers of  
23 registered clinical trials in different parts of the world from 2004 to 2013. *BMJ Open*  
24 2015;**5**:e008932. doi:10.1136/bmjopen-2015-008932  
25
- 26 25 Lozano R, Naghavi M, Foreman K, *et al.* Global and regional mortality from 235 causes  
27 of death for 20 age groups in 1990 and 2010: a systematic analysis for the Global Burden  
28 of Disease Study 2010. *The Lancet* 2012;**380**:2095–128. doi:10.1016/S0140-  
29 6736(12)61728-0  
30  
31  
32  
33  
34  
35  
36  
37  
38  
39  
40  
41  
42  
43  
44  
45  
46  
47  
48  
49  
50  
51  
52  
53  
54  
55  
56  
57  
58  
59  
60

## Legends

Figure 1: Number of post-marketing trials and respective proportion of industry and non-industry funders.

Figure 2: Number of non-approved indications targeted in post-marketing trials for each drug of our study sample. Indications are rank-ordered on the basis of the number of post-marketing trials launched (from the greatest number of post-marketing trials on the left side of the figure to the lowest number on the right side). Color of boxes varies according to the advanced phase of the targeted indication. Indications are classified according to the Global Burden of Diseases classification. [25] Indications belonging to residual categories or health conditions not relevant to the Global Burden of Diseases were excluded and therefore are not represented in the Figure.

Figure 3: Annual number of post-marketing trials over the life-cycle of drugs, stratified by indication.

Supplemental File S1: Flow chart leading to the final study sample of 6679 relevant post-marketing trials.

Supplemental File S2: Total number of patients to be included in post-marketing trials for each drug.

Supplemental File S3: Population in preapproval trials and post-marketing trials.

Supplemental File S4: Number of post-marketing trials and respective proportion of industry and non-industry funders, with a 4-year follow-up for each drug.

1  
2  
3 Supplemental File S5: Annual number of post-marketing trials over the life-cycle of drugs,  
4  
5 stratified by sponsor.  
6  
7

8 Supplemental File S6: Locations of post-marketing trials.  
9  
10  
11  
12  
13  
14  
15  
16  
17  
18  
19  
20  
21  
22  
23  
24  
25  
26  
27  
28  
29  
30  
31  
32  
33  
34  
35  
36  
37  
38  
39  
40  
41  
42  
43  
44  
45  
46  
47  
48  
49  
50  
51  
52  
53  
54  
55  
56  
57  
58  
59  
60

For peer review only



Table 1. Characteristics of 69 novel drugs approved by both the FDA and EMA between 2005 and 2010 (excluding everolimus and temsirolimus).

| Characteristics                                               | n (%)      |
|---------------------------------------------------------------|------------|
| <b>Agent type</b>                                             |            |
| Small molecule                                                | 51 (73.9%) |
| Biologic                                                      | 18 (26.1%) |
| Orphan status (FDA)                                           | 18 (26.1%) |
| Orphan designation (EMA)                                      | 20 (29.0%) |
| <b>Therapeutic class according to the ATC code</b>            |            |
| Alimentary tract and metabolism                               | 10 (14.5%) |
| Anti-infectives for systemic use                              | 12 (17.4%) |
| Antineoplastic and immunomodulating agents                    | 20 (29.0%) |
| Blood and blood forming organs                                | 5 (7.2%)   |
| Cardiovascular system                                         | 5 (7.2%)   |
| Nervous system                                                | 6 (8.7%)   |
| Other*                                                        | 11 (15.9%) |
| <b>Degree of novelty (according to Lanthier <i>et al</i>)</b> |            |
| First-in-class                                                | 24 (34.8%) |
| Advance-in-class                                              | 24 (34.8%) |
| Addition-to-class                                             | 21 (30.4%) |
| <b>Size of the marketing-authorization holder</b>             |            |
| Large pharmaceutical company                                  | 44 (63.8%) |
| Intermediated-size company                                    | 23 (33.3%) |
| Small- and medium-size company                                | 2 (2.9%)   |
| <b>Premarket evidence</b>                                     |            |
| At least one pivotal trial using an active comparator         | 28 (40.6%) |

|                                     |                |
|-------------------------------------|----------------|
| Placebo only                        | 34 (49.3%)     |
| No comparator                       | 7 (10.1%)      |
| Total no. of included patients      |                |
| Min/max                             | 18/18040       |
| Median [Q1-Q3]                      | 923 [324-1996] |
| Mean (SD)                           | 1806 (2897)    |
| <b>Expected length of treatment</b> |                |
| Acute                               | 8 (11.6%)      |
| Intermediate                        | 14 (20.3%)     |
| Chronic                             | 47 (68.1%)     |

ATC, Anatomical Therapeutic Chemical

\*includes dermatological, genitourinary system and sex hormones, musculoskeletal system, sensory organs, systemic hormonal preparations, excluding sex hormones, and others

Table 2. Characteristics of industry and non-industry post-marketing trials registered at ClinicalTrials.gov before September 24, 2014 for the 69 novel drugs in the study sample.

| Characteristics                                                        |                |                    | Industry trials | Non-industry trials |
|------------------------------------------------------------------------|----------------|--------------------|-----------------|---------------------|
| <b>Primary sponsor</b>                                                 | Industry       | 2713 (40.6%)       |                 |                     |
|                                                                        | NIH            | 286 (4.3%)         |                 |                     |
|                                                                        | US Fed         | 15 (0.2%)          |                 |                     |
|                                                                        | Other          | 3665 (54.9%)       |                 |                     |
| <b>Industry involved either as a primary sponsor or a collaborator</b> |                | 4176 (62.5%)       |                 |                     |
| <b>No. of post-marketing trials per drug</b>                           | Min/max        | 3/530              |                 |                     |
|                                                                        | Median [Q1-Q3] | 55 [30-119]        |                 |                     |
|                                                                        | Mean (SD)      | 96.8 (110.3)       |                 |                     |
| <b>Population size per drug</b>                                        | Min/max        | 67/1.05E6          |                 |                     |
|                                                                        | Median [Q1-Q3] | 15418 [4932-37523] |                 |                     |
|                                                                        | Mean (SD)      | 62748 (166644)     |                 |                     |

|                                                    |                                                                |              |              |              |
|----------------------------------------------------|----------------------------------------------------------------|--------------|--------------|--------------|
| <b>Therapeutic class according to the ATC code</b> |                                                                |              |              |              |
| Alimentary tract and metabolism                    |                                                                | 832 (12.5%)  | 570 (68.5%)  | 262 (31.5%)  |
| Anti-infectives for systemic use                   |                                                                | 828 (12.4%)  | 504 (60.9%)  | 324 (39.1%)  |
| Antineoplastic and immunomodulating agents         |                                                                | 3040 (45.5%) | 1818 (59.8%) | 1222 (40.2%) |
| Blood and blood forming organs                     |                                                                | 446 (6.7%)   | 277 (62.1%)  | 169 (37.9%)  |
| Nervous system                                     |                                                                | 485 (7.3%)   | 304 (62.7%)  | 181 (37.3%)  |
| Other*                                             |                                                                | 1048 (15.7%) | 703 (67.1%)  | 345 (32.9%)  |
| <b>Trial design with respect to primary label</b>  | Another indication than the originally approved indication     | 2561 (38.3%) | 1397 (54.5%) | 1164 (45.5%) |
|                                                    | Originally approved indication                                 | 3889 (58.2%) | 2666 (68.6%) | 1223 (31.4%) |
|                                                    | Both the originally approved indication and another indication | 229 (3.4%)   | 113 (49.3%)  | 116 (50.7%)  |
| <b>Study type</b>                                  | Observational                                                  | 707 (10.6%)  | 468 (66.2%)  | 239 (33.8%)  |
|                                                    | Interventional                                                 | 5972 (89.4%) | 3708 (62.1%) | 2264 (37.9%) |

1  
2  
3  
4  
5  
6  
7  
8  
9  
10  
11  
12  
13  
14  
15  
16  
17  
18  
19  
20  
21  
22  
23  
24  
25  
26  
27  
28  
29  
30  
31  
32  
33  
34  
35  
36  
37  
38  
39  
40  
41  
42  
43  
44  
45  
46  
47  
48  
49

|                      |                |              |              |              |
|----------------------|----------------|--------------|--------------|--------------|
| <b>Randomization</b> | Missing data   | 2452         |              |              |
|                      | Yes            | 3067 (72.6%) | 1979 (64.5%) | 1088 (35.5%) |
|                      | No             | 1160 (27.4%) | 769 (66.3%)  | 391 (33.7%)  |
| <b>Study phase</b>   | 0              | 34 (0.6%)    | 13 (38.2%)   | 21 (61.8%)   |
|                      | I              | 933 (16.6%)  | 651 (69.8%)  | 282 (30.2%)  |
|                      | I/II           | 423 (7.5%)   | 245 (58.0%)  | 178 (42.0%)  |
|                      | II             | 1837 (32.6%) | 1047 (57.0%) | 790 (43.0%)  |
|                      | II/III         | 109 (1.9%)   | 52 (47.7%)   | 57 (52.3%)   |
|                      | III            | 1246 (22.1%) | 1018 (81.7%) | 228 (18.3%)  |
|                      | IV             | 1045 (18.6%) | 596 (57.0%)  | 449 (43.0%)  |
| <b>Centers</b>       | Missing data   | 503          | 428          | 75           |
|                      | Min/max        | 1/1616       | 1/1616       | 1/922        |
|                      | Median [Q1-Q3] | 2 [1-12]     | 4 [1-23]     | 1 [1-2]      |
|                      | Mean (SD)      | 19.9 (62.1)  | 26.4 (70.5)  | 9.8 (44.7)   |
| <b>Countries</b>     | Min/max        | 1/46         | 1/46         | 1/15         |
|                      | Median [Q1-Q3] | 1 [1-1]      | 1 [1-2]      | 1 [1-1]      |
|                      | Mean (SD)      | 2.6 (4.7)    | 3.6 (5.8)    | 1.1 (0.7)    |

|                                               |                         |               |               |                |
|-----------------------------------------------|-------------------------|---------------|---------------|----------------|
| <b>Planned enrollment</b>                     | Min/max                 | 1/904585      | 1/904585      | 1/61050        |
|                                               | Median [Q1-Q3]          | 60 [28-183]   | 72 [30-248]   | 48 [24-100]    |
|                                               | Mean (SD)               | 649.6 (12812) | 943.8 (16167) | 158.9 (1274.7) |
| <b>Status at the time of data exportation</b> | Not yet recruiting      | 319 (4.8%)    | 136 (42.6%)   | 183 (57.4%)    |
|                                               | Recruiting              | 1895 (28.4%)  | 886 (46.8%)   | 1009 (53.2%)   |
|                                               | Active, not recruiting  | 1013 (15.2%)  | 627 (61.9%)   | 386 (38.1%)    |
|                                               | Enrolling by invitation | 64 (1.0%)     | 42 (65.6%)    | 22 (34.4%)     |
|                                               | Completed               | 2901 (43.4%)  | 2147 (74.0%)  | 754 (26.0%)    |
|                                               | Terminated              | 487 (7.3%)    | 338 (69.4%)   | 149 (30.6%)    |

NIH, US National Institutes of Health

\*includes cardiovascular system, dermatological, genitourinary system and sex hormones, musculoskeletal system, sensory organs, systemic hormonal preparations, excluding sex hormones, and other

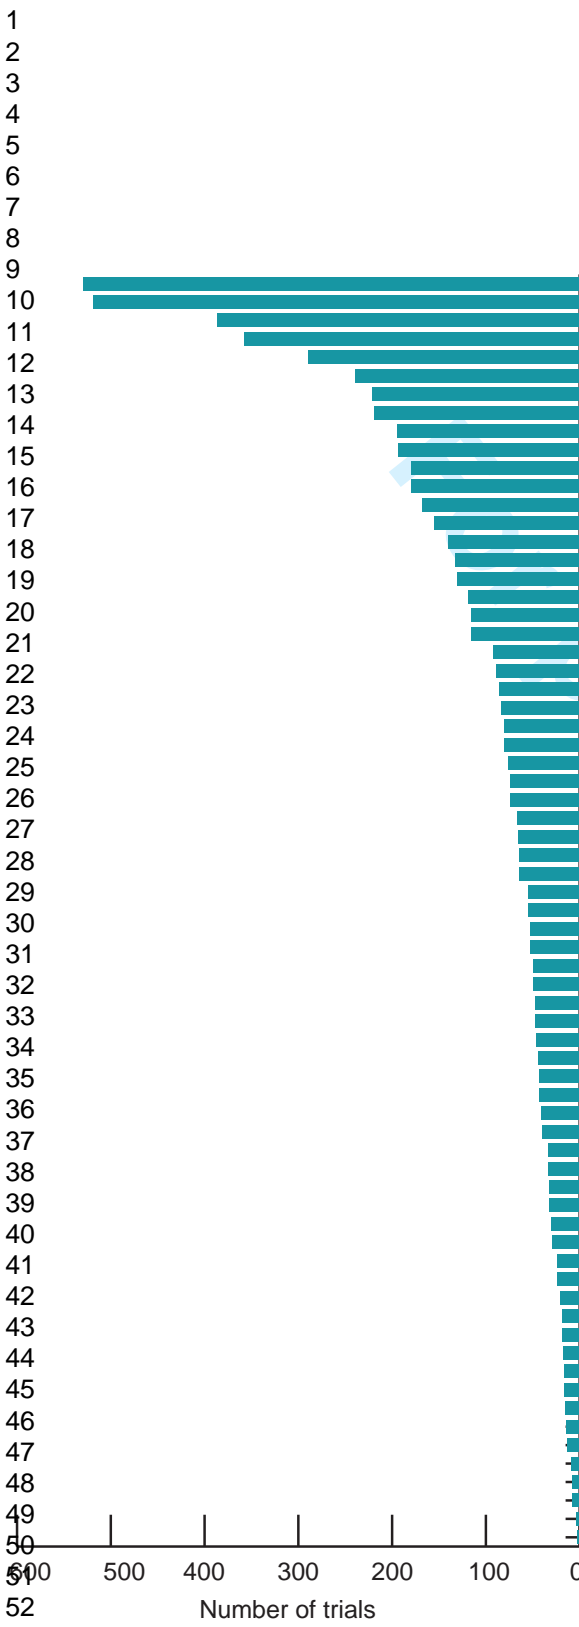

- Sorafenib
- Lenalidomide
- Ranibizumab
- Sunitinib
- Sitagliptin
- Raltegravir
- Lapatinib
- Varenicline
- Exenatide
- Dasatinib
- Tocilizumab
- Pazopanib
- Liraglutide
- Prasugrel
- Panitumumab
- Aliskiren
- Paliperidone
- Nilotinib
- Dabigatran
- Entecavir
- Abatacept
- Plerixafor
- Darunavir
- Maraviroc
- Saxagliptin
- Eltrombopag
- Ofatumumab
- Certolizumab pegol
- Methoxy polyethylene
- Ranolazine
- Deferasirox
- Denosumab
- Rotigotine
- Tolvaptan
- Degarelix
- Lacosamide
- Etravirine
- Ustekinumab
- Telbivudine
- Fesoterodine fumarate
- Eculizumab
- Golimumab
- Canakinumab
- Ambrisentan
- Sapropterin
- Micafungin
- Tigecycline
- Febuxostat
- Nepafenac
- Anidulafungin
- Posaconazole
- Tipranavir
- Collagenase clostridium
- Mecasermin
- Doripenem
- Romplostim
- Ulipristal
- Alglucidase
- Riloncept
- Silodosin
- Dronedarone
- Methylnaltrexone bromide
- Idursulfase
- Retapamulin
- Rufinamide
- Nelarabine
- Asenapine maleate
- Velaglycerase alfa
- Galsulfase

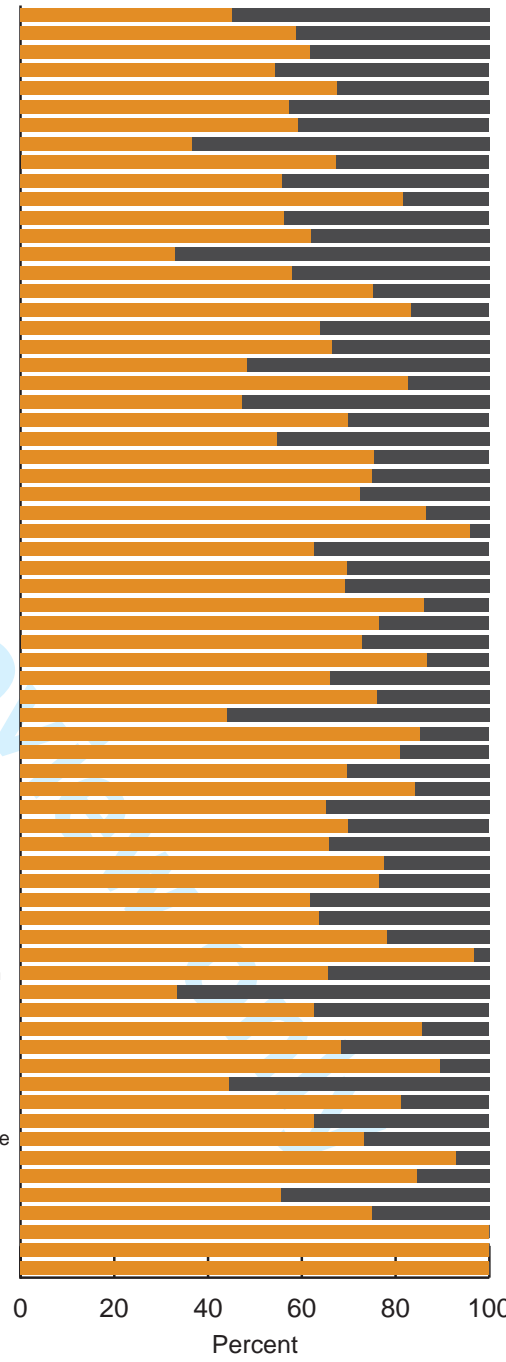

Industry trials  
Non-industry trials

51  
52  
53  
54  
55  
56  
57  
58  
59  
60

Phase :

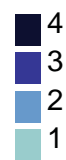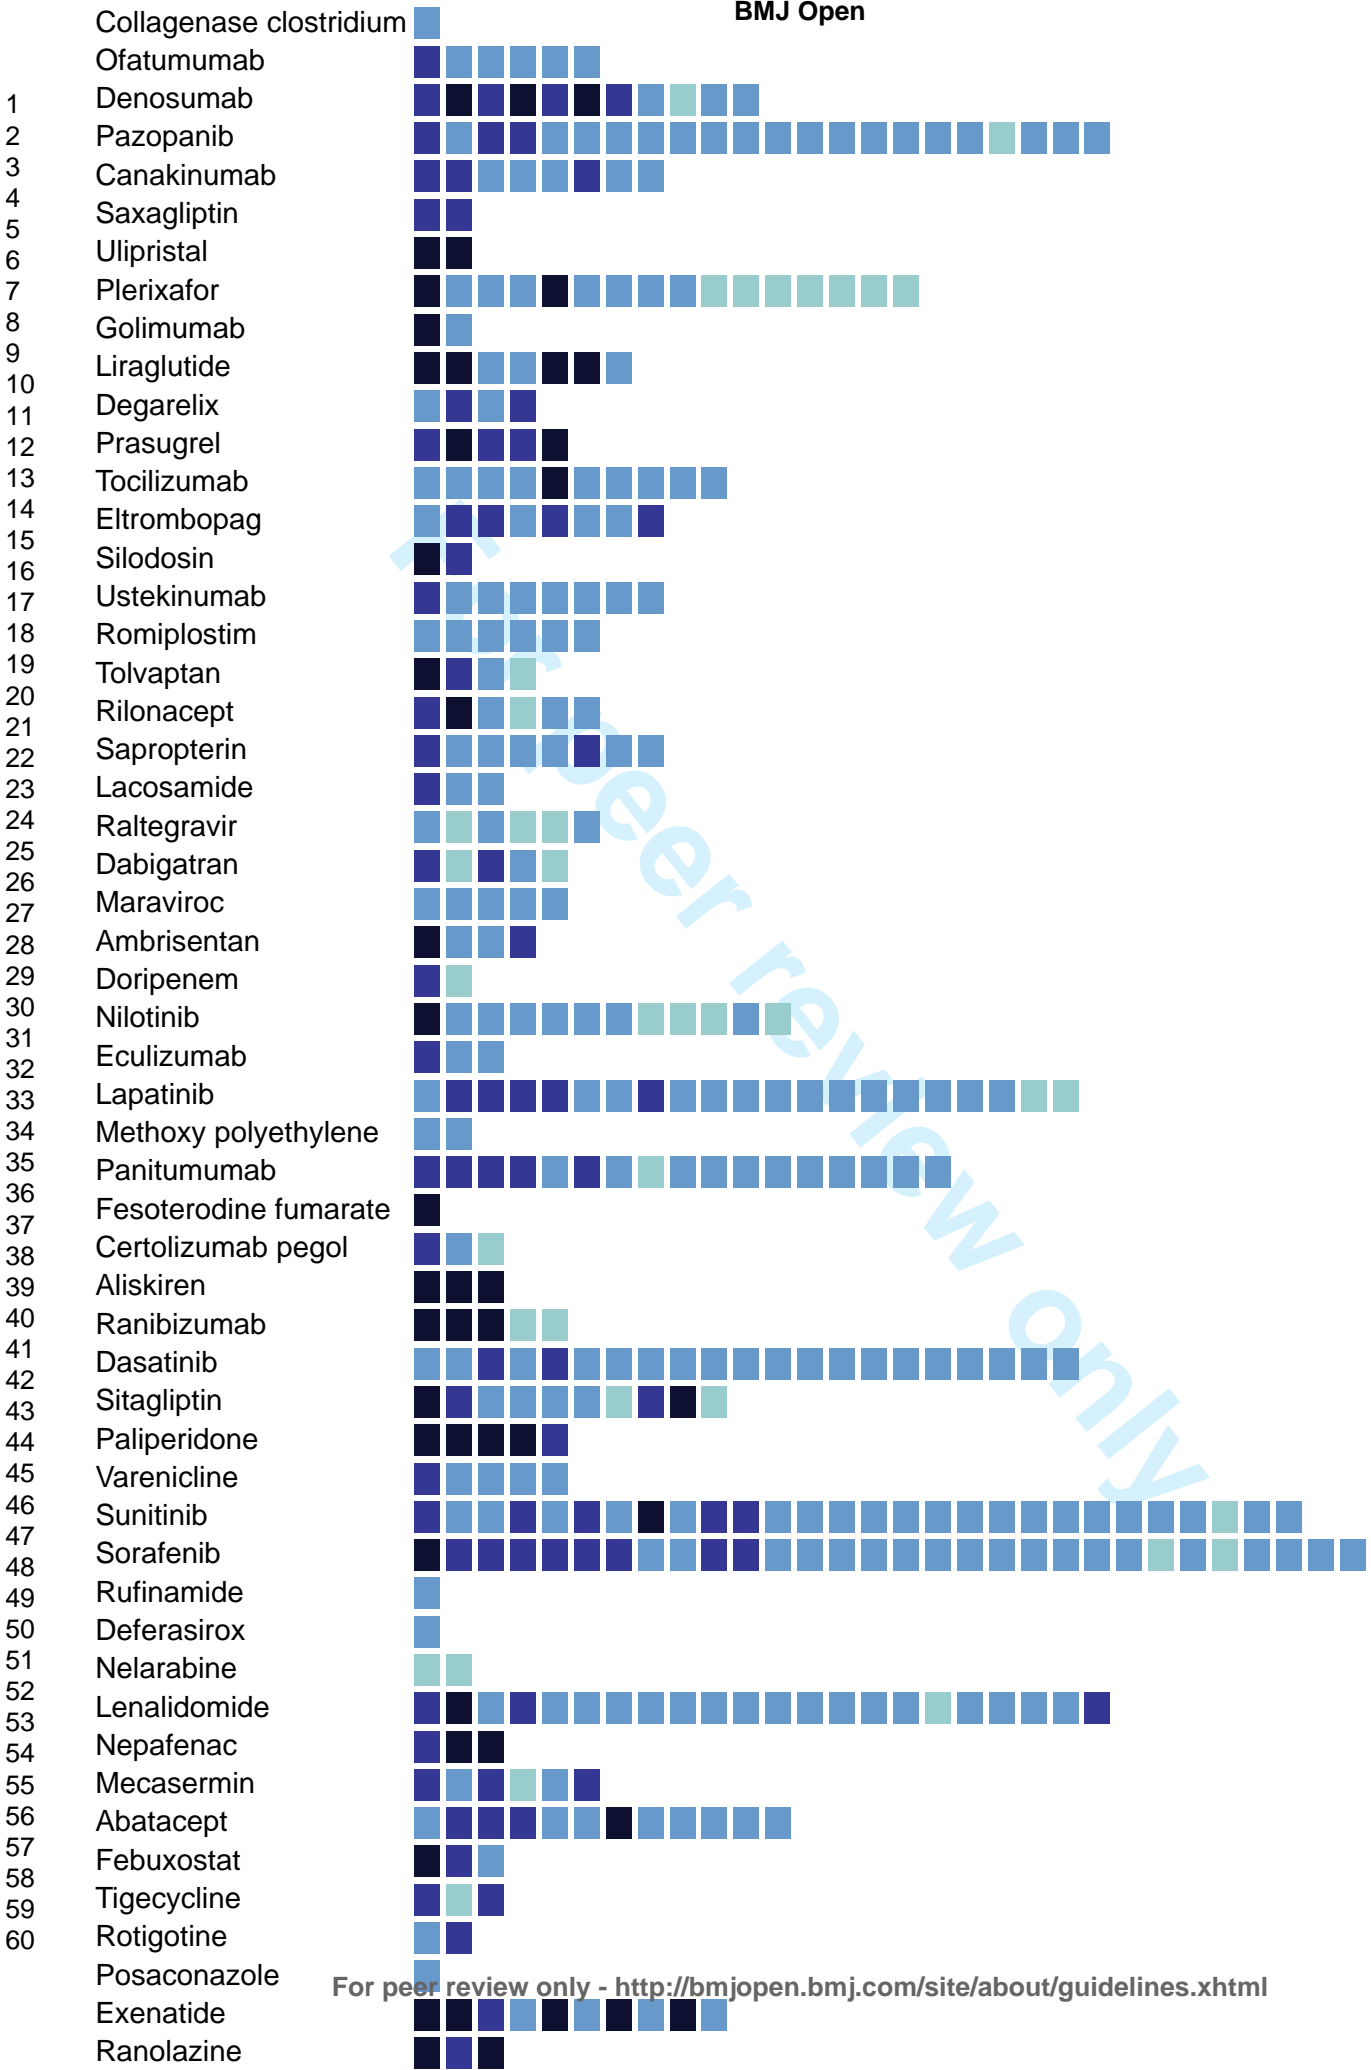



1  
2  
3  
4  
5  
6  
7  
8  
9  
10  
11  
12  
13  
14  
15  
16  
17  
18  
19  
20  
21  
22  
23  
24  
25  
26  
27  
28  
29  
30  
31  
32  
33  
34  
35  
36  
37  
38  
39  
40  
41  
42  
43  
44  
45  
46  
47  
48  
49  
50  
51  
52  
53  
54  
55  
56  
57  
58  
59  
60

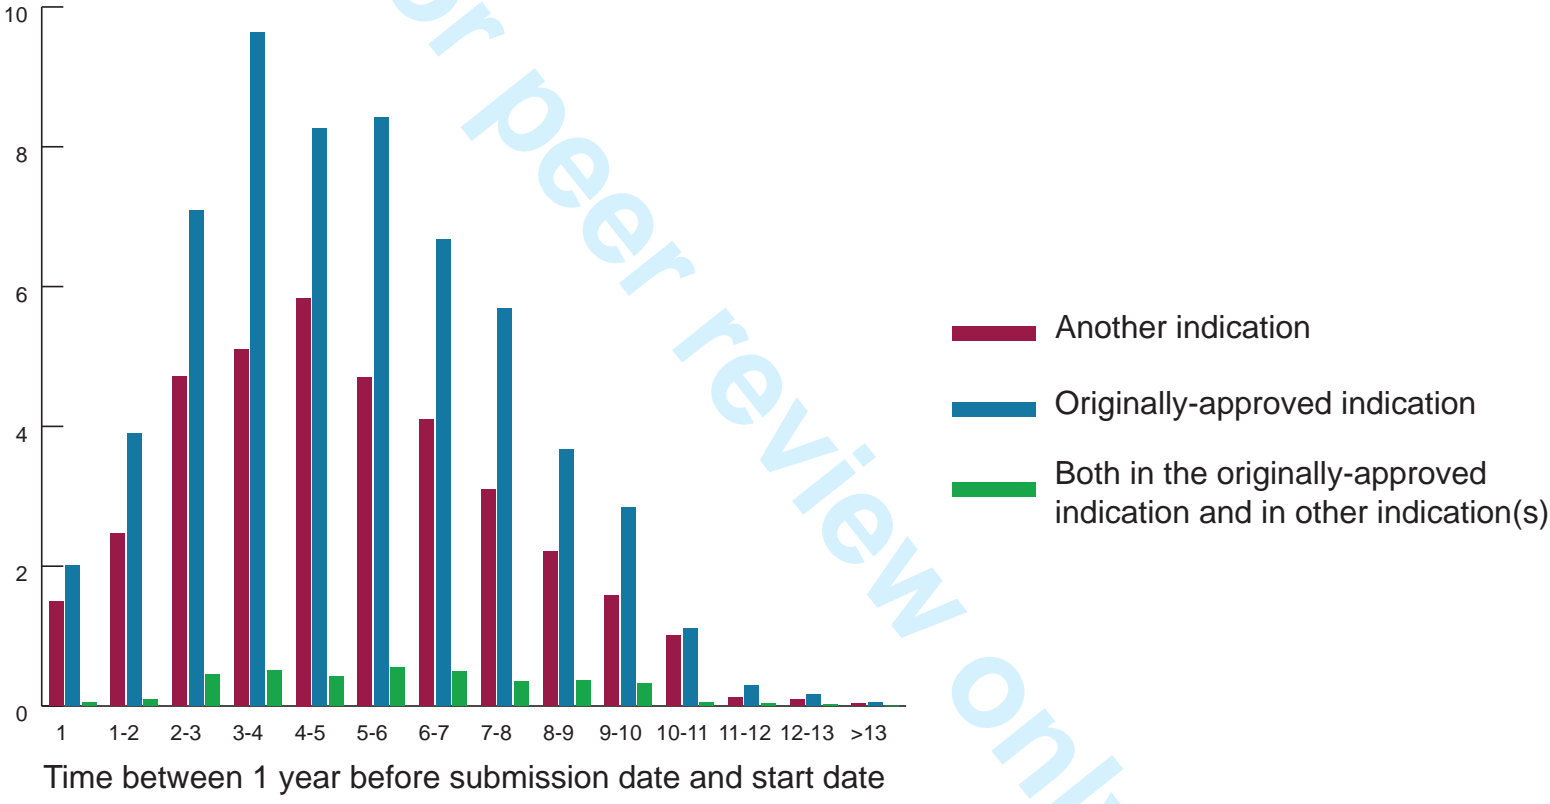

For peer review only

Figure 1. Sample construction of relevant post-marketing trials related to all 69 novel drugs both approved by the FDA and the EMA between 2005 and 2010, after exclusion of everolimus and temsirolimus

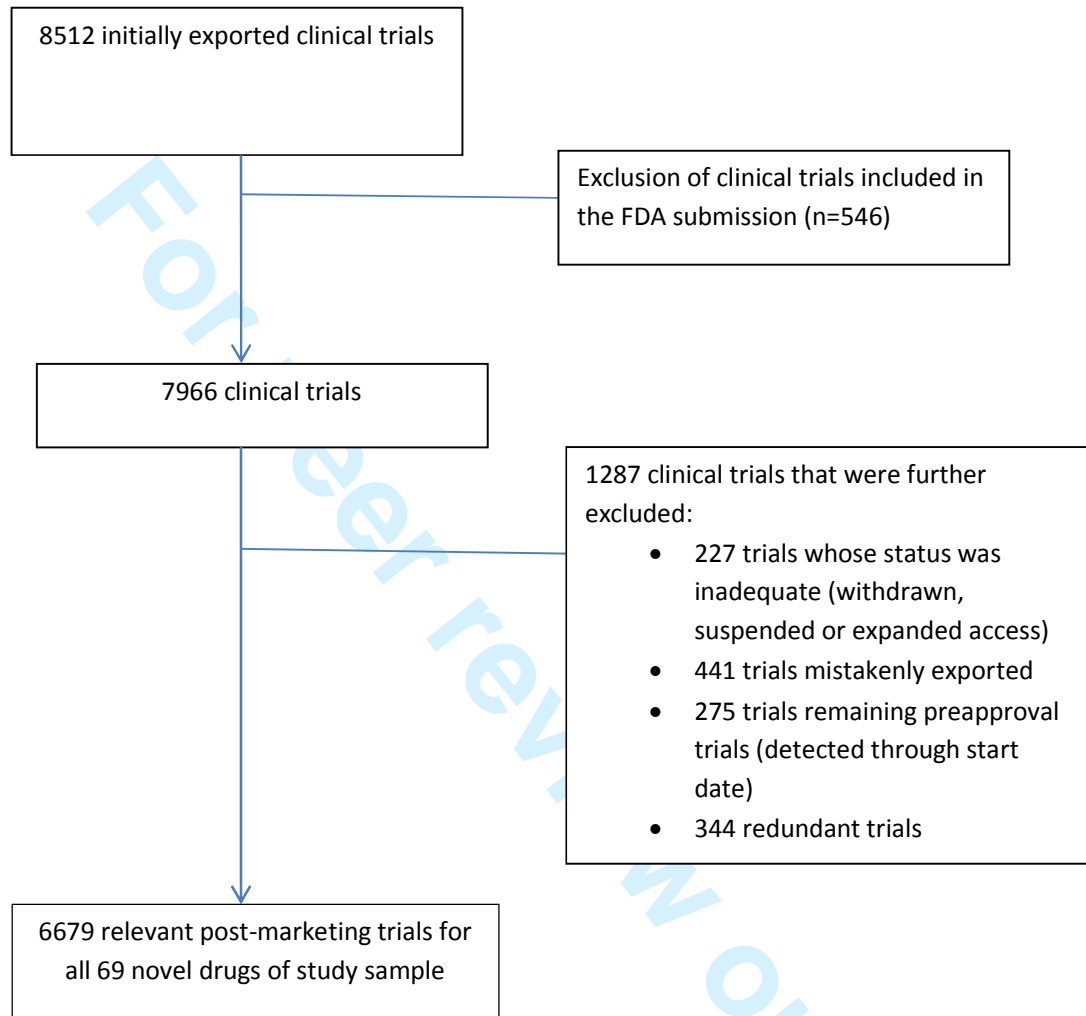

1  
2  
3  
4  
5  
6  
7  
8  
9  
10  
11  
12  
13  
14  
15  
16  
17  
18  
19  
20  
21  
22  
23  
24  
25  
26  
27  
28  
29  
30  
31  
32  
33  
34  
35  
36  
37  
38  
39  
40  
41  
42  
43  
44  
45  
46  
47  
48  
49  
50  
51  
52  
53  
54  
55  
56  
57  
58  
59  
60

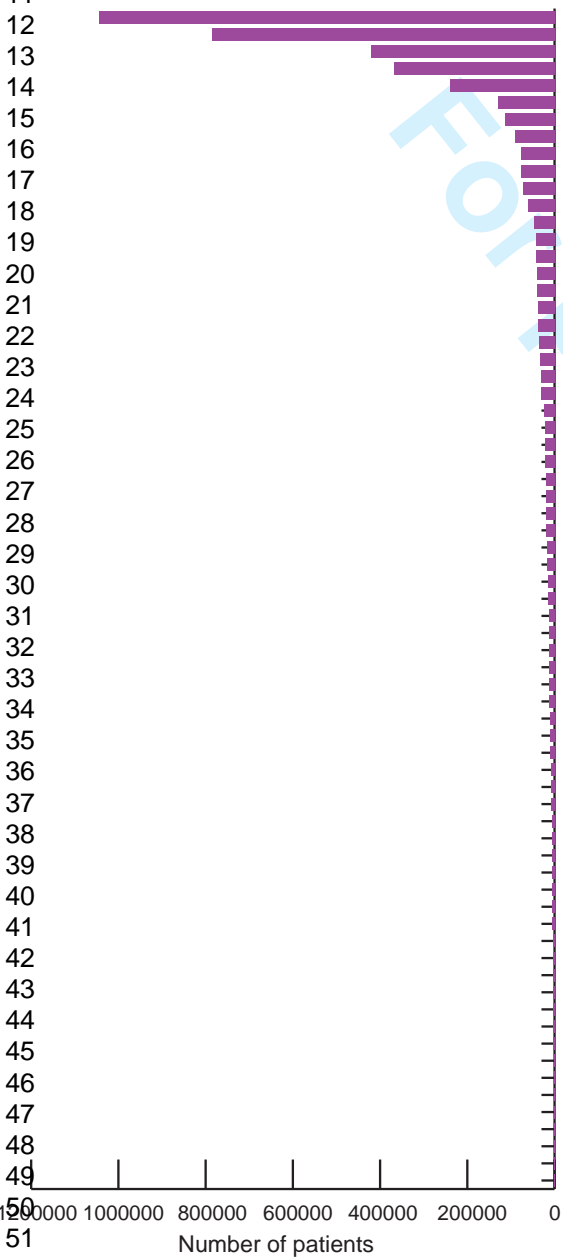

Varenicline  
Saxagliptin  
Exenatide  
Dabigatran  
Abatacept  
Prasugrel  
Sitagliptin  
Ranibizumab  
Aliskiren  
Sorafenib  
Liraglutide  
Lenalidomide  
Lapatinib  
Paliperidone  
Micafungin  
Entecavir  
Darunavir  
Certolizumab pegol  
Sunitinib  
Tocilizumab  
Denosumab  
Raltegravir  
Lacosamide  
Fesoterodine fumarate  
Panitumumab  
Methoxy polyethylene  
Ustekinumab  
Pazopanib  
Tigecycline  
Dasatinib  
Golimumab  
Silodosin  
Febuxostat  
Nilotinib  
Canakinumab  
Telbivudine  
Tolvaptan  
Plerixafor  
Ambrisentan  
Rotigotine  
Maraviroc  
Dronedarone  
Degarelix  
Ranolazine  
Deferasirox  
Ofatumumab  
Nepafenac  
Sapropterin  
Eculizumab  
Eltrombopag  
Mecasermin  
Ulipristal  
Etravirine  
Retapamulin  
Posaconazole  
Collagenase clostridium  
Anidulafungin  
Methylaltraxone bromide  
Doripenem  
Nelarabine  
Rilonacept  
Asenapine maleate  
Romiplostim  
Tipranavir  
Rufinamide  
Aglycidase  
Idursulfase  
Galsulfase  
Velaglucerase alfa

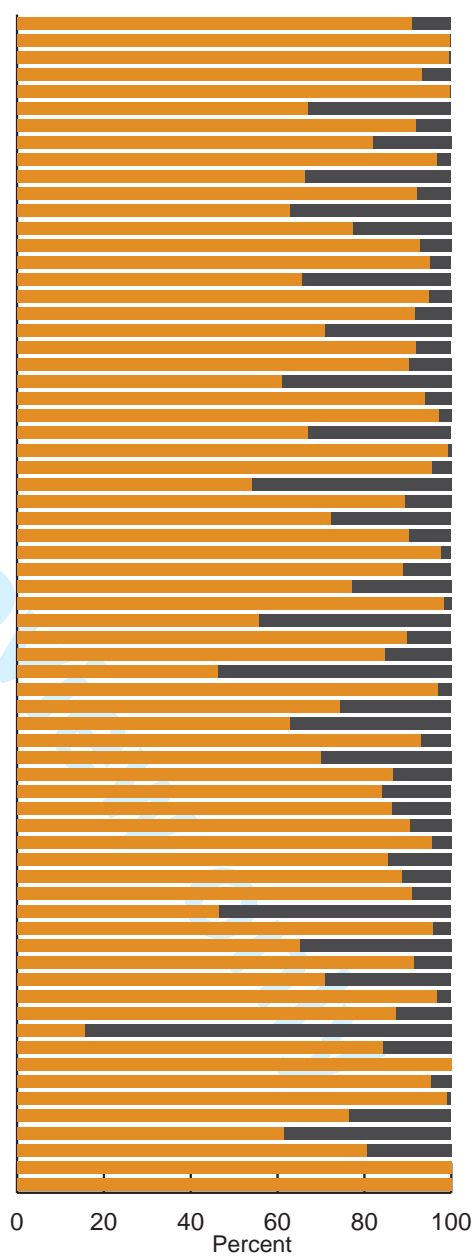

Industry trials  
Non-industry trials

1  
2  
3  
4  
5  
6  
7  
8  
9  
10  
11  
12  
13  
14  
15  
16  
17  
18  
19  
20  
21  
22  
23  
24  
25  
26  
27  
28  
29  
30  
31  
32  
33  
34  
35  
36  
37  
38  
39  
40  
41  
42  
43  
44  
45  
46  
47  
48  
49  
50  
51  
52  
53  
54  
55  
56  
57  
58  
59  
60

Population in preapproval trials

Population in post-marketing trials

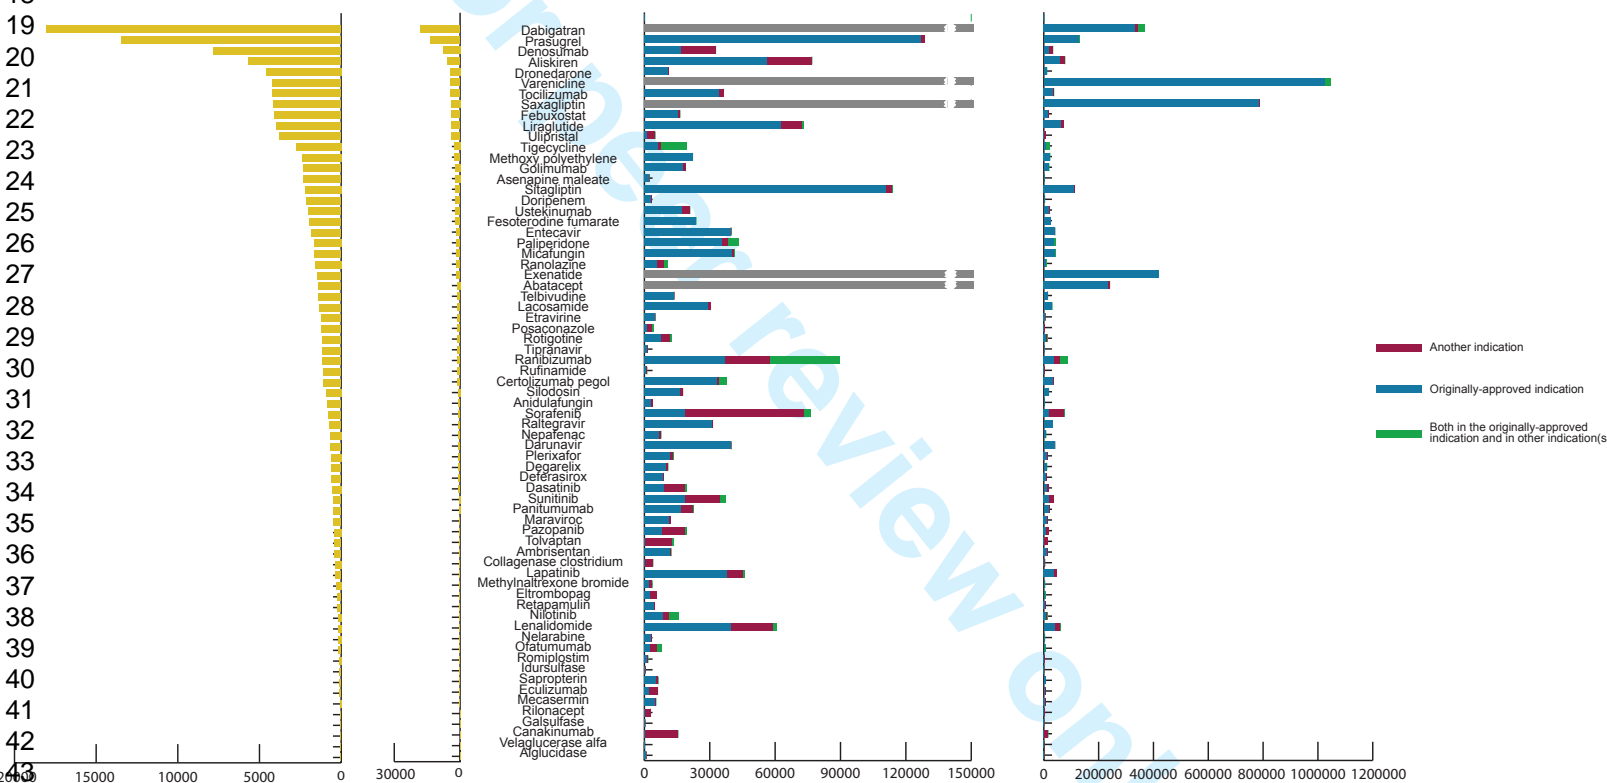

1  
2  
3  
4  
5  
6  
7  
8  
9  
10  
11  
12  
13  
14  
15  
16  
17  
18  
19  
20  
21  
22  
23  
24  
25  
26  
27  
28  
29  
30  
31  
32  
33  
34  
35  
36  
37  
38  
39  
40  
41  
42  
43  
44  
45  
46  
47  
48  
49  
50  
51  
52  
53  
54  
55  
56  
57  
58  
59  
60

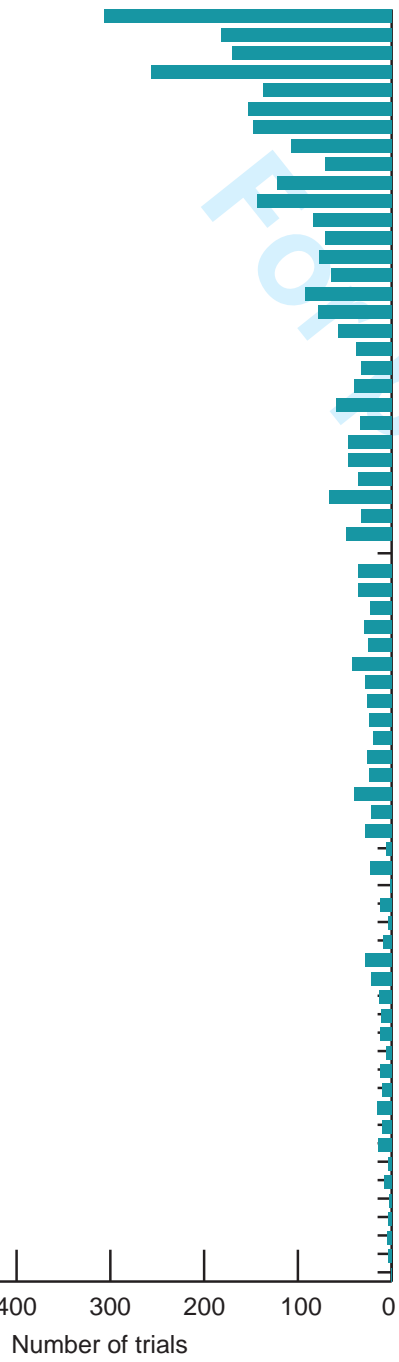

Sorafenib  
Lenalidomide  
Ranibizumab  
Sunitinib  
Sitagliptin  
Raltegravir  
Lapatinib  
Varenicline  
Exenatide  
Dasatinib  
Tocilizumab  
Pazopanib  
Liraglutide  
Prasugrel  
Panitumumab  
Aliskiren  
Paliperidone  
Nilotinib  
Dabigatran  
Entecavir  
Abatacept  
Plerixafor  
Darunavir  
Maraviroc  
Saxagliptin  
Eltrombopag  
Ofatumumab  
Certolizumab pegol  
Methoxy polyethylene  
Ranolazine  
Deferasirox  
Denosumab  
Rotigotine  
Tolvaptan  
Degarelix  
Lacosamide  
Etravirine  
Ustekinumab  
Telbivudine  
Fesoterodine fumarate  
Eculizumab  
Golimumab  
Canakinumab  
Ambrisentan  
Sapropterin  
Micafungin  
Tigecycline  
Febuxostat  
Nepafenac  
Anidulafungin  
Posaconazole  
Tipranavir  
Collagenase clostridium  
Mecasermin  
Doripenem  
Rompiplostim  
Ulipristal  
Alglucidase  
Rilonacept  
Silodosin  
Dronedarone  
Methylnaltrexone bromide  
Idursulfase  
Retapamulin  
Rufinamide  
Nelarabine  
Asenapine maleate  
Velaglycerase alfa  
Galsulfase

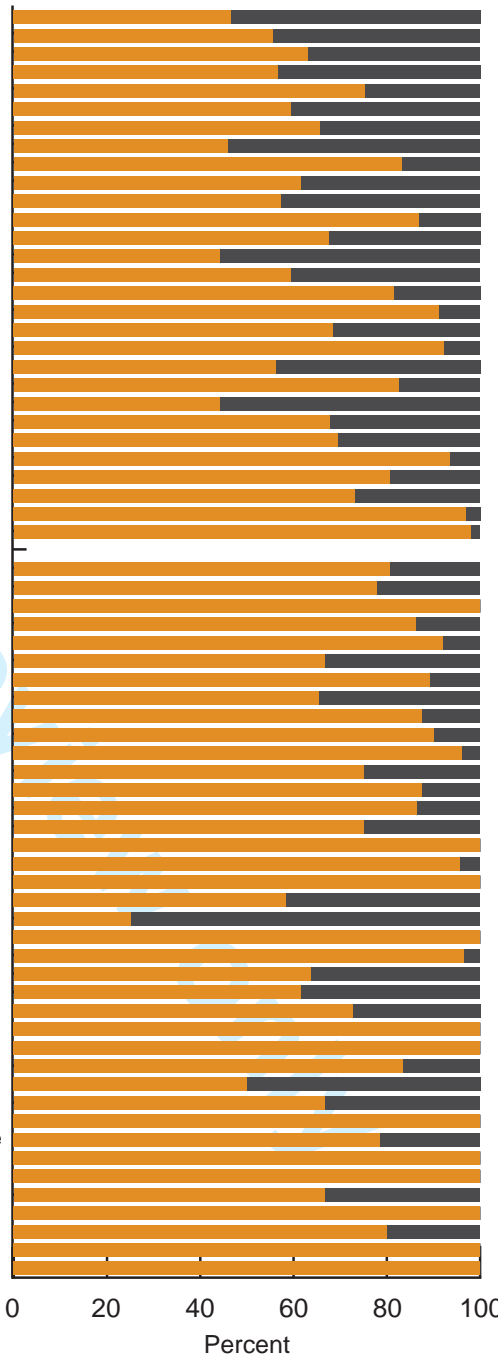

Industry trials  
Non-industry trials

1  
2  
3  
4  
5  
6  
7  
8  
9  
10  
11  
12  
13  
14  
15  
16  
17  
18  
19  
20  
21  
22  
23  
24  
25  
26  
27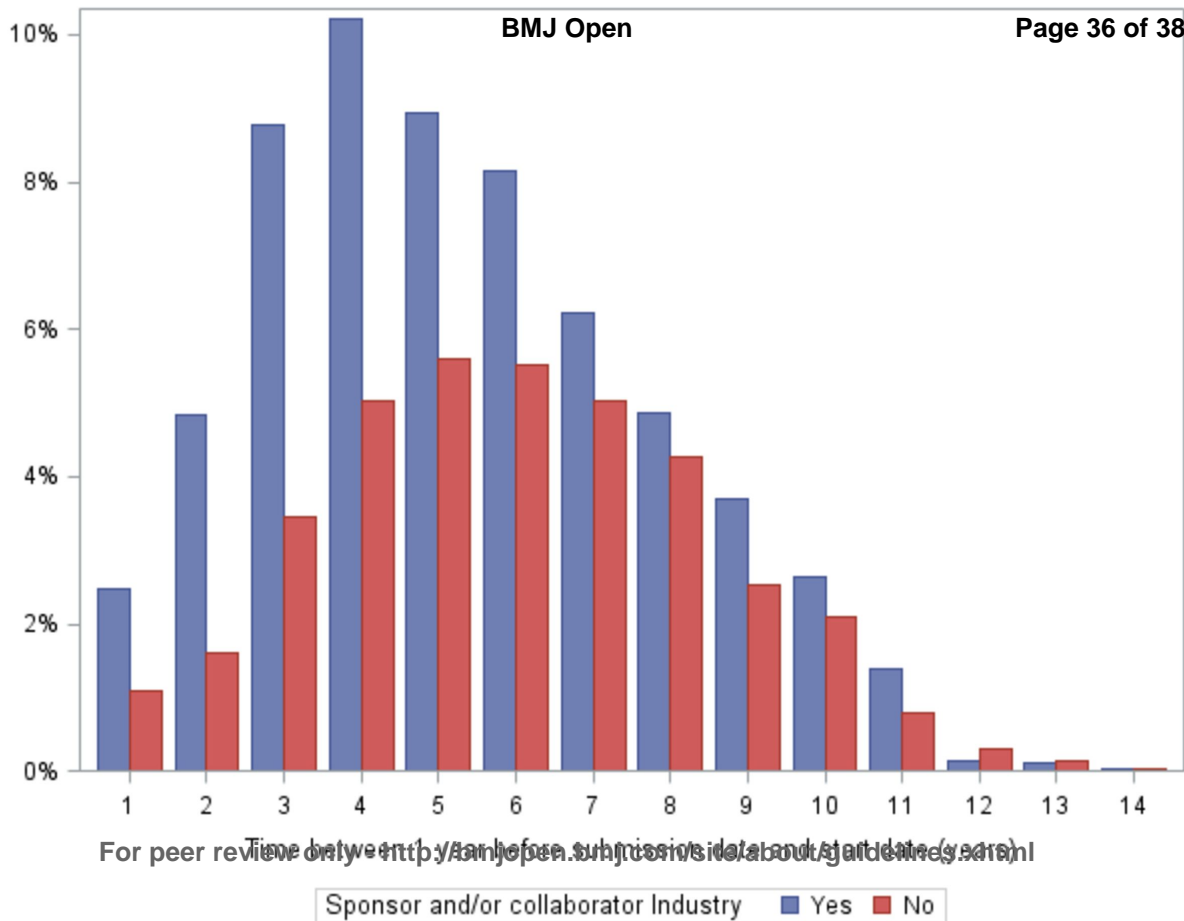

1  
2  
3  
4  
5  
6  
7  
8  
9  
10  
11  
12  
13  
14  
15  
16  
17  
18  
19  
20  
21  
22  
23  
24  
25  
26  
27  
28  
29  
30  
31  
32  
33  
34  
35  
36  
37  
38  
39  
40  
41  
42  
43  
44  
45  
46  
47  
48  
49  
50  
51  
52  
53  
54  
55  
56  
57  
58  
59  
60

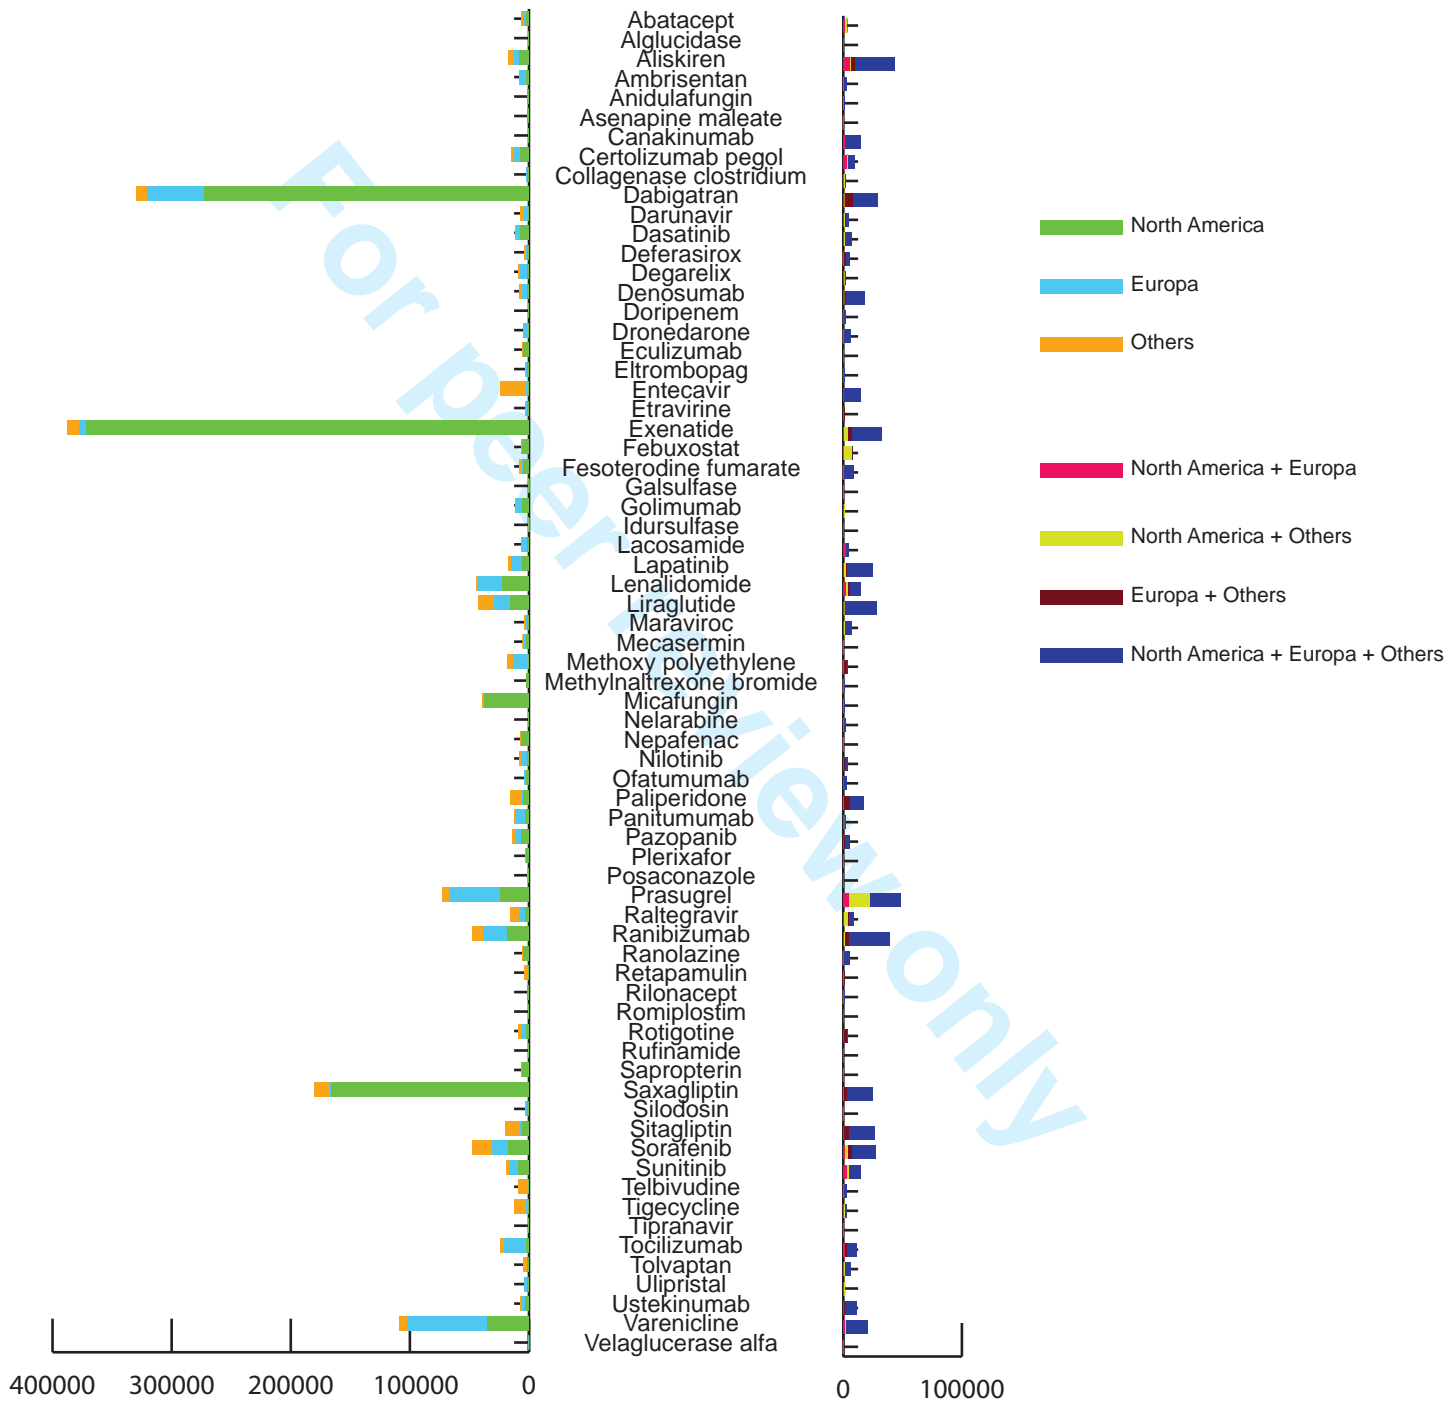

eTable. Planned enrollment of post-marketing trials by industry and non-industry funding for indications targeted in trials.

| Indication                                                            | Industry funding |                                                             | Non-industry funding |                                                            |
|-----------------------------------------------------------------------|------------------|-------------------------------------------------------------|----------------------|------------------------------------------------------------|
|                                                                       | No. of trials    | Planned enrollment                                          | No. of trials        | Planned enrollment                                         |
| <b>Originally approved indication</b>                                 | 2742             | Median [Q1-Q3]: 100 [33-323]<br>Mean (SD): 1322.0 (19921.8) | 1251                 | Median [Q1-Q3]: 60 [29.5-150]<br>Mean (SD): 230.9 (1771.2) |
| <b>Other indication(s)</b>                                            | 1310             | Median [Q1-Q3]: 45 [24-128]<br>Mean (SD): 167.7 (SD: 544.1) | 1131                 | Median [Q1-Q3]: 40 [21-70]<br>Mean (SD): 72.9 (148.0)      |
| <b>Both the originally approved indication and another indication</b> | 124              | Median [Q1-Q3]: 60 [30-224]<br>Mean (SD): 765.2 (2961.8)    | 121                  | Median [Q1-Q3]: 50 [30-120]<br>Mean (SD): 218.1 (934.9)    |

Data were missing for 9 industry-funded trials and 5 other trials.



# BMJ Open

## Post-marketing studies for novel drugs approved by both the FDA and EMA between 2005 and 2010: a cross-sectional study

|                                 |                                                                                                                                                                                                                                                                                                                                                                                                                                                                                                                                                                                                             |
|---------------------------------|-------------------------------------------------------------------------------------------------------------------------------------------------------------------------------------------------------------------------------------------------------------------------------------------------------------------------------------------------------------------------------------------------------------------------------------------------------------------------------------------------------------------------------------------------------------------------------------------------------------|
| Journal:                        | <i>BMJ Open</i>                                                                                                                                                                                                                                                                                                                                                                                                                                                                                                                                                                                             |
| Manuscript ID                   | bmjopen-2017-018587.R1                                                                                                                                                                                                                                                                                                                                                                                                                                                                                                                                                                                      |
| Article Type:                   | Research                                                                                                                                                                                                                                                                                                                                                                                                                                                                                                                                                                                                    |
| Date Submitted by the Author:   | 13-Sep-2017                                                                                                                                                                                                                                                                                                                                                                                                                                                                                                                                                                                                 |
| Complete List of Authors:       | Zeitoun, Jean-David; Hôtel Dieu Hospital, Epidémiologie Clinique; Saint-Antoine Hospital, Gastroenterology and Nutrition<br>Ross, Joseph; Yale University School of Medicine, Internal Medicine<br>Atal, Ignacio; Hotel Dieu Hospital, Epidémiologie Clinique<br>Vivot, Alexandre; Hotel Dieu Hospital, Epidémiologie Clinique<br>Downing, Nicholas; Brigham and Women's Hospital and Harvard Medical School, Medicine<br>Baron, Gabriel; INSERM U1153; Hôtel Dieu Hospital, Centre d'Epidémiologie Clinique<br>Ravaud, Philippe; Université Paris Descartes, Centre d'épidémiologie clinique; INSERM U1153 |
| <b>Primary Subject Heading</b>: | Pharmacology and therapeutics                                                                                                                                                                                                                                                                                                                                                                                                                                                                                                                                                                               |
| Secondary Subject Heading:      | Research methods, Public health                                                                                                                                                                                                                                                                                                                                                                                                                                                                                                                                                                             |
| Keywords:                       | THERAPEUTICS, STATISTICS & RESEARCH METHODS, EPIDEMIOLOGY                                                                                                                                                                                                                                                                                                                                                                                                                                                                                                                                                   |
|                                 |                                                                                                                                                                                                                                                                                                                                                                                                                                                                                                                                                                                                             |

SCHOLARONE™  
Manuscripts

1  
2  
3 **Post-marketing studies for novel drugs approved by both the FDA and EMA between**  
4  
5 **2005 and 2010: a cross-sectional study**  
6  
7

8 Jean-David Zeitoun, MD, MHPM, PhD candidate <sup>1,2,3</sup>, Joseph S. Ross, MD, MHS <sup>4,5,6,7</sup>,  
9  
10 Ignacio Atal, MSc <sup>1,8</sup>, Alexandre Vivot, MD, MPH, <sup>1,8</sup>, Nicholas S. Downing, MD <sup>9</sup>, Gabriel  
11  
12 Baron, PhD <sup>1,8,10</sup>, Philippe Ravaud, MD, PhD <sup>1,8,10,11</sup>  
13

- 14  
15  
16 1. Centre d'Épidémiologie Clinique, Hôpital Hôtel Dieu, Assistance Publique-Hôpitaux  
17 de Paris, Paris, France  
18  
19 2. Gastroenterology and Nutrition, Hôpital Saint-Antoine, Assistance Publiques-  
20 Hôpitaux de Paris, Paris, France  
21  
22 3. Proctology, Groupe Hospitalier Diaconesses-Croix Saint-Simon, Paris, France  
23  
24 4. Department of Internal Medicine, Robert Wood Johnson Foundation Clinical Scholars  
25 Program, Yale School of Medicine, New Haven, Connecticut, USA  
26  
27 5. Department of Internal Medicine, Section of General Internal Medicine, Yale School  
28 of Medicine, New Haven, Connecticut, USA  
29  
30 6. Department of Health Policy and Management, Yale School of Public Health, New  
31 Haven, Connecticut, USA  
32  
33 7. Center for Outcomes Research and Evaluation, Yale-New Haven Hospital, New  
34 Haven, Connecticut, USA  
35  
36 8. INSERM UMR 1153, Centre de Recherche Épidémiologie et Statistique Paris  
37 Sorbonne Cité (CRESS), METHODS Team, Paris, France  
38  
39 9. Department of Medicine, Brigham and Women's Hospital and Harvard Medical  
40 School, Boston, Massachusetts  
41  
42 10. Université Paris Descartes, Sorbonne Paris Cité, Paris, France  
43  
44 11. Department of Epidemiology, Columbia University Mailman School of Public Health,  
45 New York, New York, United States of America.  
46  
47  
48  
49  
50  
51  
52  
53  
54  
55  
56  
57  
58  
59  
60

1  
2  
3 **Corresponding author:** Dr. Jean-David Zeitoun, MD, MHPM, PhD candidate, Centre  
4  
5 d'Epidémiologie Clinique, Hôpital Hôtel Dieu, Assistance Publique-Hôpitaux de Paris, Paris,  
6  
7 France. E-mail: [jdzeitoun@yahoo.fr](mailto:jdzeitoun@yahoo.fr)  
8

9 **Word count:** 3736

10  
11 **Abstract:** 282

12  
13 **References:** 29

14  
15 **Figures:** 3

16  
17  
18 **Tables:** 2  
19  
20  
21  
22  
23  
24  
25  
26  
27  
28  
29  
30  
31  
32  
33  
34  
35  
36  
37  
38  
39  
40  
41  
42  
43  
44  
45  
46  
47  
48  
49  
50  
51  
52  
53  
54  
55  
56  
57  
58  
59  
60

**ABSTRACT**

**Objectives:** To characterize post-marketing studies for drugs that were newly approved by the US Food and Drug Administration (FDA) and the European Medicines Agency (EMA).

**Design and Setting:** Cross-sectional analysis of post-marketing studies registered in ClinicalTrials.gov until September 2014 for all novel drugs approved by both regulators between 2005 and 2010. Regulatory documents from both agencies were used.

**Primary and secondary outcome measures:** All identified post-marketing studies were classified according to planned enrolment, funding, status, and geographical location, and we determined whether studies studied the originally approved indication.

**Results:** Overall, 69 novel drugs approved between 2005 and 2010 were eligible for inclusion. A total of 6679 relevant post-marketing studies were identified; 5972 were interventional (89.4%). The median number of studies per drug was 55 (interquartile range [IQR]: 33-119) and median number of patients to be enrolled per study was 60 (IQR, 28-183). Industry was the primary sponsor of 2713 studies (40.6%) and was a primary or secondary sponsor in 4176 studies (62.5%). In all, 2901 studies (43.4%) were completed, 487 (7.3%) terminated, 1013 (15.2%) active yet not recruiting, 1895 (28.4%) recruiting, and 319 (4.8%) not yet recruiting. A total of 80% of studies were conducted in only one country and 84.4% took place in Europe and/or North America; 2561 (38.3%) studied another indication than the originally approved indication. Studies for which industry was a funder were less likely to assess the drug in another indication (54.6% vs. 68.6%;  $p < 0.0001$ ).

**Conclusions:** Post-marketing pharmaceutical research was highly variable and predominantly located in North America and Europe. Post-marketing studies were frequently designed to study indications other than the originally approved one. Although some findings were reassuring, others question the lack of coordination of post-marketing research.

### Strengths and limitations of this study

This is the first study to systematically assess clinical studies performed after marketing approval by the two leading regulators, namely the US Food and Drug Administration (FDA) and the European Medicines Agency (EMA).

This approach allowed us to examine a substantial number of post-marketing studies over a long time period.

However and due to registration bias, we cannot exclude that some true post-marketing studies were missed and therefore unanalyzed.

**Funding:** This research received no specific grant from any funding agency in the public, commercial or not-for-profit sectors.

**Competing interests:** Dr. Zeitoun reports that he serves as an advisor for several consulting firms and communication companies linked with the pharmaceutical industry (Cepton, Oliver Wyman, Roland Berger, McCann Healthcare, Omnicom, Grey Healthcare, Saatchi and Saatchi Healthcare, Sudler & Hennessey, TBWA, inVentiv Health France, Havas). He also reports compensation for lectures given to manufacturer professional associations; collaboration with Mayoly-Spindler, Merck, Teva, Johnson & Johnson, and Menarini; unpaid consultancy for EY; conducting workshops funded by Amgen; and being invited to a French medical congress by AbbVie. Dr. Ross receives support through Yale University from Johnson and Johnson to develop methods of clinical trial data-sharing; from the Centers of Medicare and Medicaid Services (CMS) to develop and maintain performance measures that are used for public reporting; from Medtronic, Inc. and the US FDA to develop methods for

1  
2  
3  
4  
5  
6  
7  
8  
9  
10  
11  
12  
13  
14  
15  
16  
17  
18  
19  
20  
21  
22  
23  
24  
25  
26  
27  
28  
29  
30  
31  
32  
33  
34  
35  
36  
37  
38  
39  
40  
41  
42  
43  
44  
45  
46  
47  
48  
49  
50  
51  
52  
53  
54  
55  
56  
57  
58  
59  
60

post-market surveillance of medical devices; from the Blue Cross Blue Shield Association to better understand medical technology evaluation; and from the Laura and John Arnold Foundation to support the Collaboration on Research Integrity and Transparency (CRIT) at Yale.

For peer review only

## Introduction

The US Food and Drug Administration (FDA) and the European Medicines Agency (EMA) are the two largest and most influential drug regulators worldwide. They tend to maintain similar premarket regulatory standards, and drug manufacturers probably tend to submit the same evidence to both as part of the premarket application process, even though we lack comparative data. Drug evaluation continues after regulatory approval, in particular through post-authorization requirements and commitments. The US FDA can use several regulatory instruments and harness various sources for post-marketing evaluation of approved drugs. Among them are the FDA Adverse Reporting System and the Sentinel System. [1] The EMA also has a set of post-authorization measures, from direct request by its dedicated committee, to specific obligations for certain drugs, all aiming at retrieving data for post-marketing assessment.[2] Yet these post-marketing clinical studies required by regulators are limited in number and are not consistently completed. [3–5] This situation raises the question of whether other studies of these drugs after regulatory approval, including those conducted by industry and independent investigators, but not to fulfill regulatory requirements, should be considered part of ongoing, continuous evaluation efforts.

Post-marketing studies are designed with different intent than are premarket trials. Their designs are not systematically submitted to regulatory agencies before initiation because many post-marketing studies are conducted by independent investigators, and their conduct is less rigorously regulated. [6] Post-marketing studies seek to evaluate safety regarding rare events, to assess the real-life effectiveness of novel drugs and to measure their long-term effects. They also permit drug evaluation in different populations, other indications for the same disease, other diseases or with different delivery systems or dosage forms. Moreover, although premarket trials are nearly exclusively sponsored by the manufacturers, post-marketing studies can be funded by manufacturers but also academic or other types of non-

1  
2  
3 profit institutions. Some research also suggested that a substantial proportion of post-  
4  
5 marketing trials, even those with results eventually published in high-impact-factor journals,  
6  
7 were designed for marketing purposes rather than medical interest. [7,8]  
8  
9

10  
11 Nevertheless, post-marketing studies have considerable influence on all stakeholders,  
12  
13 in particular researchers, practitioners and regulators or decision makers, because they provide  
14  
15 cumulative evidence regarding marketed products. However, we lack an overall assessment of  
16  
17 post-marketing studies regarding novel drugs. Post-marketing research has been studied for  
18  
19 high-risk devices [9] or even for drugs, but with a focused approach: safety [10,11] or given  
20  
21 therapeutic areas. [12–15] Some of those studies produced reassuring results, yet others  
22  
23 showed inconsistencies, with gaps in knowledge regarding some issues.  
24  
25

26  
27 Our research objective was to provide a comprehensive description of post-marketing  
28  
29 studies registered in ClinicalTrials.gov, a publicly-accessible clinical trial registry maintained  
30  
31 by the US National Institutes of Health over almost a decade for a sample of drugs approved  
32  
33 by both the FDA and EMA from 2005 to 2010. We aimed to characterize the total number of  
34  
35 studies and patients studied, targeted indications, funding origin, geographical location of  
36  
37 studies and status (e.g., completed or ongoing). We also sought to examine differences  
38  
39 between the condition of the initial label and the specific clinical condition studied in the post-  
40  
41 marketing studies, to assess the influence of the sponsor on the targeted indication, and to  
42  
43 describe supplemental indications.  
44  
45  
46  
47  
48  
49  
50  
51  
52  
53  
54  
55  
56  
57  
58  
59  
60



## Methods

### *Data sources and study sample*

We identified all novel drugs approved between January 1, 2005 and December 31, 2010 by both the FDA and EMA through its Centralized Authorization Procedure. For the FDA, Drugs@FDA is a publicly accessible database listing relevant regulatory actions for all approved drugs. [16] For the EMA, information was accessible in the European Public Assessment Reports, which provide a summary of scientific review and list notable regulatory events for all drug submissions.[17] Generic drugs, reformulations, combination therapies and non-therapeutic agents such as radiographic dye were not included. This first search led to a sample of 71 novel drugs approved by both regulators between 2005 and 2010. Two drugs, everolimus and temsirolimus, were excluded because they were associated with an abnormally high number of post-marketing studies involving drug-eluting stents.

### *Drug and manufacturer characteristics*

The following data were retrieved for each drug: agent type (small molecule or biologic), dates of regulatory submissions for both the FDA and EMA, orphan status according to the FDA, orphan designation from the EMA, therapeutic class according to the Anatomical Therapeutic Chemical classification, [18] initial label from both regulators, degree of novelty (first-in-class, advance-in-class, addition-to-class) as previously described in a paper from FDA officials [19] and size of the marketing-authorization holder (i.e., manufacturer). This latter information was obtained by personal communication with EMA officials (Dr. Constantinos Ziogas, Small and Medium-sized Manufacturer Office, EMA), who classified manufacturers as large pharmaceutical companies, intermediated-size companies or small- and medium-size companies according to the European Union definition based on headcount and financial turnover or balance sheet total.

### *Preapproval FDA pivotal trial characteristics*

We obtained data for the expected length of treatment and number of patients from pivotal efficacy trials supporting FDA approvals that had been collected for a previous work. [20] In brief, acute treatment was defined as expected use < 1 month, intermediate treatment as expected use from 1 month to 2 years, and chronic treatment as expected use > 2 years.

### *Post-marketing trials*

On September 24, 2014, we extracted all studies that were registered at ClinicalTrials.gov for each drug of our sample, regardless of dates and other details. We then excluded studies with the following characteristics: included in the FDA regulatory submission (by a manual review of Drugs@FDA), with inadequate registered status (expanded-access studies, withdrawn studies, suspended studies), and mistakenly extracted (i.e., studies actually not assessing the drug of interest). We decided that all studies whose starting date had preceded the first regulatory submission (to the FDA or EMA) by 1 year or less would be classified as post-marketing studies. Trials that pertained to more than one drug in our sample were manually reviewed so as to assign them to only one drug for the sake of further statistical analysis. Clinical judgment was applied to choose the “leading” drug in each study. When we could not determine the leading drug, we used the following rules. If the study was funded by a marketing-authorization holder of one of the drugs, this drug was considered the leading drug. Otherwise, if the study involved a drug that was assessed for another indication than the originally approved indication, this drug was considered the leading drug. Finally, when no leading drug could be determined, the drug for which the last regulatory approval had been granted was considered the drug tested and was classified as the leading drug.

For all remaining post-marketing studies, the following data were collected: condition studied, starting date, study sponsors (as a primary sponsor or a collaborator), status at the

1  
2  
3 date of extraction (not yet recruiting, recruiting, active yet not recruiting, enrolling by  
4 invitation, completed, terminated), number and list of countries, number of centers, study  
5 phase, study type (observational or interventional), randomization, and planned enrollment. In  
6 addition, studies were classified as assessing the drug for its originally approved indication or  
7 not, depending on the initial label. When the initial label differed between the FDA and EMA,  
8 we accepted both labels as defining the originally approved indication. One of us (JDZ)  
9 performed this classification after careful review of each primary label.  
10  
11  
12  
13  
14  
15  
16  
17

### 18 *Supplemental indications*

19  
20 We also collected approvals of supplemental indications by the FDA during the study period  
21 (2005-2014) by manual review of Drugs@FDA. In the “Approval date(s) and History,  
22 Letters, Labels, Reviews” section, all events designated as “efficacy-new indication” or  
23 “efficacy” were reviewed and retained if deemed appropriate. Labeling revision (such as those  
24 related to a modified indication or an expanded patient population) and manufacturing change  
25 or addition were not included, nor were irrelevant supplemental indications. We also aimed to  
26 assess the average number of patients to be enrolled in post-marketing studies to gain  
27 approval of a supplemental indication. For this purpose, we took into account all patients from  
28 all post-marketing studies from the start of our sample through 1 year before the issuance of  
29 the supplemental indication by the FDA.  
30  
31  
32  
33  
34  
35  
36  
37  
38  
39  
40  
41  
42

### 43 *Statistical analysis*

44  
45 Using descriptive statistics, we characterized the premarket characteristics of the novel drugs  
46 included in our sample (drugs approved by both the FDA and EMA between 2005 and 2010).  
47  
48 Next, we used descriptive statistics to characterize features of all identified post-marketing  
49 studies registered at ClinicalTrials.gov for all novel drugs. We used a series of trend charts  
50 representing the annual number of post-marketing studies over the life-cycle of the drugs  
51  
52  
53  
54  
55  
56  
57  
58  
59  
60

1  
2  
3 according to off- and on-condition studies. All statistical tests were two-tailed, with a type I  
4 error rate of 0.05. We used SAS 9.4 (SAS Institute; Cary, NC) for all statistical analyses.  
5  
6  
7

## 8 9 **Results**

### 10 *Drug sample*

11  
12 Our study sample included 69 novel drugs approved between 2005 and 2010 by both the FDA  
13 and EMA. In all, 51 drugs (73.9%) were small molecules and 18 (26.1%) were biologics  
14 (Table 1). The FDA had granted orphan status to 18 drugs (26.1%) and the EMA an orphan  
15 designation to 20 (29.0%). Among these 69 novel drugs, 24 (34.8%) were first-in-class, 24  
16 (34.8%) advance-in-class and 21 (30.4%) addition-to-class. The most prevalent therapeutic  
17 category was antineoplastic and immunomodulating agents (29% of all novel drugs from the  
18 sample) and many drugs (68.1%) were for chronic treatment. The manufacturer was a large  
19 pharmaceutical company for 44 (63.8%) of the drugs. Other details are in Table 1.  
20  
21  
22  
23  
24  
25  
26  
27  
28  
29  
30  
31

### 32 *Number of post-marketing trials, status and patients recruited*

33  
34  
35 Sequential exclusions leading to our final study sample of 6679 relevant post-marketing  
36 studies related to all 69 novel drugs are in Supplemental Material (S1). Characteristics of all  
37 post-marketing studies are in Table 2. In all, 2901 studies (43.4%) were completed, 487  
38 (7.3%) terminated, 1013 (15.2%) active yet not recruiting, 1895 (28.4%) recruiting, and 319  
39 (4.8%) not yet recruiting. When comparing respective numbers of post-marketing studies and  
40 all clinical studies (preapproval pivotal trials and post-marketing studies), the median  
41 proportion of post-marketing studies per drug was 0.91 (interquartile range [IQR] 0.88-0.96).  
42  
43 However, we found high variability in number of post-marketing studies per drug, with a  
44 median of 55 studies per drug (IQR, 33-119) and mean of 96.8 studies per drug (SD 110.3).  
45  
46 Galsulfase, an orphan medication indicated for Mucopolysaccharidosis VI, was associated  
47 with the lowest number of post-marketing studies (n=3) and sorafenib, a tyrosine kinase  
48  
49  
50  
51  
52  
53  
54  
55  
56  
57  
58  
59  
60

1  
2  
3 inhibitor initially indicated for kidney cancer, with the highest number of post-marketing  
4  
5 studies (n=530).  
6

7  
8 Planned enrollment was also highly variable, with studies only including one patient, and one  
9  
10 study intending to recruit 904 585 patients (actually a prospective population-based cohort  
11  
12 study examining risk of congenital malformations after use of varenicline, a tobacco-use  
13  
14 cessation drug, in pregnant women). However, the median number of patients to be enrolled  
15  
16 per study was 60 (IQR 28-183). Data on the total population to be enrolled in all post-  
17  
18 marketing studies for a given drug was also highly varied, with a median total sample of  
19  
20 15 418 patients (IQR 4932-37 523). Velaglucerase alfa, an orphan medication indicated for  
21  
22 Gaucher disease, was associated with the lowest population size to be included in studies  
23  
24 (n=67), and varenicline was associated with the greatest population to be enrolled (>1 million  
25  
26 patients overall). Supplemental Material (S2) shows the total number of patients to be  
27  
28 included in post-marketing studies for each drug and proportions of industry and non-industry  
29  
30 funders.  
31  
32  
33  
34

35  
36 Supplemental Material (S3) presents for each drug the number of patients included in  
37  
38 preapproval pivotal trials as compared with post-marketing studies. The median proportion  
39  
40 for the population recruited in post-marketing studies to the total population (i.e., preapproval  
41  
42 samples and post-marketing studies) was 0.92 (IQR 0.85-0.96). Again, alglucidase and  
43  
44 velaglucerase alfa were associated with the lowest number of patients in preapproval pivotal  
45  
46 trials. In contrast, for dabigatran, a drug initially indicated for preventing venous  
47  
48 thromboembolism in the European Union and to reduce the risk of stroke and systemic  
49  
50 embolism in patients with non-valvular atrial fibrillation in the United States, preapproval  
51  
52 pivotal trials had recruited the highest number of patients. The same figure also shows the  
53  
54 proportions of patients enrolled in post-marketing studies designed for the originally approved  
55  
56 indication, another indication and both.  
57  
58  
59  
60

### *Trial characteristics*

Data regarding study phases are shown in Table 2; only 18.6% of identified post-marketing studies were considered phase IV studies, whereas the most prevalent category was phase II studies (32.6%). Data regarding randomization were missing for 2452 post-marketing studies (36.7%). Among the remaining studies for which these data were available, 3067 were randomized (72.6%). Other data are in Table 2.

### *Sponsor*

Industry funded or partially funded nearly two-thirds of post-marketing studies. Indeed, as shown in Table 2, industry was the primary sponsor of 2713 studies (40.6%), but when also considering manufacturers as minority funders, industry was involved in a total of 4176 studies (62.5%). Data regarding post-marketing studies stratified by sponsorship are in Table 2. Figure 1 presents the drug sample with respect to the number of post-marketing studies and the proportion of industry and non-industry funders for each drug. Supplemental Material (S4) provides the same information but with a 4-year follow-up for each drug.

### *Conditions addressed in trials*

Review of indications showed that 2441 post-marketing studies (36.5%) were launched for another indication than the originally approved indication. Figure 2 displays the number of non-approved indications studied in post-marketing studies for each drug of our sample, with information regarding the more advanced phase for each newly targeted indication. When comparing those studies with the total number of clinical studies (preapproval pivotal trials and post-marketing studies), we found a median proportion of 0.24 (IQR, 0.09-0.42). The median proportion for the population recruited in post-marketing studies designed for another indication than the originally approved indication to the total population from all clinical studies (preapproval pivotal trials and post-marketing studies) was 0.11 (IQR 0.03-0.30).

1  
2  
3 When analyzing the relationship between the study sponsor and the study indication, we  
4  
5 found that studies for which industry was a sole or partial funder were less likely to assess the  
6  
7 drug for another indication than the originally approved indication (54.6% of studies with  
8  
9 industry funding vs 68.6% without industry funding;  $p < 0.0001$ ). Findings regarding planned  
10  
11 enrollment according to the indication and stratified on funding origin are in Supplemental  
12  
13 Material (eTable). Regardless of the funder, post-marketing studies targeting originally  
14  
15 approved indications planned to enroll more patients than those studying other indications.  
16  
17

### 18 19 *Timing*

20  
21  
22 The annual number of post-marketing studies over the life-cycle of drugs, stratified by  
23  
24 indication, is shown in Figure 3, exhibiting an asymmetric bell pattern, with a rapid increase  
25  
26 in number of post-marketing studies launched, a peak of activity within the third year after the  
27  
28 first regulatory submission, then a progressive decline in number of launched studies.  
29

30  
31 Detailed examination shows a greater proportion of studies designed for another indication  
32  
33 than the originally approved indication at the beginning and end of drug life-cycles.  
34

35  
36 Supplemental Material (S5) is based on the same data but displays information regarding  
37  
38 sponsors. Former post-marketing studies were predominantly funded by industry versus  
39  
40 academic or not-for-profit entities and this proportion increased until the second year after the  
41  
42 first regulatory submission. Afterwards, the proportion of non-industry funders tended to  
43  
44 increase over time.  
45

### 46 47 *Location*

48  
49  
50 Overall, 80% of post-marketing studies were conducted in only one country. For 66 drugs, at  
51  
52 least one study was conducted in at least two countries. Sorafenib was the most concerned  
53  
54 drug in this regard, with 74 studies involving at least two countries. Data regarding locations  
55  
56 of studies for each drug are in Supplemental Material (S6). In brief, post-marketing research  
57  
58  
59  
60

1  
2  
3 was highly concentrated in North America (i.e., United States and/or Canada; 44.8% of all  
4 post-marketing studies of the sample) and Europe (25.0%). Post-marketing studies conducted  
5 in other areas represented 15.6% of all studies, and studies conducted in multiple continents  
6 were few. When examining the relation between study location and study design with respect  
7 to the original label, we found that studies from North America (United States and/or Canada)  
8 were more frequently conducted for indications other than the originally approved indication  
9 versus those located in Europe (50.4% v. 36.9%).  
10  
11  
12  
13  
14  
15  
16  
17  
18

### 19 *Supplemental indications*

20  
21  
22 During the study period, 18 novel drugs (26.1%) were associated with a least a supplemental  
23 indication by the FDA: one with 4 supplemental indications, one with 3 supplemental  
24 indications, 5 with two supplemental indications and 11 with one supplemental indication.  
25  
26  
27  
28

29 The mean time between the first regulatory submission and subsequent supplemental  
30 indication was 4.4 years (SD 1.7; IQR 3.3-5.7). The mean number of patients to be enrolled in  
31 post-marketing studies before approval of a supplemental indication was 12763.1 (SD  
32 12474.3; IQR 3891.0-15856.0).  
33  
34  
35  
36  
37  
38

### 39 **Discussion**

40  
41 In our study of post-marketing clinical research studies conducted for novel drugs approved  
42 by both the FDA and EMA between 2005 and 2010, we found high variability in number of  
43 post-marketing studies per drug and planned enrollment per study. Indeed, the median  
44 planned enrollment was low, 60 patients, with a median of 55 studies per drug, most of which  
45 had not yet been completed at a minimum of 4 years after approval. Locations were  
46 concentrated, with 72.3% of post-marketing studies conducted in North America and/or  
47 Europe and 80% conducted in only one country. Approximately 40% of post-marketing  
48 studies were designed for an indication other than the originally approved one, more  
49  
50  
51  
52  
53  
54  
55  
56  
57  
58  
59  
60



1  
2  
3 frequently concerning studies not involving industry funding. Overall, those findings reflect  
4  
5 the lack of global coordination of post-marketing research for novel drugs.  
6  
7

8 Our study has several strengths. First, we focused on a sample of drugs approved by  
9  
10 the two leading medical product regulators, FDA and EMA, which suggests that these drugs  
11  
12 are likely to be of the greatest interest and importance to clinicians worldwide. Most previous  
13  
14 studies focused on the FDA or EMA but rarely both. [20,21] Second, few comprehensive  
15  
16 studies have analyzed post-marketing research despite its undisputed public health impact. [9–  
17  
18 14] Most research focused on safety or was limited to a given therapeutic area, or even only  
19  
20 one drug. In addition, we chose a large study period, with a 6-year span for drug approvals,  
21  
22 and more than 10 years for the trial sample. Moreover, we followed a rigorous method for  
23  
24 selecting post-marketing studies, excluding clinical trials included in the FDA submission,  
25  
26 studies that had not been launched, studies mistakenly classified as involving the drug in  
27  
28 ClinicalTrials.gov and studies whose starting date was too early as compared to regulatory  
29  
30 submission. Third, we provide unique insights into the clinical research programs examining  
31  
32 non-approved drug uses. Many studies have investigated off-label prescriptions, [22,23] but  
33  
34 we used a slightly different approach. In effect, most drug labels are stringently phrased so as  
35  
36 to be rigorously aligned to pivotal trial criteria. [24] Therefore, categorizing studies according  
37  
38 to the actual off- or on-label status of the drug investigated would have led to classifying most  
39  
40 as involving off-label drug use. Put another way, the label was judged too narrow, and our  
41  
42 method offers a more significant picture for clinicians and epidemiologists. We believe that  
43  
44 our classification better reflects substantial evolution regarding the initially authorized use of  
45  
46 novel drugs.  
47  
48  
49  
50  
51  
52

53 Our findings raise several issues worthy of consideration about post-marketing  
54  
55 research. First, we showed that post-marketing research is both a heterogeneous and  
56  
57 concentrated landscape, probably linked to its loose regulation [6] and to market forces.  
58  
59  
60

1  
2  
3 Therefore, most initiatives are at the discretion of funders, either industry or academic  
4  
5 institutions, and driven by various factors not necessarily linked to medical need or relevancy.  
6  
7 For instance, prior research has shown that many post-marketing trials were “seeding trials”,  
8  
9 designed for marketing purposes rather than scientific relevancy. [7,8] The number of post-  
10  
11 marketing studies per novel drug and planned enrollment were highly variable, but most  
12  
13 studies were conducted in only one country and North America and Europe were by far the  
14  
15 most frequent locations. Median planned enrollment was low and many studies were still not  
16  
17 completed at the time of data acquisition. These findings question the absence of steering or  
18  
19 the lack of effectiveness or incentive policies for post-marketing research. Second, almost  
20  
21 40% of post-marketing studies were designed for an indication other than the originally  
22  
23 approved indication, with non-industry trials more likely concerned. Although industry has  
24  
25 been blamed for testing their products in a too-liberal manner, [25] our findings suggest that  
26  
27 academics and other non-industry bodies might be more prone to assess authorized drugs in  
28  
29 innovative ways to evaluate novel indications. Third, we found that post-marketing studies  
30  
31 designed for the originally approved indication planned to enroll a greater number of patients  
32  
33 on average than those targeting novel indications. This latter finding is somewhat reassuring  
34  
35 because post-marketing studies for an already approved indication aim to refine knowledge  
36  
37 regarding the long-term effect and/or safety and should therefore include more patients than  
38  
39 preapproval pivotal trials.  
40  
41  
42  
43  
44

45  
46 Our study has limitations. The first may be a registration bias at ClinicalTrials.gov,  
47  
48 which would alter the exhaustiveness of our assessment. Some studies are not registered by  
49  
50 researchers [26,27] and were therefore not included in our study. Others are imperfectly  
51  
52 registered, with some information missing. However, ClinicalTrials.gov is widely recognized  
53  
54 as a benchmark registry, and recent reports showed that compliance might have improved  
55  
56 over time. [28] Another limitation is the definition of post-marketing studies, in that clinical  
57  
58  
59  
60

1  
2  
3 studies are designed and launched according to a continuous timing and a single threshold  
4  
5 might be lacking for distinguishing pre- and post-marketing trials. Therefore, we decided to  
6  
7 consider studies starting at most 1 year before the first regulatory submission as post-  
8  
9 marketing studies even though we could have made another choice. A third limitation is  
10  
11 related to data sources. For some data, we relied on only one of the two selected regulators.  
12  
13 We used such an approach for the sake of convenience and recognize that this could be  
14  
15 interpreted as a bias, yet to our knowledge, there are very few if any differences in data  
16  
17 between the two studied regulators. Therefore, this latter limitation in the methods seems  
18  
19 unlikely to affect our findings. Finally, we could not identify whether post-marketing trials  
20  
21 were relevant or useful because we did not analyze their design, endpoints, or comparators,  
22  
23 among other factors.  
24  
25  
26

27  
28 In conclusion, our research shows that post-marketing research is highly variable and  
29  
30 concentrated, with on one hand, great differences in the number of post-marketing studies per  
31  
32 drug and in planned enrollment and on the other, most studies being conducted in only one  
33  
34 country, with North America and Europe the most represented locations. Approximately 40%  
35  
36 of post-marketing studies assessed the drug for an indication other than the originally  
37  
38 approved indication, more frequently non-industry studies. Even though some of our findings  
39  
40 can be seen as reassuring, others underline the lack of global coordination of post-marketing  
41  
42 research for novel drugs despite the undisputed influence of such research.  
43  
44  
45  
46  
47  
48

49 **Contributors:** Dr. Zeitoun and Pr. Ravaud were responsible for the conception and design of  
50  
51 this work. Dr. Zeitoun drafted the manuscript and was responsible for most of the data  
52  
53 acquisition. M. Ignacio Atal was responsible for data exportation and structuration. Dr.  
54  
55 Nicholas Downing was responsible for some of the data acquisition. Dr. Gabriel Baron  
56  
57  
58  
59  
60

1  
2  
3 conducted the statistical analysis. Drs. Ross and Ravaud provided supervision. All authors  
4 participated in the analysis and interpretation of the data and critically revised the manuscript  
5 for important intellectual content.  
6  
7  
8

9  
10 **Data sharing statement:** Data files are available from the corresponding author on  
11 reasonable request.  
12  
13

14  
15 **Acknowledgements:** The authors are grateful to EMA officials who graciously helped them  
16 classify drug manufacturers. They also thank Geoffroy Beraud-Chaulet for his useful work on  
17 Drugs@FDA and Elise Diard for her invaluable help on figures.  
18  
19  
20  
21

## 22 23 24 25 26 27 28 29 30 31 32 33 34 35 36 37 38 39 40 41 42 43 44 45 46 47 48 49 50 51 52 53 54 55 56 57 58 59 60

### References

1 Ball R, Robb M, Anderson S, *et al.* The FDA's sentinel initiative—A comprehensive  
2 approach to medical product surveillance. *Clin Pharmacol Ther* 2016;**99**:265–8.

3 doi:10.1002/cpt.320

4 European Medicines Agency. Post-authorisation procedural Q&A - Post-authorisation  
5 measures: questions and answers.

6 [http://www.ema.europa.eu/ema/index.jsp?curl=pages/regulation/q\\_and\\_a/q\\_and\\_a\\_detail\\_000](http://www.ema.europa.eu/ema/index.jsp?curl=pages/regulation/q_and_a/q_and_a_detail_000037.jsp)  
7 037.jsp (accessed 8 Sep 2017).

8 United States Government Accountability Office. Drug Safety: FDA Expedites Many  
9 Applications, But Data for Postapproval Oversight Need Improvement. 2015.

10 <http://www.gao.gov/products/GAO-16-192> (accessed 15 Nov 2016).

11 Fain K, Daubresse M, Alexander G. The food and drug administration amendments  
12 act and postmarketing commitments. *JAMA* 2013;**310**:202–4. doi:10.1001/jama.2013.7900

1  
2  
3 5 Hoekman J, Klamer TT, Mantel-Teeuwisse AK, *et al.* Characteristics and follow-up of  
4 postmarketing studies of conditionally authorized medicines in the EU. *Br J Clin Pharmacol*  
5 2016;**82**:213–26. doi:10.1111/bcp.12940  
6  
7  
8

9  
10 6 London AJ, Kimmelman J, Carlisle B. Research ethics. Rethinking research ethics: the  
11 case of postmarketing trials. *Science* 2012;**336**:544–5. doi:10.1126/science.1216086  
12  
13

14  
15 7 Alexander GC. Seeding trials and the subordination of science. *Arch Intern Med*  
16 2011;**171**:1107–8. doi:10.1001/archinternmed.2011.232  
17  
18

19  
20 8 Barbour V, Burch D, Godlee F, *et al.* Characterisation of trials where marketing  
21 purposes have been influential in study design: a descriptive study. *Trials* 2016;**17**:31.  
22  
23  
24  
25  
26  
27  
28  
29  
30  
31  
32  
33  
34  
35  
36  
37  
38  
39  
40  
41  
42  
43  
44  
45  
46  
47  
48  
49  
50  
51  
52  
53  
54  
55  
56  
57  
58  
59  
60

9  
10  
11  
12  
13  
14  
15  
16  
17  
18  
19  
20  
21  
22  
23  
24  
25  
26  
27  
28  
29  
30  
31  
32  
33  
34  
35  
36  
37  
38  
39  
40  
41  
42  
43  
44  
45  
46  
47  
48  
49  
50  
51  
52  
53  
54  
55  
56  
57  
58  
59  
60

10  
11  
12  
13  
14  
15  
16  
17  
18  
19  
20  
21  
22  
23  
24  
25  
26  
27  
28  
29  
30  
31  
32  
33  
34  
35  
36  
37  
38  
39  
40  
41  
42  
43  
44  
45  
46  
47  
48  
49  
50  
51  
52  
53  
54  
55  
56  
57  
58  
59  
60

11  
12  
13  
14  
15  
16  
17  
18  
19  
20  
21  
22  
23  
24  
25  
26  
27  
28  
29  
30  
31  
32  
33  
34  
35  
36  
37  
38  
39  
40  
41  
42  
43  
44  
45  
46  
47  
48  
49  
50  
51  
52  
53  
54  
55  
56  
57  
58  
59  
60

12  
13  
14  
15  
16  
17  
18  
19  
20  
21  
22  
23  
24  
25  
26  
27  
28  
29  
30  
31  
32  
33  
34  
35  
36  
37  
38  
39  
40  
41  
42  
43  
44  
45  
46  
47  
48  
49  
50  
51  
52  
53  
54  
55  
56  
57  
58  
59  
60

- 1  
2  
3 13 Yeh RW, Kennedy K, Spertus JA, *et al.* Do postmarketing surveillance studies  
4 represent real-world populations? A comparison of patient characteristics and outcomes after  
5 carotid artery stenting. *Circulation* 2011;**123**:1384–90.  
6  
7 doi:10.1161/CIRCULATIONAHA.110.991075  
8  
9  
10  
11  
12 14 Inrig JK, Califf RM, Tasneem A, *et al.* The landscape of clinical trials in nephrology:  
13 a systematic review of Clinicaltrials.gov. *Am J Kidney Dis Off J Natl Kidney Found*  
14 2014;**63**:771–80. doi:10.1053/j.ajkd.2013.10.043  
15  
16  
17  
18  
19 15 Endrikat J, Vogtlaender K, Dohanish S, *et al.* Safety of Gadobutrol: Results From 42  
20 Clinical Phase II to IV Studies and Postmarketing Surveillance After 29 Million Applications.  
21  
22 *Invest Radiol* 2016;**51**:537–43. doi:10.1097/RLI.0000000000000270  
23  
24  
25  
26  
27 16 Drugs@FDA: FDA Approved Drug Products.  
28  
29 <http://www.accessdata.fda.gov/scripts/cder/drugsatfda/index.cfm> (accessed 15 Nov 2016).  
30  
31  
32 17 European Medicines Agency - Find medicine - European public assessment reports.  
33  
34 [http://www.ema.europa.eu/ema/index.jsp?curl=pages/medicines/landing/epar\\_search.jsp&mid](http://www.ema.europa.eu/ema/index.jsp?curl=pages/medicines/landing/epar_search.jsp&mid=WC0b01ac058001d124)  
35 [=WC0b01ac058001d124](http://www.ema.europa.eu/ema/index.jsp?curl=pages/medicines/landing/epar_search.jsp&mid=WC0b01ac058001d124) (accessed 15 Nov 2016).  
36  
37  
38  
39 18 World Health Organization (WHO) Collaborating Center for Drug Statistics  
40  
41 Methodology. ATC classification index with DDDs, 2014.  
42  
43 2014.[http://www.whocc.no/atc\\_ddd\\_index/](http://www.whocc.no/atc_ddd_index/)  
44  
45  
46  
47 19 Lanthier M, Miller KL, Nardinelli C, *et al.* An Improved Approach To Measuring  
48  
49 Drug Innovation Finds Steady Rates Of First-In-Class Pharmaceuticals, 1987–2011. *Health*  
50  
51 *Aff (Millwood)* 2013;**32**:1433–9. doi:10.1377/hlthaff.2012.0541  
52  
53  
54  
55  
56  
57  
58  
59  
60

1  
2  
3 20 Downing NS, Aminawung JA, Shah ND, *et al.* Clinical trial evidence supporting FDA  
4 approval of novel therapeutic agents, 2005-2012. *JAMA* 2014;**311**:368–77.

5  
6  
7 doi:10.1001/jama.2013.282034

8  
9  
10 21 Zeitoun J-D, Lefèvre JH, Downing NS, *et al.* Regulatory review time and post-market  
11 safety events for novel medicines approved by the EMA between 2001 and 2010: a cross-  
12 sectional study. *Br J Clin Pharmacol* 2015;**80**:716–26. doi:10.1111/bcp.12643

13  
14  
15 22 Eguale T, Buckeridge DL, Verma A, *et al.* Association of Off-label Drug Use and  
16 Adverse Drug Events in an Adult Population. *JAMA Intern Med* 2016;**176**:55–63.

17  
18  
19  
20  
21  
22 doi:10.1001/jamainternmed.2015.6058

23  
24  
25 23 Danés I, Agustí A, Vallano A, *et al.* Outcomes of off-label drug uses in hospitals: a  
26 multicentric prospective study. *Eur J Clin Pharmacol* 2014;**70**:1385–93. doi:10.1007/s00228-  
27 014-1746-2

28  
29  
30  
31  
32 24 Eichler H-G, Abadie E, Breckenridge A, *et al.* Bridging the efficacy-effectiveness gap:  
33 a regulator's perspective on addressing variability of drug response. *Nat Rev Drug Discov*  
34 2011;**10**:495–506. doi:10.1038/nrd3501

35  
36  
37  
38  
39 25 Smith R, Gøtzsche PC, Groves T. Should journals stop publishing research funded by  
40 the drug industry? *BMJ* 2014;**348**:g171.

41  
42  
43  
44  
45 26 Boccia S, Rothman KJ, Panic N, *et al.* Registration practices for observational studies  
46 on ClinicalTrials.gov indicated low adherence. *J Clin Epidemiol* 2016;**70**:176–82.

47  
48  
49  
50  
51  
52 doi:10.1016/j.jclinepi.2015.09.009

53 27 Dal-Ré R, Ross JS, Marušić A. Compliance with prospective trial registration  
54 guidance remained low in high-impact journals and has implications for primary end point  
55 reporting. *J Clin Epidemiol* 2016;**75**:100–7. doi:10.1016/j.jclinepi.2016.01.017

1  
2  
3 28 Viergever RF, Li K. Trends in global clinical trial registration: an analysis of numbers  
4 of registered clinical trials in different parts of the world from 2004 to 2013. *BMJ Open*  
5 2015;**5**:e008932. doi:10.1136/bmjopen-2015-008932  
6  
7  
8

9  
10 29 Lozano R, Naghavi M, Foreman K, *et al*. Global and regional mortality from 235  
11 causes of death for 20 age groups in 1990 and 2010: a systematic analysis for the Global  
12 Burden of Disease Study 2010. *The Lancet* 2012;**380**:2095–128. doi:10.1016/S0140-  
13 6736(12)61728-0  
14  
15  
16  
17  
18  
19  
20  
21  
22  
23  
24  
25  
26  
27  
28  
29  
30  
31  
32  
33  
34  
35  
36  
37  
38  
39  
40  
41  
42  
43  
44  
45  
46  
47  
48  
49  
50  
51  
52  
53  
54  
55  
56  
57  
58  
59  
60



## Legends

Figure 1: Number of post-marketing studies and respective proportion of industry and non-industry funders.

Figure 2: Number of non-approved indications targeted in post-marketing studies for each drug of our study sample. Indications are rank-ordered on the basis of the number of post-marketing studies launched (from the greatest number of post-marketing studies on the left side of the figure to the lowest number on the right side). Color of boxes varies according to the advanced phase of the targeted indication. Indications are classified according to the Global Burden of Diseases classification. [29] Indications belonging to residual categories or health conditions not relevant to the Global Burden of Diseases were excluded and therefore are not represented in the Figure.

Figure 3: Annual number of post-marketing studies over the life-cycle of drugs, stratified by indication.

Supplemental File S1: Flow chart leading to the final study sample of 6679 relevant post-marketing studies.

Supplemental File S2: Total number of patients to be included in post-marketing studies for each drug.

Supplemental File S3: Population in preapproval pivotal trials and post-marketing studies.

Supplemental File S4: Number of post-marketing studies and respective proportion of industry and non-industry funders, with a 4-year follow-up for each drug.

1  
2  
3  
4  
5  
6  
7  
8  
9  
10  
11  
12  
13  
14  
15  
16  
17  
18  
19  
20  
21  
22  
23  
24  
25  
26  
27  
28  
29  
30  
31  
32  
33  
34  
35  
36  
37  
38  
39  
40  
41  
42  
43  
44  
45  
46  
47  
48  
49  
50  
51  
52  
53  
54  
55  
56  
57  
58  
59  
60

Supplemental File S5: Annual number of post-marketing studies over the life-cycle of drugs, stratified by sponsor.

Supplemental File S6: Locations of post-marketing studies.

Supplemental File S7: Data from S2, S3 and S6, presented as tables.

For peer review only

Table 1. Characteristics of 69 novel drugs approved by both the FDA and EMA between 2005 and 2010 (excluding everolimus and temsirolimus).

| Characteristics                                               | n (%)      |
|---------------------------------------------------------------|------------|
| <b>Agent type</b>                                             |            |
| Small molecule                                                | 51 (73.9%) |
| Biologic                                                      | 18 (26.1%) |
| Orphan status (FDA)                                           | 18 (26.1%) |
| Orphan designation (EMA)                                      | 20 (29.0%) |
| Accelerated approval (FDA)                                    | 14 (20.3%) |
| <b>Therapeutic class according to the ATC classification</b>  |            |
| Alimentary tract and metabolism                               | 10 (14.5%) |
| Anti-infectives for systemic use                              | 12 (17.4%) |
| Antineoplastic and immunomodulating agents                    | 20 (29.0%) |
| Blood and blood forming organs                                | 5 (7.2%)   |
| Cardiovascular system                                         | 5 (7.2%)   |
| Nervous system                                                | 6 (8.7%)   |
| Other*                                                        | 11 (15.9%) |
| <b>Degree of novelty (according to Lanthier <i>et al</i>)</b> |            |
| First-in-class                                                | 24 (34.8%) |
| Advance-in-class                                              | 24 (34.8%) |
| Addition-to-class                                             | 21 (30.4%) |
| <b>Size of the marketing-authorization holder</b>             |            |
| Large pharmaceutical company                                  | 44 (63.8%) |
| Intermediated-size company                                    | 23 (33.3%) |
| Small- and medium-size company                                | 2 (2.9%)   |
| <b>Premarket evidence</b>                                     |            |

|                                     |                |
|-------------------------------------|----------------|
| Total no. of included patients      |                |
| Min/max                             | 18/18040       |
| Median [Q1-Q3]                      | 923 [324-1996] |
| Mean (SD)                           | 1806 (2897)    |
| <b>Expected length of treatment</b> |                |
| Acute                               | 8 (11.6%)      |
| Intermediate                        | 14 (20.3%)     |
| Chronic                             | 47 (68.1%)     |

ATC, Anatomical Therapeutic Chemical

\*includes dermatological, genitourinary system and sex hormones, musculoskeletal system, sensory organs, systemic hormonal preparations, excluding sex hormones, and others

Table 2. Characteristics of industry and non-industry post-marketing studies registered at ClinicalTrials.gov before September 24, 2014 for the 69 novel drugs in the study sample.

| Characteristics                                                        |                |                    | Industry studies | Non-industry studies |
|------------------------------------------------------------------------|----------------|--------------------|------------------|----------------------|
| <b>Primary sponsor</b>                                                 | Industry       | 2713 (40.6%)       |                  |                      |
|                                                                        | NIH            | 286 (4.3%)         |                  |                      |
|                                                                        | US Fed         | 15 (0.2%)          |                  |                      |
|                                                                        | Other          | 3665 (54.9%)       |                  |                      |
| <b>Industry involved either as a primary sponsor or a collaborator</b> |                | 4176 (62.5%)       |                  |                      |
| <b>No. of post-marketing studies per drug</b>                          | Min/max        | 3/530              |                  |                      |
|                                                                        | Median [Q1-Q3] | 55 [30-119]        |                  |                      |
|                                                                        | Mean (SD)      | 96.8 (110.3)       |                  |                      |
| <b>Population size per drug</b>                                        | Min/max        | 67/1.05E6          |                  |                      |
|                                                                        | Median [Q1-Q3] | 15418 [4932-37523] |                  |                      |
|                                                                        | Mean (SD)      | 62748 (166644)     |                  |                      |

|                                                   |                                                                |              |              |              |
|---------------------------------------------------|----------------------------------------------------------------|--------------|--------------|--------------|
| <b>Therapeutic class according to the ATC</b>     |                                                                |              |              |              |
| Alimentary tract and metabolism                   |                                                                | 832 (12.5%)  | 570 (68.5%)  | 262 (31.5%)  |
| Anti-infectives for systemic use                  |                                                                | 828 (12.4%)  | 504 (60.9%)  | 324 (39.1%)  |
| Antineoplastic and immunomodulating agents        |                                                                | 3040 (45.5%) | 1818 (59.8%) | 1222 (40.2%) |
| Blood and blood forming organs                    |                                                                | 446 (6.7%)   | 277 (62.1%)  | 169 (37.9%)  |
| Nervous system                                    |                                                                | 485 (7.3%)   | 304 (62.7%)  | 181 (37.3%)  |
| Other*                                            |                                                                | 1048 (15.7%) | 703 (67.1%)  | 345 (32.9%)  |
| <b>Study design with respect to primary label</b> | Another indication than the originally approved indication     | 2561 (38.3%) | 1397 (54.5%) | 1164 (45.5%) |
|                                                   | Originally approved indication                                 | 3889 (58.2%) | 2666 (68.6%) | 1223 (31.4%) |
|                                                   | Both the originally approved indication and another indication | 229 (3.4%)   | 113 (49.3%)  | 116 (50.7%)  |
| <b>Study type</b>                                 | Observational                                                  | 707 (10.6%)  | 468 (66.2%)  | 239 (33.8%)  |
|                                                   | Interventional                                                 | 5972 (89.4%) | 3708 (62.1%) | 2264 (37.9%) |

|                      |                |              |              |              |
|----------------------|----------------|--------------|--------------|--------------|
| <b>Randomization</b> | Missing data   | 2452         |              |              |
|                      | Yes            | 3067 (72.6%) | 1979 (64.5%) | 1088 (35.5%) |
|                      | No             | 1160 (27.4%) | 769 (66.3%)  | 391 (33.7%)  |
| <b>Study phase</b>   | 0              | 34 (0.6%)    | 13 (38.2%)   | 21 (61.8%)   |
|                      | I              | 933 (16.6%)  | 651 (69.8%)  | 282 (30.2%)  |
|                      | I/II           | 423 (7.5%)   | 245 (58.0%)  | 178 (42.0%)  |
|                      | II             | 1837 (32.6%) | 1047 (57.0%) | 790 (43.0%)  |
|                      | II/III         | 109 (1.9%)   | 52 (47.7%)   | 57 (52.3%)   |
|                      | III            | 1246 (22.1%) | 1018 (81.7%) | 228 (18.3%)  |
|                      | IV             | 1045 (18.6%) | 596 (57.0%)  | 449 (43.0%)  |
| <b>Centers</b>       | Missing data   | 503          | 428          | 75           |
|                      | Min/max        | 1/1616       | 1/1616       | 1/922        |
|                      | Median [Q1-Q3] | 2 [1-12]     | 4 [1-23]     | 1 [1-2]      |
|                      | Mean (SD)      | 19.9 (62.1)  | 26.4 (70.5)  | 9.8 (44.7)   |
| <b>Countries</b>     | Min/max        | 1/46         | 1/46         | 1/15         |
|                      | Median [Q1-Q3] | 1 [1-1]      | 1 [1-2]      | 1 [1-1]      |
|                      | Mean (SD)      | 2.6 (4.7)    | 3.6 (5.8)    | 1.1 (0.7)    |

1  
2  
3  
4  
5  
6  
7  
8  
9  
10  
11  
12  
13  
14  
15  
16  
17  
18  
19  
20  
21  
22  
23  
24  
25  
26  
27  
28  
29  
30  
31  
32  
33  
34  
35  
36  
37  
38  
39  
40  
41  
42  
43  
44  
45  
46  
47  
48  
49

|                                               |                         |               |               |                |
|-----------------------------------------------|-------------------------|---------------|---------------|----------------|
| <b>Planned enrollment</b>                     | Min/max                 | 1/904585      | 1/904585      | 1/61050        |
|                                               | Median [Q1-Q3]          | 60 [28-183]   | 72 [30-248]   | 48 [24-100]    |
|                                               | Mean (SD)               | 649.6 (12812) | 943.8 (16167) | 158.9 (1274.7) |
| <b>Status at the time of data exportation</b> | Not yet recruiting      | 319 (4.8%)    | 136 (42.6%)   | 183 (57.4%)    |
|                                               | Recruiting              | 1895 (28.4%)  | 886 (46.8%)   | 1009 (53.2%)   |
|                                               | Active, not recruiting  | 1013 (15.2%)  | 627 (61.9%)   | 386 (38.1%)    |
|                                               | Enrolling by invitation | 64 (1.0%)     | 42 (65.6%)    | 22 (34.4%)     |
|                                               | Completed               | 2901 (43.4%)  | 2147 (74.0%)  | 754 (26.0%)    |
|                                               | Terminated              | 487 (7.3%)    | 338 (69.4%)   | 149 (30.6%)    |

NIH, US National Institutes of Health

\*includes cardiovascular system, dermatological, genitourinary system and sex hormones, musculoskeletal system, sensory organs, systemic hormonal preparations, excluding sex hormones, and other



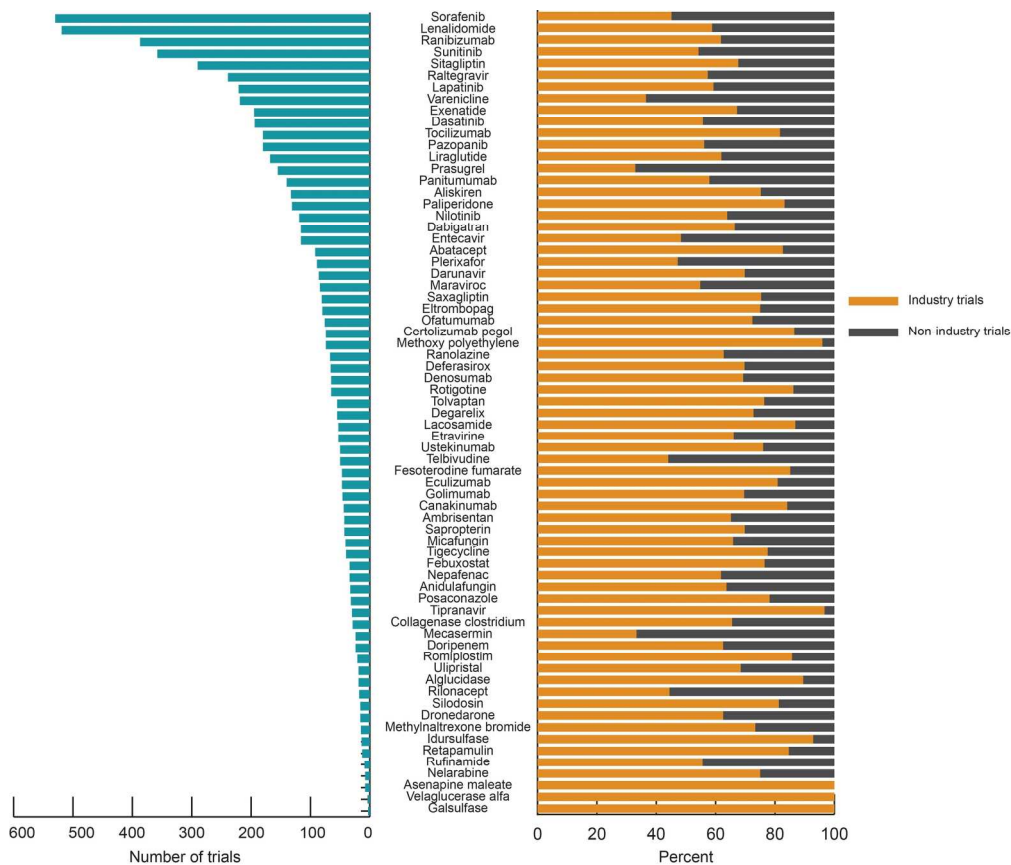

Figure 1

179x153mm (300 x 300 DPI)

1  
2  
3  
4  
5  
6  
7  
8  
9  
10  
11  
12  
13  
14  
15  
16  
17  
18  
19  
20  
21  
22  
23  
24  
25  
26  
27  
28  
29  
30  
31  
32  
33  
34  
35  
36  
37  
38  
39  
40  
41  
42  
43  
44  
45  
46  
47  
48  
49  
50  
51  
52  
53  
54  
55  
56  
57  
58  
59  
60

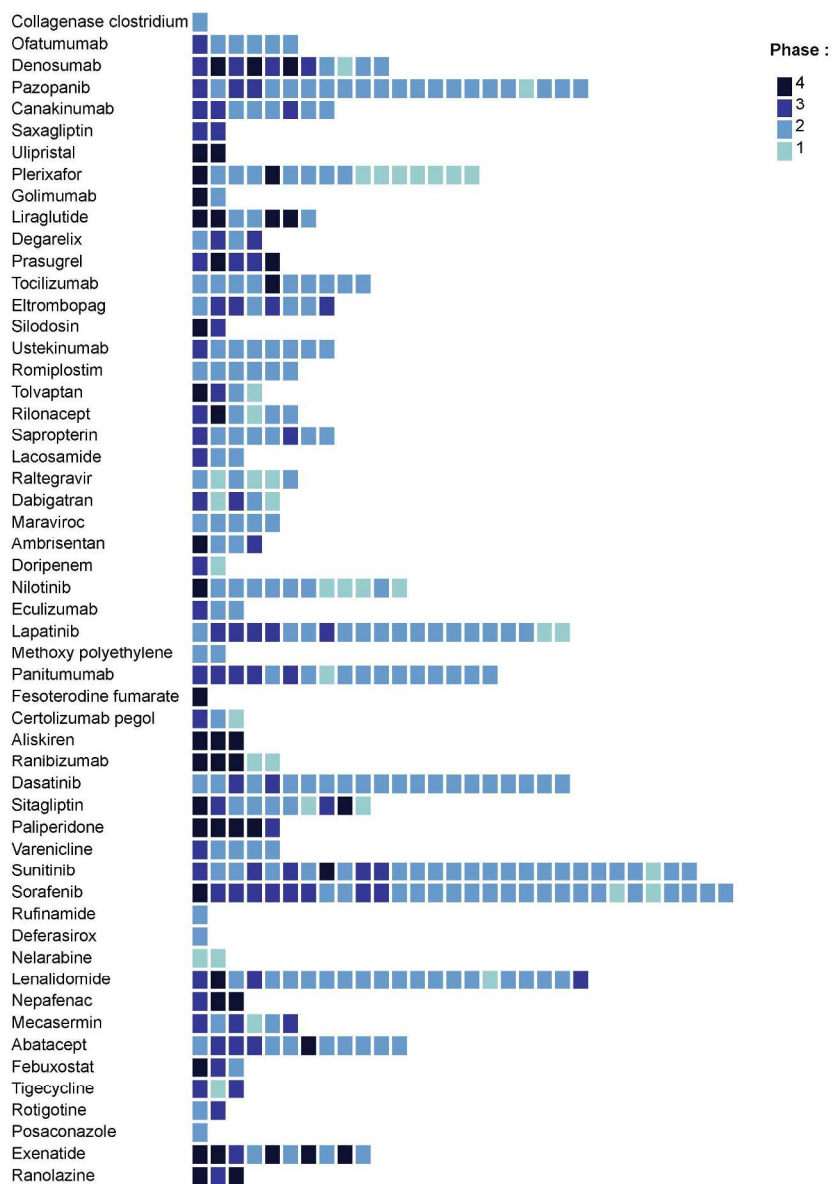

Figure 2

215x279mm (300 x 300 DPI)

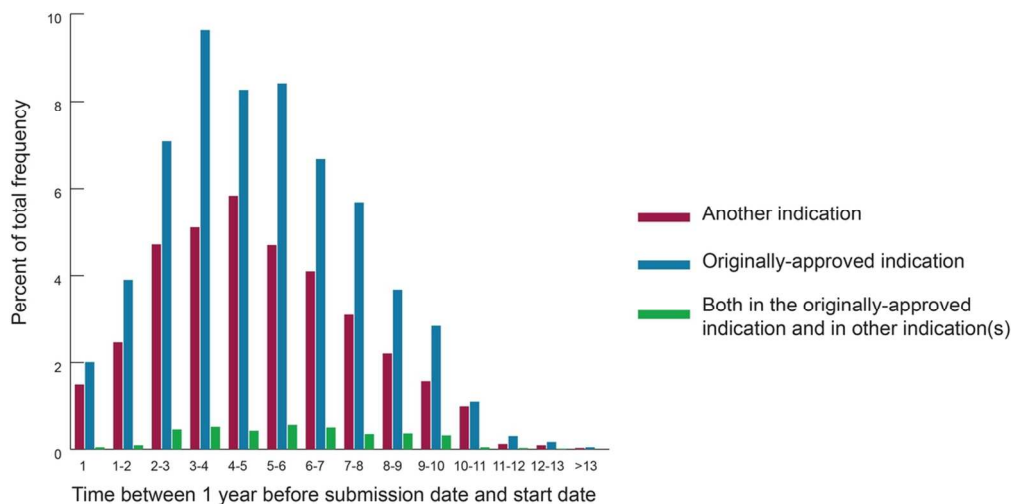

Figure 3

105x51mm (300 x 300 DPI)

For review only

1  
2  
3  
4  
5  
6  
7  
8  
9  
10  
11  
12  
13  
14  
15  
16  
17  
18  
19  
20  
21  
22  
23  
24  
25  
26  
27  
28  
29  
30  
31  
32  
33  
34  
35  
36  
37  
38  
39  
40  
41  
42  
43  
44  
45  
46  
47  
48  
49  
50  
51  
52  
53  
54  
55  
56  
57  
58  
59  
60

Supplemental Material 1. Sample construction of relevant post-marketing trials related to all 69 novel drugs both approved by the FDA and the EMA between 2005 and 2010, after exclusion of everolimus and temsirolimus

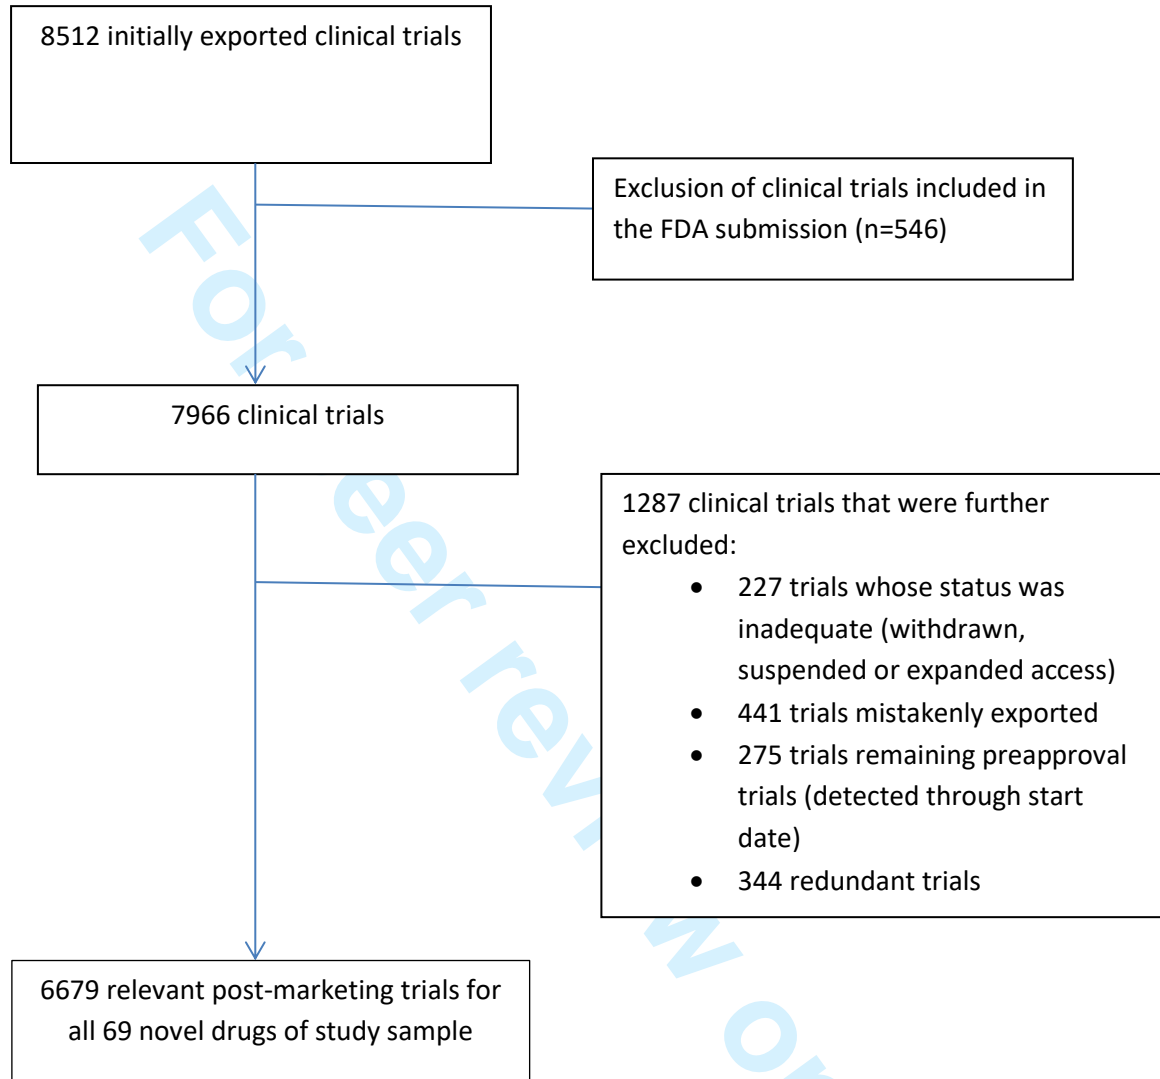

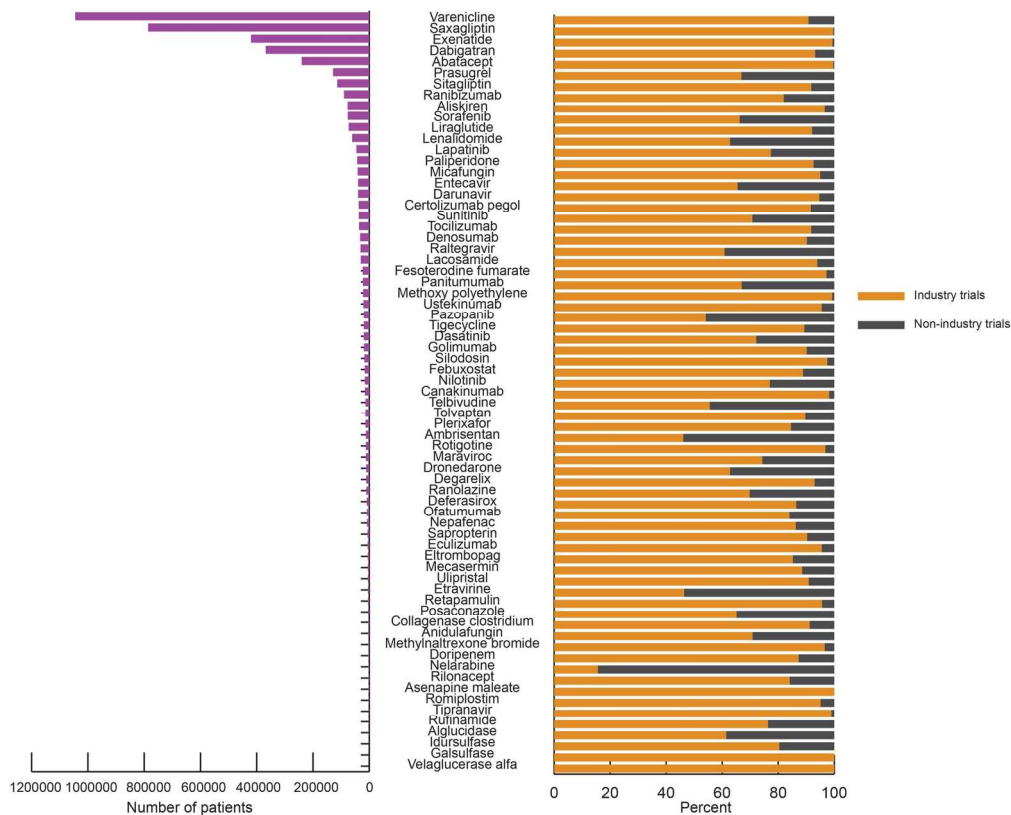

165x133mm (300 x 300 DPI)

For peer review only



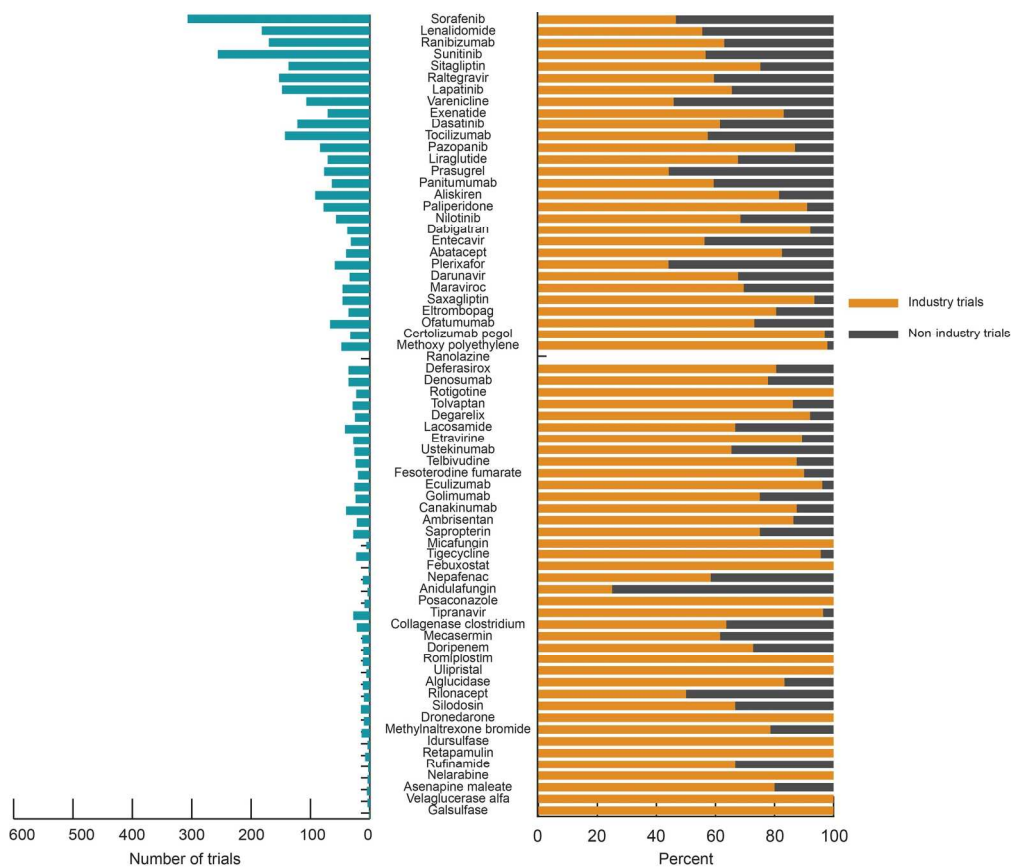

179x153mm (300 x 300 DPI)

1  
2  
3  
4  
5  
6  
7  
8  
9  
10  
11  
12  
13  
14  
15  
16  
17  
18  
19  
20  
21  
22  
23  
24  
25  
26  
27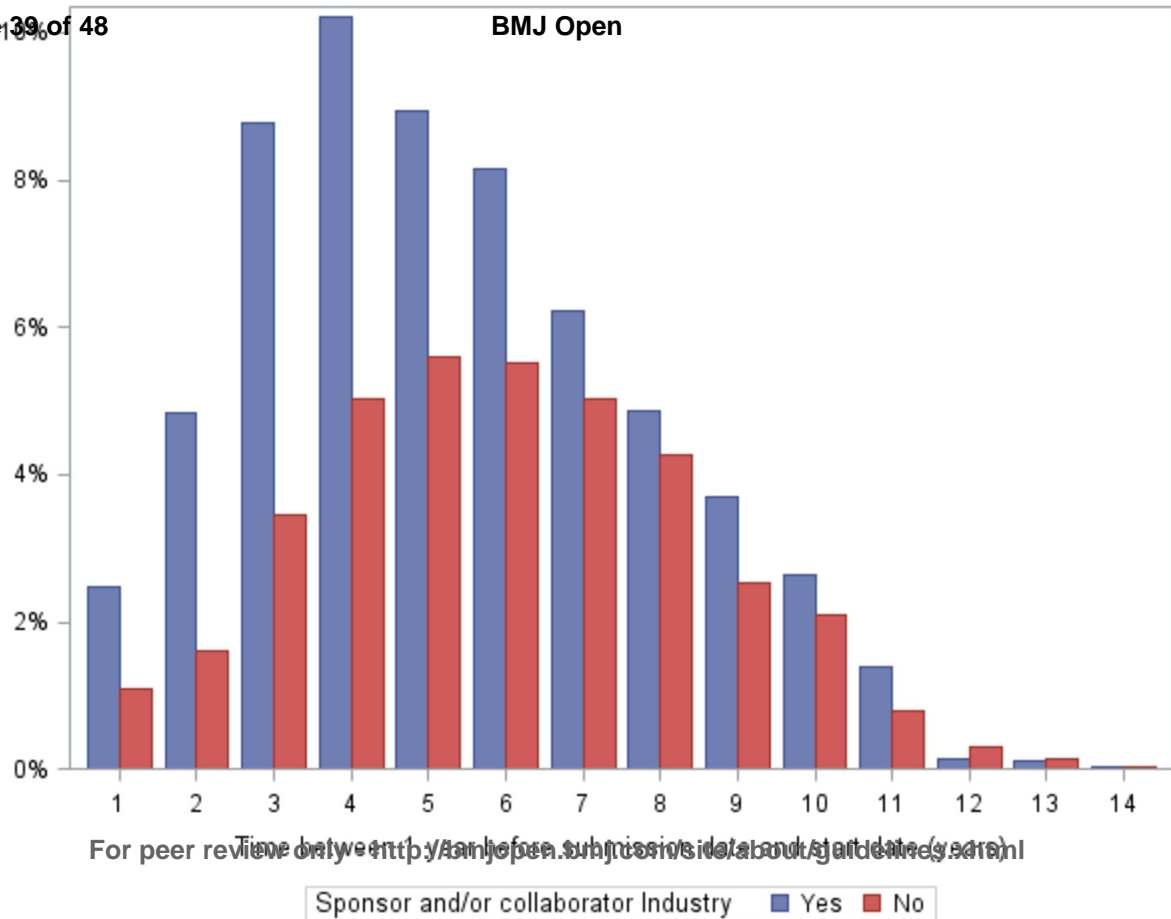



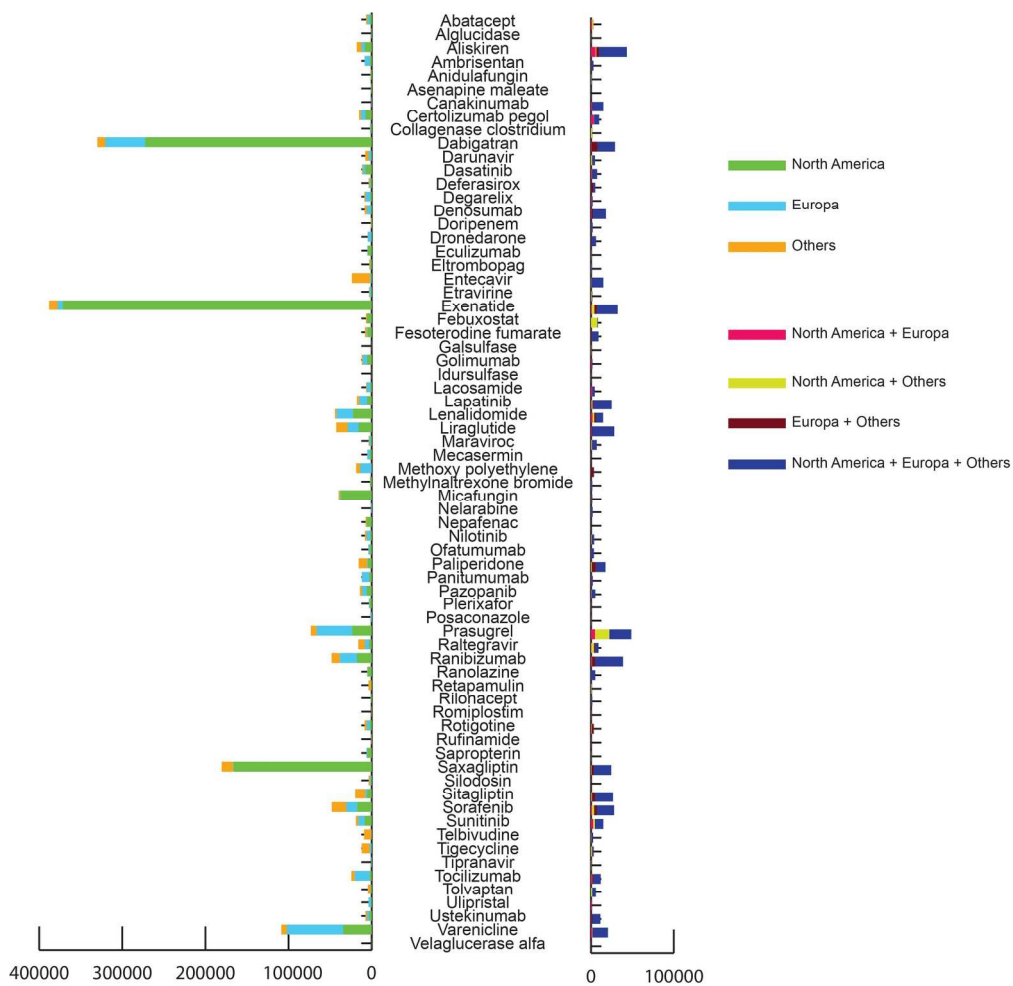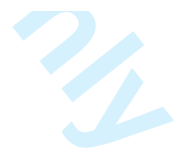

Supplemental file S2 bis: Total number of patients to be included in post-marketing studies for each drug

| Drug                  | Total number of patients to be included in post-marketing studies | Percentage of industry funders | Percentage of non-industry funders |
|-----------------------|-------------------------------------------------------------------|--------------------------------|------------------------------------|
| Varenicline           | 1045002                                                           | 90.8                           | 9.2                                |
| Saxagliptin           | 785853                                                            | 99.6                           | 0.4                                |
| Exenatide             | 420256                                                            | 99.3                           | 0.7                                |
| Dabigatran            | 368063                                                            | 93.1                           | 6.9                                |
| Abatacept             | 240227                                                            | 99.6                           | 0.4                                |
| Prasugrel             | 128744                                                            | 66.9                           | 33.1                               |
| Sitagliptin           | 113824                                                            | 91.8                           | 8.2                                |
| Ranibizumab           | 89765                                                             | 81.9                           | 18.1                               |
| Aliskiren             | 76864                                                             | 96.6                           | 3.4                                |
| Sorafenib             | 76434                                                             | 66.2                           | 33.8                               |
| Liraglutide           | 73106                                                             | 92.0                           | 8.0                                |
| Lenalidomide          | 60805                                                             | 62.8                           | 37.2                               |
| Lapatinib             | 45881                                                             | 77.4                           | 22.6                               |
| Paliperidone          | 43024                                                             | 92.6                           | 7.4                                |
| Micafungin            | 41363                                                             | 95.0                           | 5.0                                |
| Entecavir             | 39787                                                             | 65.5                           | 34.5                               |
| Darunavir             | 39773                                                             | 94.7                           | 5.3                                |
| Certolizumab pegol    | 37523                                                             | 91.6                           | 8.4                                |
| Sunitinib             | 37320                                                             | 70.7                           | 29.3                               |
| Tocilizumab           | 36262                                                             | 91.8                           | 8.2                                |
| Denosumab             | 32688                                                             | 90.2                           | 9.8                                |
| Raltegravir           | 31285                                                             | 60.8                           | 39.2                               |
| Lacosamide            | 30236                                                             | 93.9                           | 6.1                                |
| Fesoterodine fumarate | 23699                                                             | 97.2                           | 2.8                                |
| Panitumumab           | 22585                                                             | 66.9                           | 33.1                               |
| Methoxy polyethylene  | 22102                                                             | 99.2                           | 0.8                                |
| Ustekinumab           | 20873                                                             | 95.5                           | 4.5                                |
| Pazopanib             | 19332                                                             | 54.1                           | 45.9                               |
| Tigecycline           | 19322                                                             | 89.3                           | 10.7                               |
| Dasatinib             | 19320                                                             | 72.2                           | 27.8                               |
| Golimumab             | 18801                                                             | 90.1                           | 9.9                                |
| Silodosin             | 17591                                                             | 97.5                           | 2.5                                |
| Febuxostat            | 16330                                                             | 88.8                           | 11.2                               |
| Nilotinib             | 15657                                                             | 77.0                           | 23.0                               |
| Canakinumab           | 15418                                                             | 98.2                           | 1.8                                |
| Telbivudine           | 13590                                                             | 55.6                           | 44.4                               |
| Tolvaptan             | 13552                                                             | 89.7                           | 10.3                               |
| Plerixafor            | 13450                                                             | 84.6                           | 15.4                               |
| Ambrisentan           | 12300                                                             | 46.1                           | 53.9                               |

| Drug                     | Total number of patients to be included in post-marketing studies | Percentage of industry funders | Percentage of non-industry funders |
|--------------------------|-------------------------------------------------------------------|--------------------------------|------------------------------------|
| Rotigotine               | 12258                                                             | 96.8                           | 3.2                                |
| Maraviroc                | 11957                                                             | 74.3                           | 25.7                               |
| Dronedarone              | 10947                                                             | 62.7                           | 37.3                               |
| Degarelix                | 10811                                                             | 93.0                           | 7.0                                |
| Ranolazine               | 10614                                                             | 69.8                           | 30.2                               |
| Deferasirox              | 8812                                                              | 86.4                           | 13.6                               |
| Ofatumumab               | 7988                                                              | 84.0                           | 16.0                               |
| Nepafenac                | 7627                                                              | 86.2                           | 13.8                               |
| Sapropterin              | 6328                                                              | 90.3                           | 9.7                                |
| Eculizumab               | 6065                                                              | 95.5                           | 4.5                                |
| Eltrombopag              | 5590                                                              | 85.2                           | 14.8                               |
| Mecasermin               | 5291                                                              | 88.5                           | 11.5                               |
| Ulipristal               | 4932                                                              | 90.9                           | 9.1                                |
| Etravirine               | 4881                                                              | 46.4                           | 53.6                               |
| Retapamulin              | 4819                                                              | 95.6                           | 4.4                                |
| Posaconazole             | 4391                                                              | 65.1                           | 34.9                               |
| Collagenase clostridium  | 3897                                                              | 91.2                           | 8.8                                |
| Anidulafungin            | 3819                                                              | 70.8                           | 29.2                               |
| Methylnaltrexone bromide | 3581                                                              | 96.6                           | 3.4                                |
| Doripenem                | 3204                                                              | 87.3                           | 12.7                               |
| Nelarabine               | 3104                                                              | 15.6                           | 84.4                               |
| Rilonacept               | 2790                                                              | 84.1                           | 15.9                               |
| Asenapine maleate        | 2179                                                              | 100.0                          | 0.0                                |
| Romiplostim              | 1627                                                              | 95.1                           | 4.9                                |
| Tipranavir               | 1401                                                              | 98.9                           | 1.1                                |
| Rufinamide               | 1174                                                              | 76.3                           | 23.7                               |
| Alglucidase              | 803                                                               | 61.4                           | 38.6                               |
| Idursulfase              | 408                                                               | 80.4                           | 19.6                               |
| Galsulfase               | 269                                                               | 100.0                          | 0.0                                |
| Velaglucerase alfa       | 67                                                                | 100.0                          | 0.0                                |

## Supplemental file S3 bis: Population in preapproval pivotal trials and post-marketing studies

| Drug                  | Population in preapproval pivotal trials | Population in post-marketing studies |                                |                                                                   | Total   |
|-----------------------|------------------------------------------|--------------------------------------|--------------------------------|-------------------------------------------------------------------|---------|
|                       |                                          | Another indication                   | Originally-approved indication | Both in originally approved indication and in other(s) indication |         |
| Dabigatran            | 18040                                    | 10896                                | 332151                         | 25016                                                             | 368063  |
| Prasugrel             | 13457                                    | 1960                                 | 126669                         | 115                                                               | 128744  |
| Denosumab             | 7808                                     | 15825                                | 16863                          | 0                                                                 | 32688   |
| Aliskiren             | 5663                                     | 20625                                | 56239                          | 0                                                                 | 76864   |
| Dronedarone           | 4604                                     | 20                                   | 10927                          | 0                                                                 | 10947   |
| Varenicline           | 4198                                     | 1847                                 | 1024229                        | 18926                                                             | 1045002 |
| Tocilizumab           | 4190                                     | 2201                                 | 34061                          | 0                                                                 | 36262   |
| Saxagliptin           | 4148                                     | 396                                  | 785457                         | 0                                                                 | 785853  |
| Febuxostat            | 4101                                     | 854                                  | 15476                          | 0                                                                 | 16330   |
| Liraglutide           | 3978                                     | 9509                                 | 62587                          | 1010                                                              | 73106   |
| Ulipristal            | 3754                                     | 4012                                 | 920                            | 0                                                                 | 4932    |
| Tigecycline           | 2758                                     | 1339                                 | 6291                           | 11692                                                             | 19322   |
| Methoxy polyethylene  | 2398                                     | 8                                    | 22094                          | 0                                                                 | 22102   |
| Golimumab             | 2297                                     | 1222                                 | 17579                          | 0                                                                 | 18801   |
| Asenapine maleate     | 2294                                     | 0                                    | 2179                           | 0                                                                 | 2179    |
| Sitagliptin           | 2220                                     | 2794                                 | 110745                         | 285                                                               | 113824  |
| Doripenem             | 2117                                     | 267                                  | 2937                           | 0                                                                 | 3204    |
| Ustekinumab           | 1996                                     | 3793                                 | 17080                          | 0                                                                 | 20873   |
| Fesoterodine fumarate | 1935                                     | 182                                  | 23517                          | 0                                                                 | 23699   |
| Entecavir             | 1814                                     | 0                                    | 39787                          | 0                                                                 | 39787   |
| Paliperidone          | 1665                                     | 2548                                 | 35755                          | 4721                                                              | 43024   |
| Micafungin            | 1643                                     | 1105                                 | 39983                          | 275                                                               | 41363   |
| Ranolazine            | 1593                                     | 2945                                 | 5773                           | 1896                                                              | 10614   |
| Exenatide             | 1446                                     | 2810                                 | 417301                         | 145                                                               | 420256  |
| Abatacept             | 1382                                     | 5622                                 | 234605                         | 0                                                                 | 240227  |
| Telbivudine           | 1367                                     | 0                                    | 13590                          | 0                                                                 | 13590   |
| Lacosamide            | 1308                                     | 1133                                 | 29103                          | 0                                                                 | 30236   |
| Etravirine            | 1203                                     | 0                                    | 4881                           | 0                                                                 | 4881    |
| Posaconazole          | 1202                                     | 1949                                 | 1282                           | 1160                                                              | 4391    |
| Rotigotine            | 1163                                     | 4067                                 | 7671                           | 520                                                               | 12258   |
| Tipranavir            | 1159                                     | 0                                    | 1365                           | 36                                                                | 1401    |
| Ranibizumab           | 1139                                     | 20541                                | 36906                          | 32318                                                             | 89765   |
| Rufinamide            | 1097                                     | 288                                  | 886                            | 0                                                                 | 1174    |
| Certolizumab pegol    | 1088                                     | 1200                                 | 33077                          | 3246                                                              | 37523   |
| Sildenafil            | 923                                      | 1339                                 | 16252                          | 0                                                                 | 17591   |
| Anidulafungin         | 857                                      | 792                                  | 2993                           | 34                                                                | 3819    |
| Sorafenib             | 769                                      | 54317                                | 18809                          | 3308                                                              | 76434   |
| Raltegravir           | 699                                      | 83                                   | 31202                          | 0                                                                 | 31285   |
| Nepafenac             | 688                                      | 815                                  | 6812                           | 0                                                                 | 7627    |
| Darunavir             | 637                                      | 0                                    | 39773                          | 0                                                                 | 39773   |

| Drug                     | Population in preapproval pivotal trials | Population in post-marketing studies |                                |                                                                   | Total |
|--------------------------|------------------------------------------|--------------------------------------|--------------------------------|-------------------------------------------------------------------|-------|
|                          |                                          | Another indication                   | Originally-approved indication | Both in originally approved indication and in other(s) indication |       |
| Plerixafor               | 623                                      | 1467                                 | 11644                          | 339                                                               | 13450 |
| Degarelix                | 610                                      | 791                                  | 10020                          | 0                                                                 | 10811 |
| Deferasirox              | 586                                      | 153                                  | 8609                           | 50                                                                | 8812  |
| Dasatinib                | 565                                      | 9267                                 | 9090                           | 963                                                               | 19320 |
| Sunitinib                | 481                                      | 16462                                | 18362                          | 2496                                                              | 37320 |
| Panitumumab              | 461                                      | 5197                                 | 16874                          | 514                                                               | 22585 |
| Maraviroc                | 448                                      | 560                                  | 11397                          | 0                                                                 | 11957 |
| Pazopanib                | 435                                      | 10363                                | 8060                           | 909                                                               | 19332 |
| Tolvaptan                | 418                                      | 12221                                | 356                            | 975                                                               | 13552 |
| Ambrisentan              | 393                                      | 715                                  | 11585                          | 0                                                                 | 12300 |
| Collagenase clostridium  | 374                                      | 3897                                 | 0                              | 0                                                                 | 3897  |
| Lapatinib                | 324                                      | 7678                                 | 37714                          | 489                                                               | 45881 |
| Methylnaltrexone bromide | 321                                      | 1359                                 | 2222                           | 0                                                                 | 3581  |
| Eltrombopag              | 232                                      | 2957                                 | 2533                           | 100                                                               | 5590  |
| Retapamulin              | 210                                      | 267                                  | 4417                           | 135                                                               | 4819  |
| Nilotinib                | 196                                      | 2431                                 | 8531                           | 4695                                                              | 15657 |
| Lenalidomide             | 193                                      | 19105                                | 39873                          | 1827                                                              | 60805 |
| Nelarabine               | 190                                      | 35                                   | 3069                           | 0                                                                 | 3104  |
| Ofatumumab               | 154                                      | 3076                                 | 2595                           | 2317                                                              | 7988  |
| Romiplostim              | 125                                      | 543                                  | 1084                           | 0                                                                 | 1627  |
| Idursulfase              | 96                                       | 0                                    | 408                            | 0                                                                 | 408   |
| Sapropterin              | 88                                       | 1133                                 | 5195                           | 0                                                                 | 6328  |
| Eculizumab               | 87                                       | 3861                                 | 2204                           | 0                                                                 | 6065  |
| Mecasermin               | 70                                       | 623                                  | 4668                           | 0                                                                 | 5291  |
| Riloncept                | 47                                       | 2765                                 | 25                             | 0                                                                 | 2790  |
| Galsulfase               | 39                                       | 0                                    | 269                            | 0                                                                 | 269   |
| Canakinumab              | 31                                       | 15157                                | 261                            | 0                                                                 | 15418 |
| Velaglucerase alfa       | 25                                       | 0                                    | 67                             | 0                                                                 | 67    |
| Alglucidase              | 18                                       | 0                                    | 803                            | 0                                                                 | 803   |

Supplemental file S6 bis: Location of post-marketing studies (sample size by location)

|                         | Location      |        |        |                        |                        |                 |                                 |
|-------------------------|---------------|--------|--------|------------------------|------------------------|-----------------|---------------------------------|
|                         | North America | Europa | Others | North America + Europa | North America + Others | Europa + Others | North America + Europa + Others |
| Abatacept               | 2267          | 2801   | 1575   | 1255                   | 1715                   | 0               | 9390                            |
| Alglucidase             | 633           | 5      | 0      | 83                     | 22                     | 20              | 40                              |
| Aliskiren               | 8269          | 3870   | 5760   | 5467                   | 975                    | 3097            | 33667                           |
| Ambrisentan             | 2128          | 6116   | 196    | 64                     | 524                    | 0               | 2330                            |
| Anidulafungin           | 1115          | 225    | 214    | 0                      | 282                    | 21              | 776                             |
| Asenapine maleate       | 950           | 0      | 0      | 0                      | 0                      |                 | 0                               |
| Canakinumab             | 164           | 320    | 34     | 1037                   | 0                      | 274             | 13569                           |
| Certolizumab pegol      | 7278          | 5383   | 2401   | 3225                   | 271                    | 0               | 6265                            |
| Collagenase clostridium | 1402          | 541    | 79     | 0                      | 1286                   | 0               | 400                             |
| Dabigatran              | 272415        | 47930  | 9639   | 636                    | 0                      | 7096            | 21220                           |
| Darunavir               | 755           | 2880   | 4076   | 12                     | 1213                   | 576             | 2940                            |
| Dasatinib               | 7476          | 2941   | 1139   | 768                    | 195                    | 484             | 5866                            |
| Deferasirox             | 1473          | 1023   | 1148   | 0                      | 0                      | 2506            | 2575                            |
| Degarelix               | 1613          | 5646   | 1522   | 783                    | 0                      | 0               | 1147                            |
| Denosumab               | 1168          | 4547   | 2692   | 427                    | 0                      | 1439            | 16134                           |
| Doripenem               | 82            | 195    | 818    | 52                     | 0                      | 0               | 1911                            |
| Dronedarone             | 480           | 4143   | 279    | 0                      | 0                      | 556             | 5436                            |
| Eculizumab              | 4683          | 447    | 52     | 60                     | 92                     | 80              | 463                             |
| Eltrombopag             | 1486          | 458    | 992    | 82                     | 0                      | 100             | 1059                            |
| Entecavir               | 807           | 1096   | 21848  | 4                      | 200                    | 184             | 14460                           |
| Etravirine              | 857           | 1730   | 570    | 30                     | 671                    | 279             | 536                             |
| Exenatide               | 371779        | 5876   | 10283  | 736                    | 3323                   | 2963            | 25151                           |
| Febuxostat              | 5473          | 0      | 1424   | 0                      | 7500                   | 0               | 744                             |
| Fesoterodine fumarate   | 4555          | 1231   | 2245   | 0                      | 0                      | 794             | 8210                            |

|                          | Location      |        |        |                        |                        |                 |                                 |
|--------------------------|---------------|--------|--------|------------------------|------------------------|-----------------|---------------------------------|
|                          | North America | Europa | Others | North America + Europa | North America + Others | Europa + Others | North America + Europa + Others |
| Galsulfase               | 10            | 0      | 0      | 0                      | 200                    | 0               | 59                              |
| Golimumab                | 5459          | 5031   | 1361   | 706                    | 11                     | 120             | 811                             |
| Idursulfase              | 0             | 0      | 81     | 79                     | 0                      | 108             | 118                             |
| Lacosamide               | 1597          | 4167   | 946    | 1210                   | 0                      | 0               | 3281                            |
| Lapatinib                | 5446          | 9359   | 2989   | 502                    | 1106                   | 876             | 22398                           |
| Lenalidomide             | 22422         | 19825  | 1874   | 1804                   | 1916                   | 1972            | 8846                            |
| Liraglutide              | 15787         | 12960  | 13865  | 717                    | 0                      | 415             | 26892                           |
| Maraviroc                | 1268          | 1849   | 561    | 129                    | 876                    | 186             | 5698                            |
| Mecasermin               | 2073          | 3198   | 0      | 0                      | 0                      | 0               | 0                               |
| Methoxy polyethylene     | 340           | 13375  | 4841   | 0                      | 0                      | 2828            | 718                             |
| Methylnaltrexone bromide | 1968          | 31     | 0      | 0                      | 0                      | 0               | 1462                            |
| Micafungin               | 37521         | 664    | 1518   | 0                      | 84                     | 619             | 836                             |
| Nelarabine               | 95            | 720    | 13     | 0                      | 36                     | 40              | 1900                            |
| Nepafenac                | 5927          | 227    | 1021   | 0                      | 0                      | 0               | 0                               |
| Nilotinib                | 1660          | 4393   | 1964   | 175                    | 512                    | 218             | 2882                            |
| Ofatumumab               | 2401          | 1549   | 20     | 60                     | 14                     | 122             | 3294                            |
| Paliperidone             | 4400          | 1064   | 10125  | 0                      | 838                    | 4753            | 11816                           |
| Panitumumab              | 2888          | 8858   | 164    | 375                    | 0                      | 0               | 1700                            |
| Pazopanib                | 5947          | 5436   | 2684   | 374                    | 207                    | 102             | 4518                            |
| Plerixafor               | 2374          | 850    | 164    | 0                      | 61                     | 46              | 0                               |
| Posaconazole             | 154           | 1370   | 126    | 96                     | 0                      | 0               | 600                             |
| Prasugrel                | 23597         | 42550  | 7015   | 4760                   | 17372                  | 0               | 26550                           |
| Raltegravir              | 3106          | 4949   | 8048   | 366                    | 3156                   | 1173            | 4308                            |
| Ranibizumab              | 17679         | 20576  | 9883   | 694                    | 232                    | 3832            | 33851                           |
| Ranolazine               | 4524          | 551    | 310    | 0                      | 0                      | 0               | 5102                            |

|                    | Location      |        |        |                        |                        |                 |                                 |
|--------------------|---------------|--------|--------|------------------------|------------------------|-----------------|---------------------------------|
|                    | North America | Europa | Others | North America + Europa | North America + Others | Europa + Others | North America + Europa + Others |
| Retapamulin        | 784           | 0      | 3000   | 0                      | 508                    | 465             | 60                              |
| Rilonacept         | 1242          | 30     | 0      | 0                      | 0                      | 244             | 1274                            |
| Romiplostim        | 280           | 119    | 76     | 63                     | 62                     | 0               | 175                             |
| Rotigotine         | 2229          | 3696   | 2553   | 220                    | 601                    | 2197            | 371                             |
| Rufinamide         | 230           | 278    | 366    | 75                     | 0                      | 0               | 0                               |
| Sapropterin        | 5120          | 1018   | 0      | 0                      | 190                    | 0               | 0                               |
| Saxagliptin        | 166072        | 594    | 13757  | 0                      | 501                    | 2670            | 21205                           |
| Silodosin          | 885           | 1196   | 1559   | 0                      | 0                      | 0               | 0                               |
| Sitagliptin        | 5577          | 2079   | 12049  | 164                    | 804                    | 3770            | 21728                           |
| Sorafenib          | 17405         | 13223  | 17312  | 973                    | 2681                   | 3230            | 20954                           |
| Sunitinib          | 8448          | 7676   | 2806   | 2557                   | 2006                   | 167             | 10074                           |
| Telbivudine        | 159           | 132    | 8934   | 0                      | 308                    | 367             | 1790                            |
| Tigecycline        | 473           | 1987   | 9632   | 0                      | 1175                   | 473             | 1588                            |
| Tipranavir         | 71            | 504    | 0      | 0                      | 246                    | 0               | 84                              |
| Tocilizumab        | 2511          | 17868  | 4033   | 1054                   | 228                    | 1270            | 9070                            |
| Tolvaptan          | 1227          | 304    | 3131   | 0                      | 1300                   | 0               | 4500                            |
| Ulipristal         | 855           | 2845   | 51     | 579                    | 60                     | 542             | 0                               |
| Ustekinumab        | 2823          | 2649   | 2004   | 166                    | 0                      | 1290            | 9859                            |
| Varenicline        | 34574         | 67592  | 6523   | 1307                   | 360                    | 0               | 18706                           |
| Velaglycerase alfa | 0             | 50     | 17     | 0                      | 0                      | 0               | 0                               |



eTable. Planned enrollment of post-marketing trials by industry and non-industry funding for indications targeted in trials.

| Indication                                                            | Industry funding |                                                             | Non-industry funding |                                                            |
|-----------------------------------------------------------------------|------------------|-------------------------------------------------------------|----------------------|------------------------------------------------------------|
|                                                                       | No. of trials    | Planned enrollment                                          | No. of trials        | Planned enrollment                                         |
| <b>Originally approved indication</b>                                 | 2742             | Median [Q1-Q3]: 100 [33-323]<br>Mean (SD): 1322.0 (19921.8) | 1251                 | Median [Q1-Q3]: 60 [29.5-150]<br>Mean (SD): 230.9 (1771.2) |
| <b>Other indication(s)</b>                                            | 1310             | Median [Q1-Q3]: 45 [24-128]<br>Mean (SD): 167.7 (SD: 544.1) | 1131                 | Median [Q1-Q3]: 40 [21-70]<br>Mean (SD): 72.9 (148.0)      |
| <b>Both the originally approved indication and another indication</b> | 124              | Median [Q1-Q3]: 60 [30-224]<br>Mean (SD): 765.2 (2961.8)    | 121                  | Median [Q1-Q3]: 50 [30-120]<br>Mean (SD): 218.1 (934.9)    |

Data were missing for 9 industry-funded trials and 5 other trials.

# BMJ Open

## Post-marketing studies for novel drugs approved by both the FDA and EMA between 2005 and 2010: a cross-sectional study

|                                 |                                                                                                                                                                                                                                                                                                                                                                                                                                                                                                                                                                                                             |
|---------------------------------|-------------------------------------------------------------------------------------------------------------------------------------------------------------------------------------------------------------------------------------------------------------------------------------------------------------------------------------------------------------------------------------------------------------------------------------------------------------------------------------------------------------------------------------------------------------------------------------------------------------|
| Journal:                        | <i>BMJ Open</i>                                                                                                                                                                                                                                                                                                                                                                                                                                                                                                                                                                                             |
| Manuscript ID                   | bmjopen-2017-018587.R2                                                                                                                                                                                                                                                                                                                                                                                                                                                                                                                                                                                      |
| Article Type:                   | Research                                                                                                                                                                                                                                                                                                                                                                                                                                                                                                                                                                                                    |
| Date Submitted by the Author:   | 03-Nov-2017                                                                                                                                                                                                                                                                                                                                                                                                                                                                                                                                                                                                 |
| Complete List of Authors:       | Zeitoun, Jean-David; Hôtel Dieu Hospital, Epidémiologie Clinique; Saint-Antoine Hospital, Gastroenterology and Nutrition<br>Ross, Joseph; Yale University School of Medicine, Internal Medicine<br>Atal, Ignacio; Hotel Dieu Hospital, Epidémiologie Clinique<br>Vivot, Alexandre; Hotel Dieu Hospital, Epidémiologie Clinique<br>Downing, Nicholas; Brigham and Women's Hospital and Harvard Medical School, Medicine<br>Baron, Gabriel; INSERM U1153; Hôtel Dieu Hospital, Centre d'Epidémiologie Clinique<br>Ravaud, Philippe; Université Paris Descartes, Centre d'épidémiologie clinique; INSERM U1153 |
| <b>Primary Subject Heading</b>: | Pharmacology and therapeutics                                                                                                                                                                                                                                                                                                                                                                                                                                                                                                                                                                               |
| Secondary Subject Heading:      | Research methods, Public health                                                                                                                                                                                                                                                                                                                                                                                                                                                                                                                                                                             |
| Keywords:                       | THERAPEUTICS, STATISTICS & RESEARCH METHODS, EPIDEMIOLOGY                                                                                                                                                                                                                                                                                                                                                                                                                                                                                                                                                   |
|                                 |                                                                                                                                                                                                                                                                                                                                                                                                                                                                                                                                                                                                             |

SCHOLARONE™  
Manuscripts

1  
2  
3 **Post-marketing studies for novel drugs approved by both the FDA and EMA between**  
4  
5 **2005 and 2010: a cross-sectional study**  
6  
7

8 Jean-David Zeitoun, MD, MHPM, PhD candidate <sup>1,2,3</sup>, Joseph S. Ross, MD, MHS <sup>4,5,6,7</sup>,  
9  
10 Ignacio Atal, MSc <sup>1,8</sup>, Alexandre Vivot, MD, MPH, <sup>1,8</sup>, Nicholas S. Downing, MD <sup>9</sup>, Gabriel  
11  
12 Baron, PhD <sup>1,8,10</sup>, Philippe Ravaud, MD, PhD <sup>1,8,10,11</sup>  
13

- 14  
15 
- 16 1. Centre d'Épidémiologie Clinique, Hôpital Hôtel Dieu, Assistance Publique-Hôpitaux  
17 de Paris, Paris, France
  - 18 2. Gastroenterology and Nutrition, Hôpital Saint-Antoine, Assistance Publiques-  
19 Hôpitaux de Paris, Paris, France
  - 20 3. Proctology, Groupe Hospitalier Diaconesses-Croix Saint-Simon, Paris, France
  - 21 4. Department of Internal Medicine, Robert Wood Johnson Foundation Clinical Scholars  
22 Program, Yale School of Medicine, New Haven, Connecticut, USA
  - 23 5. Department of Internal Medicine, Section of General Internal Medicine, Yale School  
24 of Medicine, New Haven, Connecticut, USA
  - 25 6. Department of Health Policy and Management, Yale School of Public Health, New  
26 Haven, Connecticut, USA
  - 27 7. Center for Outcomes Research and Evaluation, Yale-New Haven Hospital, New  
28 Haven, Connecticut, USA
  - 29 8. INSERM UMR 1153, Centre de Recherche Épidémiologie et Statistique Paris  
30 Sorbonne Cité (CRESS), METHODS Team, Paris, France
  - 31 9. Department of Medicine, Brigham and Women's Hospital and Harvard Medical  
32 School, Boston, Massachusetts
  - 33 10. Université Paris Descartes, Sorbonne Paris Cité, Paris, France
  - 34 11. Department of Epidemiology, Columbia University Mailman School of Public Health,  
35 New York, New York, United States of America.
- 36  
37  
38  
39  
40  
41  
42  
43  
44  
45  
46  
47  
48  
49  
50  
51  
52  
53  
54  
55  
56  
57  
58  
59  
60

1  
2  
3 **Corresponding author:** Dr. Jean-David Zeitoun, MD, MHPM, PhD candidate, Centre  
4  
5 d'Epidémiologie Clinique, Hôpital Hôtel Dieu, Assistance Publique-Hôpitaux de Paris, Paris,  
6  
7 France. E-mail: [jdzeitoun@yahoo.fr](mailto:jdzeitoun@yahoo.fr)  
8

9 **Word count:** 3867

10  
11 **Abstract:** 279

12  
13 **References:** 29

14  
15 **Figures:** 3

16  
17  
18 **Tables:** 2  
19  
20  
21  
22  
23  
24  
25  
26  
27  
28  
29  
30  
31  
32  
33  
34  
35  
36  
37  
38  
39  
40  
41  
42  
43  
44  
45  
46  
47  
48  
49  
50  
51  
52  
53  
54  
55  
56  
57  
58  
59  
60

## ABSTRACT

**Objectives:** To characterize post-marketing studies for drugs that were newly approved by the US Food and Drug Administration (FDA) and the European Medicines Agency (EMA).

**Design and Setting:** Cross-sectional analysis of post-marketing studies registered in ClinicalTrials.gov until September 2014 for all novel drugs approved by both regulators between 2005 and 2010. Regulatory documents from both agencies were used.

**Primary and secondary outcome measures:** All identified post-marketing studies were classified according to planned enrolment, funding, status, and geographical location, and we determined whether studies studied the originally approved indication.

**Results:** Overall, 69 novel drugs approved between 2005 and 2010 were eligible for inclusion. A total of 6679 relevant post-marketing studies were identified; 5972 were interventional (89.4%). The median number of studies per drug was 55 (interquartile range [IQR]: 33-119) and median number of patients to be enrolled per study was 60 (IQR, 28-183). Industry was the primary sponsor of 2713 studies (40.6%) and was a primary or secondary sponsor in 4176 studies (62.5%). In all, 2901 studies (43.4%) were completed, 487 (7.3%) terminated, 1013 (15.2%) active yet not recruiting, 1895 (28.4%) recruiting, and 319 (4.8%) not yet recruiting. A total of 80% of studies were conducted in only one country and 84.4% took place in Europe and/or North America; 2441 (36.5%) studied another indication than the originally approved indication. Studies designed in the originally-approved indication were found to be more industry-sponsored than others 68.7% vs. 53.7%;  $p < 0.0001$ ).

**Conclusions:** Post-marketing pharmaceutical research was highly variable and predominantly located in North America and Europe. Post-marketing studies were frequently designed to study indications other than the originally approved one. Although some findings were reassuring, others question the lack of coordination of post-marketing research.

### Strengths and limitations of this study

This is the first study to systematically assess clinical studies performed after marketing approval by the two leading regulators, namely the US Food and Drug Administration (FDA) and the European Medicines Agency (EMA).

This approach allowed us to examine a substantial number of post-marketing studies over a long time period.

However and due to registration bias, we cannot exclude that some true post-marketing studies were missed and therefore unanalyzed.

**Funding:** This research received no specific grant from any funding agency in the public, commercial or not-for-profit sectors.

**Competing interests:** Dr. Zeitoun reports that he serves as an advisor for several consulting firms and communication companies linked with the pharmaceutical industry (Cepton, Oliver Wyman, Roland Berger, McCann Healthcare, Omnicom, Grey Healthcare, Saatchi and Saatchi Healthcare, Sudler & Hennessey, TBWA, inVentiv Health France, Havas). He also reports compensation for lectures given to manufacturer professional associations; collaboration with Mayoly-Spindler, Merck, Teva, Johnson & Johnson, and Menarini; unpaid consultancy for EY; conducting workshops funded by Amgen; and being invited to a French medical congress by AbbVie. Dr. Ross receives support through Yale University from Johnson and Johnson to develop methods of clinical trial data-sharing; from the Centers of Medicare and Medicaid Services (CMS) to develop and maintain performance measures that are used for public reporting; from Medtronic, Inc. and the US FDA to develop methods for

1  
2  
3  
4  
5  
6  
7  
8  
9  
10  
11  
12  
13  
14  
15  
16  
17  
18  
19  
20  
21  
22  
23  
24  
25  
26  
27  
28  
29  
30  
31  
32  
33  
34  
35  
36  
37  
38  
39  
40  
41  
42  
43  
44  
45  
46  
47  
48  
49  
50  
51  
52  
53  
54  
55  
56  
57  
58  
59  
60

post-market surveillance of medical devices; from the Blue Cross Blue Shield Association to better understand medical technology evaluation; and from the Laura and John Arnold Foundation to support the Collaboration on Research Integrity and Transparency (CRIT) at Yale.

For peer review only

## Introduction

The US Food and Drug Administration (FDA) and the European Medicines Agency (EMA) are the two largest and most influential drug regulators worldwide. They tend to maintain similar premarket regulatory standards, and drug manufacturers probably tend to submit the same evidence to both as part of the premarket application process, even though we lack comparative data. Drug evaluation continues after regulatory approval, in particular through post-authorization requirements and commitments. The US FDA can use several regulatory instruments and harness various sources for post-marketing evaluation of approved drugs. Among them are the FDA Adverse Reporting System and the Sentinel System. [1] The EMA also has a set of post-authorization measures, from direct request by its dedicated committee, to specific obligations for certain drugs, all aiming at retrieving data for post-marketing assessment.[2] Yet these post-marketing clinical studies required by regulators are limited in number and are not consistently completed. [3–5] This situation raises the question of whether other studies of these drugs after regulatory approval, including those conducted by industry and independent investigators, but not to fulfill regulatory requirements, should be considered part of ongoing, continuous evaluation efforts.

Post-marketing studies are designed with different intent than are premarket trials. Their designs are not systematically submitted to regulatory agencies before initiation because many post-marketing studies are conducted by independent investigators, and their conduct is less rigorously regulated. [6] Post-marketing studies seek to evaluate safety regarding rare events, to assess the real-life effectiveness of novel drugs and to measure their long-term effects. They also permit drug evaluation in different populations, other indications for the same disease, other diseases or with different delivery systems or dosage forms. Moreover, although premarket trials are nearly exclusively sponsored by the manufacturers, post-marketing studies can be funded by manufacturers but also academic or other types of non-



1  
2  
3 profit institutions. Some research also suggested that a substantial proportion of post-  
4  
5 marketing trials, even those with results eventually published in high-impact-factor journals,  
6  
7 were designed for marketing purposes rather than medical interest. [7,8]  
8  
9

10  
11 Nevertheless, post-marketing studies have considerable influence on all stakeholders,  
12  
13 in particular researchers, practitioners and regulators or decision makers, because they provide  
14  
15 cumulative evidence regarding marketed products. However, we lack an overall assessment of  
16  
17 post-marketing studies regarding novel drugs. Post-marketing research has been studied for  
18  
19 high-risk devices [9] or even for drugs, but with a focused approach: safety [10,11] or given  
20  
21 therapeutic areas. [12–15] Some of those studies produced reassuring results, yet others  
22  
23 showed inconsistencies, with gaps in knowledge regarding some issues.  
24  
25

26  
27 Our research objective was to provide a comprehensive description of post-marketing  
28  
29 studies registered in ClinicalTrials.gov, a publicly-accessible clinical trial registry maintained  
30  
31 by the US National Institutes of Health over almost a decade for a sample of drugs approved  
32  
33 by both the FDA and EMA from 2005 to 2010. We aimed to characterize the total number of  
34  
35 studies and patients studied, targeted indications, funding origin, geographical location of  
36  
37 studies and status (e.g., completed or ongoing). We also sought to examine differences  
38  
39 between the condition of the initial label and the specific clinical condition studied in the post-  
40  
41 marketing studies, to assess the influence of the sponsor on the targeted indication, and to  
42  
43 describe supplemental indications.  
44  
45  
46  
47  
48  
49  
50  
51  
52  
53  
54  
55  
56  
57  
58  
59  
60

## Methods

### *Data sources and study sample*

We identified all novel drugs approved between January 1, 2005 and December 31, 2010 by both the FDA and EMA through its Centralized Authorization Procedure. For the FDA, Drugs@FDA is a publicly accessible database listing relevant regulatory actions for all approved drugs. [16] For the EMA, information was accessible in the European Public Assessment Reports, which provide a summary of scientific review and list notable regulatory events for all drug submissions.[17] Generic drugs, reformulations, combination therapies and non-therapeutic agents such as radiographic dye were not included. This first search led to a sample of 71 novel drugs approved by both regulators between 2005 and 2010. Two drugs, everolimus and temsirolimus, were excluded because they were associated with an abnormally high number of post-marketing studies involving drug-eluting stents.

### *Drug and manufacturer characteristics*

The following data were retrieved for each drug: agent type (small molecule or biologic), dates of regulatory submissions for both the FDA and EMA, orphan status according to the FDA, orphan designation from the EMA, therapeutic class according to the Anatomical Therapeutic Chemical classification, [18] initial label from both regulators, degree of novelty (first-in-class, advance-in-class, addition-to-class) as previously described in a paper from FDA officials [19] and size of the marketing-authorization holder (i.e., manufacturer). This latter information was obtained by personal communication with EMA officials (Dr. Constantinos Ziogas, Small and Medium-sized Manufacturer Office, EMA), who classified manufacturers as large pharmaceutical companies, intermediated-size companies or small- and medium-size companies according to the European Union definition based on headcount and financial turnover or balance sheet total.

### *Preapproval FDA pivotal trial characteristics*

We obtained data for the expected length of treatment and number of patients from pivotal efficacy trials supporting FDA approvals that had been collected for a previous work. [20] In brief, acute treatment was defined as expected use < 1 month, intermediate treatment as expected use from 1 month to 2 years, and chronic treatment as expected use > 2 years.

### *Post-marketing studies*

On September 24, 2014, we extracted all studies that were registered at ClinicalTrials.gov for each drug of our sample, regardless of dates and other details. We then excluded studies with the following characteristics: included in the FDA regulatory submission (by a manual review of Drugs@FDA), with inadequate registered status (expanded-access studies, withdrawn studies, suspended studies), and mistakenly extracted (i.e., studies actually not assessing the drug of interest). For our main analysis, we decided that all studies whose starting date had preceded the first regulatory submission (to the FDA or EMA) by 1 year or less would be classified as post-marketing studies. However, we also performed most calculations with a slightly different set of studies, namely only those whose launch started after the first regulatory approval of any agency. Trials that pertained to more than one drug in our sample were manually reviewed so as to assign them to only one drug for the sake of further statistical analysis. Clinical judgment was applied to choose the “leading” drug in each study. When we could not determine the leading drug, we used the following rules. If the study was funded by a marketing-authorization holder of one of the drugs, this drug was considered the leading drug. Otherwise, if the study involved a drug that was assessed for another indication than the originally approved indication, this drug was considered the leading drug. Finally, when no leading drug could be determined, the drug for which the last regulatory approval had been granted was considered the drug tested and was classified as the leading drug.

1  
2  
3 For all remaining post-marketing studies, the following data were collected: condition  
4 studied, starting date, study sponsors (as a primary sponsor or a collaborator), status at the  
5 date of extraction (not yet recruiting, recruiting, active yet not recruiting, enrolling by  
6 invitation, completed, terminated), number and list of countries, number of centers, study  
7 phase, study type (observational or interventional), randomization, and planned enrollment. In  
8 addition, studies were classified as assessing the drug for its originally approved indication or  
9 not, depending on the initial label. When the initial label differed between the FDA and EMA,  
10 we accepted both labels as defining the originally approved indication. One of us (JDZ)  
11 performed this classification after careful review of each primary label. Indications were  
12 classified according to the Global Burden of Diseases classification. [21] Details of the  
13 classification of post-marketing studies are provided in the Appendix.

#### 24 25 26 27 *Supplemental indications*

28  
29 We also collected approvals of supplemental indications by the FDA during the study period  
30 (2005-2014) by manual review of Drugs@FDA. In the “Approval date(s) and History,  
31 Letters, Labels, Reviews” section, all events designated as “efficacy-new indication” or  
32 “efficacy” were reviewed and retained if deemed appropriate. Labeling revision (such as those  
33 related to a modified indication or an expanded patient population) and manufacturing change  
34 or addition were not included, nor were irrelevant supplemental indications. We also aimed to  
35 assess the average number of patients to be enrolled in post-marketing studies to gain  
36 approval of a supplemental indication. For this purpose, we took into account all patients from  
37 all post-marketing studies from the start of our sample through 1 year before the issuance of  
38 the supplemental indication by the FDA.

#### 39 40 41 42 43 44 45 46 47 48 49 50 51 *Statistical analysis*

52  
53 Using descriptive statistics, we characterized the premarket characteristics of the novel drugs  
54 included in our sample (drugs approved by both the FDA and EMA between 2005 and 2010).  
55  
56  
57  
58  
59  
60

1  
2  
3 Next, we used descriptive statistics to characterize features of all identified post-marketing  
4 studies registered at ClinicalTrials.gov for all novel drugs. We used a series of trend charts  
5 representing the annual number of post-marketing studies over the life-cycle of the drugs  
6 according to off- and on-condition studies. All statistical tests were two-tailed, with a type I  
7 error rate of 0.05. We used SAS 9.4 (SAS Institute; Cary, NC) for all statistical analyses.  
8  
9  
10  
11  
12

## 13 14 15 **Results**

### 16 *Drug sample*

17  
18 Our study sample included 69 novel drugs approved between 2005 and 2010 by both the FDA  
19 and EMA. In all, 51 drugs (73.9%) were small molecules and 18 (26.1%) were biologics  
20 (Table 1). The FDA had granted orphan status to 18 drugs (26.1%) and the EMA an orphan  
21 designation to 20 (29.0%). Among these 69 novel drugs, 24 (34.8%) were first-in-class, 24  
22 (34.8%) advance-in-class and 21 (30.4%) addition-to-class. The most prevalent therapeutic  
23 category was antineoplastic and immunomodulating agents (29% of all novel drugs from the  
24 sample) and many drugs (68.1%) were for chronic treatment. The manufacturer was a large  
25 pharmaceutical company for 44 (63.8%) of the drugs. Other details are in Table 1.  
26  
27  
28  
29  
30  
31  
32  
33  
34  
35  
36  
37

### 38 *Number of post-marketing trials, status and patients recruited*

39  
40  
41  
42 Sequential exclusions leading to our final study sample of 6679 relevant post-marketing  
43 studies related to all 69 novel drugs are in Supplemental Material (S1). Characteristics of all  
44 post-marketing studies are in Table 2. In all, 2901 studies (43.4%) were completed, 487  
45 (7.3%) terminated, 1013 (15.2%) active yet not recruiting, 1895 (28.4%) recruiting, and 319  
46 (4.8%) not yet recruiting. When comparing respective numbers of post-marketing studies and  
47 all clinical studies (preapproval pivotal trials and post-marketing studies), the median  
48 proportion of post-marketing studies per drug was 0.96 (interquartile range [IQR] 0.93-0.98).  
49  
50  
51  
52  
53  
54  
55  
56  
57  
58  
59  
60  
61  
62  
63  
64  
65  
66  
67  
68  
69  
70  
71  
72  
73  
74  
75  
76  
77  
78  
79  
80  
81  
82  
83  
84  
85  
86  
87  
88  
89  
90  
91  
92  
93  
94  
95  
96  
97  
98  
99  
100  
101  
102  
103  
104  
105  
106  
107  
108  
109  
110  
111  
112  
113  
114  
115  
116  
117  
118  
119  
120  
121  
122  
123  
124  
125  
126  
127  
128  
129  
130  
131  
132  
133  
134  
135  
136  
137  
138  
139  
140  
141  
142  
143  
144  
145  
146  
147  
148  
149  
150  
151  
152  
153  
154  
155  
156  
157  
158  
159  
160  
161  
162  
163  
164  
165  
166  
167  
168  
169  
170  
171  
172  
173  
174  
175  
176  
177  
178  
179  
180  
181  
182  
183  
184  
185  
186  
187  
188  
189  
190  
191  
192  
193  
194  
195  
196  
197  
198  
199  
200  
201  
202  
203  
204  
205  
206  
207  
208  
209  
210  
211  
212  
213  
214  
215  
216  
217  
218  
219  
220  
221  
222  
223  
224  
225  
226  
227  
228  
229  
230  
231  
232  
233  
234  
235  
236  
237  
238  
239  
240  
241  
242  
243  
244  
245  
246  
247  
248  
249  
250  
251  
252  
253  
254  
255  
256  
257  
258  
259  
260  
261  
262  
263  
264  
265  
266  
267  
268  
269  
270  
271  
272  
273  
274  
275  
276  
277  
278  
279  
280  
281  
282  
283  
284  
285  
286  
287  
288  
289  
290  
291  
292  
293  
294  
295  
296  
297  
298  
299  
300  
301  
302  
303  
304  
305  
306  
307  
308  
309  
310  
311  
312  
313  
314  
315  
316  
317  
318  
319  
320  
321  
322  
323  
324  
325  
326  
327  
328  
329  
330  
331  
332  
333  
334  
335  
336  
337  
338  
339  
340  
341  
342  
343  
344  
345  
346  
347  
348  
349  
350  
351  
352  
353  
354  
355  
356  
357  
358  
359  
360  
361  
362  
363  
364  
365  
366  
367  
368  
369  
370  
371  
372  
373  
374  
375  
376  
377  
378  
379  
380  
381  
382  
383  
384  
385  
386  
387  
388  
389  
390  
391  
392  
393  
394  
395  
396  
397  
398  
399  
400  
401  
402  
403  
404  
405  
406  
407  
408  
409  
410  
411  
412  
413  
414  
415  
416  
417  
418  
419  
420  
421  
422  
423  
424  
425  
426  
427  
428  
429  
430  
431  
432  
433  
434  
435  
436  
437  
438  
439  
440  
441  
442  
443  
444  
445  
446  
447  
448  
449  
450  
451  
452  
453  
454  
455  
456  
457  
458  
459  
460  
461  
462  
463  
464  
465  
466  
467  
468  
469  
470  
471  
472  
473  
474  
475  
476  
477  
478  
479  
480  
481  
482  
483  
484  
485  
486  
487  
488  
489  
490  
491  
492  
493  
494  
495  
496  
497  
498  
499  
500  
501  
502  
503  
504  
505  
506  
507  
508  
509  
510  
511  
512  
513  
514  
515  
516  
517  
518  
519  
520  
521  
522  
523  
524  
525  
526  
527  
528  
529  
530  
531  
532  
533  
534  
535  
536  
537  
538  
539  
540  
541  
542  
543  
544  
545  
546  
547  
548  
549  
550  
551  
552  
553  
554  
555  
556  
557  
558  
559  
560  
561  
562  
563  
564  
565  
566  
567  
568  
569  
570  
571  
572  
573  
574  
575  
576  
577  
578  
579  
580  
581  
582  
583  
584  
585  
586  
587  
588  
589  
590  
591  
592  
593  
594  
595  
596  
597  
598  
599  
600  
601  
602  
603  
604  
605  
606  
607  
608  
609  
610  
611  
612  
613  
614  
615  
616  
617  
618  
619  
620  
621  
622  
623  
624  
625  
626  
627  
628  
629  
630  
631  
632  
633  
634  
635  
636  
637  
638  
639  
640  
641  
642  
643  
644  
645  
646  
647  
648  
649  
650  
651  
652  
653  
654  
655  
656  
657  
658  
659  
660  
661  
662  
663  
664  
665  
666  
667  
668  
669  
670  
671  
672  
673  
674  
675  
676  
677  
678  
679  
680  
681  
682  
683  
684  
685  
686  
687  
688  
689  
690  
691  
692  
693  
694  
695  
696  
697  
698  
699  
700  
701  
702  
703  
704  
705  
706  
707  
708  
709  
710  
711  
712  
713  
714  
715  
716  
717  
718  
719  
720  
721  
722  
723  
724  
725  
726  
727  
728  
729  
730  
731  
732  
733  
734  
735  
736  
737  
738  
739  
740  
741  
742  
743  
744  
745  
746  
747  
748  
749  
750  
751  
752  
753  
754  
755  
756  
757  
758  
759  
760  
761  
762  
763  
764  
765  
766  
767  
768  
769  
770  
771  
772  
773  
774  
775  
776  
777  
778  
779  
780  
781  
782  
783  
784  
785  
786  
787  
788  
789  
790  
791  
792  
793  
794  
795  
796  
797  
798  
799  
800  
801  
802  
803  
804  
805  
806  
807  
808  
809  
810  
811  
812  
813  
814  
815  
816  
817  
818  
819  
820  
821  
822  
823  
824  
825  
826  
827  
828  
829  
830  
831  
832  
833  
834  
835  
836  
837  
838  
839  
840  
841  
842  
843  
844  
845  
846  
847  
848  
849  
850  
851  
852  
853  
854  
855  
856  
857  
858  
859  
860  
861  
862  
863  
864  
865  
866  
867  
868  
869  
870  
871  
872  
873  
874  
875  
876  
877  
878  
879  
880  
881  
882  
883  
884  
885  
886  
887  
888  
889  
890  
891  
892  
893  
894  
895  
896  
897  
898  
899  
900  
901  
902  
903  
904  
905  
906  
907  
908  
909  
910  
911  
912  
913  
914  
915  
916  
917  
918  
919  
920  
921  
922  
923  
924  
925  
926  
927  
928  
929  
930  
931  
932  
933  
934  
935  
936  
937  
938  
939  
940  
941  
942  
943  
944  
945  
946  
947  
948  
949  
950  
951  
952  
953  
954  
955  
956  
957  
958  
959  
960  
961  
962  
963  
964  
965  
966  
967  
968  
969  
970  
971  
972  
973  
974  
975  
976  
977  
978  
979  
980  
981  
982  
983  
984  
985  
986  
987  
988  
989  
990  
991  
992  
993  
994  
995  
996  
997  
998  
999  
1000

1  
2  
3 median of 55 studies per drug (IQR, 33-119) and mean of 96.8 studies per drug (SD 110.3).  
4  
5 Galsulfase, an orphan medication indicated for Mucopolysaccharidosis VI, was associated  
6  
7 with the lowest number of post-marketing studies (n=3) and sorafenib, a tyrosine kinase  
8  
9 inhibitor initially indicated for kidney cancer, with the highest number of post-marketing  
10  
11 studies (n=530).  
12

13  
14  
15 Planned enrollment was also highly variable, with studies only including one patient, and one  
16  
17 study intending to recruit 904 585 patients (actually a prospective population-based cohort  
18  
19 study examining risk of congenital malformations after use of varenicline, a tobacco-use  
20  
21 cessation drug, in pregnant women). However, the median number of patients to be enrolled  
22  
23 per study was 60 (IQR 28-183). Data on the total population to be enrolled in all post-  
24  
25 marketing studies for a given drug was also highly varied, with a median total sample of  
26  
27 15 418 patients (IQR 4932-37 523). Velaglucerase alfa, an orphan medication indicated for  
28  
29 Gaucher disease, was associated with the lowest population size to be included in studies  
30  
31 (n=67), and varenicline was associated with the greatest population to be enrolled (>1 million  
32  
33 patients overall). Supplemental Material (S2) shows the total number of patients to be  
34  
35 included in post-marketing studies for each drug and proportions of industry and non-industry  
36  
37 funders.  
38  
39

40  
41  
42 Supplemental Material (S3) presents for each drug the number of patients included in  
43  
44 preapproval pivotal trials as compared with post-marketing studies. The median proportion  
45  
46 for the population recruited in post-marketing studies to the total population (i.e., preapproval  
47  
48 samples and post-marketing studies) was 0.95 (IQR 0.90-0.98). Again, alglucidase and  
49  
50 velaglucerase alfa were associated with the lowest number of patients in preapproval pivotal  
51  
52 trials. In contrast, for dabigatran, a drug initially indicated for preventing venous  
53  
54 thromboembolism in the European Union and to reduce the risk of stroke and systemic  
55  
56 embolism in patients with non-valvular atrial fibrillation in the United States, preapproval  
57  
58  
59  
60

1  
2  
3 pivotal trials had recruited the highest number of patients. The same figure also shows the  
4  
5 proportions of patients enrolled in post-marketing studies designed for the originally approved  
6  
7 indication, another indication and both.  
8  
9

### 10 *Trial characteristics*

11  
12 Data regarding study phases are shown in Table 2; only 18.6% of identified post-marketing  
13  
14 studies were considered phase IV studies, whereas the most prevalent category was phase II  
15  
16 studies (32.6%). Data regarding randomization were missing for 2452 post-marketing studies  
17  
18 (36.7%). Among the remaining studies for which these data were available, 3067 were  
19  
20 randomized (72.6%). Other data are in Table 2.  
21  
22  
23

### 24 *Sponsor*

25  
26 Industry funded or partially funded nearly two-thirds of post-marketing studies. Indeed, as  
27  
28 shown in Table 2, industry was the primary sponsor of 2713 studies (40.6%), but when also  
29  
30 considering manufacturers as minority funders, industry was involved in a total of 4176  
31  
32 studies (62.5%). Data regarding post-marketing studies stratified by sponsorship are in Table  
33  
34 2. Figure 1 presents the drug sample with respect to the number of post-marketing studies and  
35  
36 the proportion of industry and non-industry funders for each drug. Supplemental Material (S4)  
37  
38 provides the same information but with a 4-year follow-up for each drug.  
39  
40  
41  
42  
43  
44

### 45 *Conditions addressed in trials*

46  
47 Review of indications showed that 2441 post-marketing studies (36.5%) were launched for  
48  
49 another indication than the originally approved indication. Figure 2 displays the number of  
50  
51 non-approved indications studied in post-marketing studies for each drug of our sample, with  
52  
53 information regarding the more advanced phase for each newly targeted indication. When  
54  
55 comparing those studies with the total number of clinical studies (preapproval pivotal trials  
56  
57  
58  
59  
60

1  
2  
3 and post-marketing studies), we found a median proportion of 0.24 (IQR, 0.09-0.4). The  
4  
5 median proportion for the population recruited in post-marketing studies designed for another  
6  
7 indication than the originally approved indication to the total population from all clinical  
8  
9 studies (preapproval pivotal trials and post-marketing studies) was 0.12 (IQR 0.03-0.33).  
10

11  
12 When analyzing the relationship between the study sponsor and the study indication, we  
13  
14 found that 68.7% of studies designed in the originally-approved indication were sponsored by  
15  
16 industry, as compared to 53.7% of studies designed in another indication ( $p < 0.0001$ ).  
17

18  
19 Findings regarding planned enrollment according to the indication and stratified on funding  
20  
21 origin are in Supplemental Material (eTable). Regardless of the funder, post-marketing studies  
22  
23 targeting originally approved indications planned to enroll more patients than those studying  
24  
25 other indications.  
26

### 27 28 29 *Timing*

30  
31 The annual number of post-marketing studies over the life-cycle of drugs, stratified by  
32  
33 indication, is shown in Figure 3, exhibiting an asymmetric bell pattern, with a rapid increase  
34  
35 in number of post-marketing studies launched, a peak of activity within the third year after the  
36  
37 first regulatory submission, then a progressive decline in number of launched studies.  
38

39  
40 Detailed examination shows a greater proportion of studies designed for another indication  
41  
42 than the originally approved indication at the beginning and end of drug life-cycles.  
43

44  
45 Supplemental Material (S5) is based on the same data but displays information regarding  
46  
47 sponsors. Former post-marketing studies were predominantly funded by industry versus  
48  
49 academic or not-for-profit entities and this proportion increased until the second year after the  
50  
51 first regulatory submission. Afterwards, the proportion of non-industry funders tended to  
52  
53 increase over time.  
54  
55

### 56 57 58 *Location*



1  
2  
3 Overall, 80% of post-marketing studies were conducted in only one country. For 66 drugs, at  
4 least one study was conducted in at least two countries. Sorafenib was the most concerned  
5 drug in this regard, with 74 studies involving at least two countries. Data regarding locations  
6 of studies for each drug are in Supplemental Material (S6). In brief, post-marketing research  
7 was highly concentrated in North America (i.e., United States and/or Canada; 44.8% of all  
8 post-marketing studies of the sample) and Europe (25.0%). Post-marketing studies conducted  
9 in other areas represented 15.6% of all studies, and studies conducted in multiple continents  
10 were few. When examining the relation between study location and study design with respect  
11 to the original label, we found that studies from North America (United States and/or Canada)  
12 were more frequently conducted for indications other than the originally approved indication  
13 versus those located in Europe (50.4% v. 36.9%). Data from Supplemental Materials S2, S3,  
14 and S6 are summarized as Tables in Supplemental Material S7.

### 30 *Supplemental indications*

31  
32  
33 During the study period, 18 novel drugs (26.1%) were associated with a least a supplemental  
34 indication by the FDA: one with 4 supplemental indications, one with 3 supplemental  
35 indications, 5 with two supplemental indications and 11 with one supplemental indication.

36  
37  
38 The mean time between the first regulatory submission and subsequent supplemental  
39 indication was 4.4 years (SD 1.7; IQR 3.3-5.7). The mean number of patients to be enrolled in  
40 post-marketing studies before approval of a supplemental indication was 12763.1 (SD  
41 12474.3; IQR 3891.0-15856.0).

### 42 *Supplemental analysis*

43  
44  
45 Analyses of post-marketing studies shown in Table 2 were also performed when only taking  
46 into account those whose launch started after the first regulatory approval. Put another way,  
47 this supplemental set of analysis led us to exclude the 275 studies (see flow chart in  
48  
49  
50  
51  
52  
53  
54  
55  
56  
57  
58  
59  
60

1  
2  
3 Supplemental Material S1) whose starting date had preceded the first regulatory submission  
4  
5 by 1 year or less. Results are displayed in Supplemental Material S8, showing no obvious  
6  
7 difference with the main set of analysis.  
8  
9

## 10 **Discussion**

11  
12  
13 In our study of post-marketing clinical research studies conducted for novel drugs approved  
14  
15 by both the FDA and EMA between 2005 and 2010, we found high variability in number of  
16  
17 post-marketing studies per drug and planned enrollment per study. Indeed, the median  
18  
19 planned enrollment was low, 60 patients, with a median of 55 studies per drug, most of which  
20  
21 had not yet been completed at a minimum of 4 years after approval. Locations were  
22  
23 concentrated, with 72.3% of post-marketing studies conducted in North America and/or  
24  
25 Europe and 80% conducted in only one country. Approximately 40% of post-marketing  
26  
27 studies were designed for an indication other than the originally approved one, more  
28  
29 frequently concerning studies not involving industry funding. Overall, those findings reflect  
30  
31 the lack of global coordination of post-marketing research for novel drugs.  
32  
33  
34  
35

36  
37 Our study has several strengths. First, we focused on a sample of drugs approved by  
38  
39 the two leading medical product regulators, FDA and EMA, which suggests that these drugs  
40  
41 are likely to be of the greatest interest and importance to clinicians worldwide. Most previous  
42  
43 studies focused on the FDA or EMA but rarely both. [20,22] Second, few comprehensive  
44  
45 studies have analyzed post-marketing research despite its undisputed public health impact. [9–  
46  
47 14] Most research focused on safety or was limited to a given therapeutic area, or even only  
48  
49 one drug. In addition, we chose a large study period, with a 6-year span for drug approvals,  
50  
51 and more than 10 years for the trial sample. Moreover, we followed a rigorous method for  
52  
53 selecting post-marketing studies, excluding clinical trials included in the FDA submission,  
54  
55 studies that had not been launched, studies mistakenly classified as involving the drug in  
56  
57  
58  
59  
60

1  
2  
3 ClinicalTrials.gov and studies whose starting date was too early as compared to regulatory  
4 submission. Third, we provide unique insights into the clinical research programs examining  
5 non-approved drug uses. Many studies have investigated off-label prescriptions, [23,24] but  
6 we used a slightly different approach. In effect, most drug labels are stringently phrased so as  
7 to be rigorously aligned to pivotal trial criteria. [25] Therefore, categorizing studies according  
8 to the actual off- or on-label status of the drug investigated would have led to classifying most  
9 as involving off-label drug use. Put another way, the label was judged too narrow, and our  
10 method offers a more significant picture for clinicians and epidemiologists. We believe that  
11 our classification better reflects substantial evolution regarding the initially authorized use of  
12 novel drugs.  
13  
14  
15  
16  
17  
18  
19  
20  
21  
22  
23  
24

25  
26 Our findings raise several issues worthy of consideration about post-marketing  
27 research. First, we showed that post-marketing research is both a heterogeneous and  
28 concentrated landscape, probably linked to its loose regulation [6] and to market forces.  
29 Therefore, most initiatives are at the discretion of funders, either industry or academic  
30 institutions, and driven by various factors not necessarily linked to medical need or relevancy.  
31 For instance, prior research has shown that many post-marketing trials were “seeding trials”,  
32 designed for marketing purposes rather than scientific relevancy. [7,8] The number of post-  
33 marketing studies per novel drug and planned enrollment were highly variable, but most  
34 studies were conducted in only one country and North America and Europe were by far the  
35 most frequent locations. Median planned enrollment was low and many studies were still not  
36 completed at the time of data acquisition. These findings question the absence of steering or  
37 the lack of effectiveness or incentive policies for post-marketing research. Second, almost  
38 40% of post-marketing studies were designed for an indication other than the originally  
39 approved indication, with non-industry trials more likely concerned. Although industry has  
40 been blamed for testing their products in a too-liberal manner, [26] our findings suggest that  
41  
42  
43  
44  
45  
46  
47  
48  
49  
50  
51  
52  
53  
54  
55  
56  
57  
58  
59  
60

1  
2  
3 academics and other non-industry bodies might be more prone to assess authorized drugs in  
4  
5 innovative ways to evaluate novel indications. Third, we found that post-marketing studies  
6  
7 designed for the originally approved indication planned to enroll a greater number of patients  
8  
9 on average than those targeting novel indications. This latter finding is somewhat reassuring  
10  
11 because post-marketing studies for an already approved indication aim to refine knowledge  
12  
13 regarding the long-term effect and/or safety and should therefore include more patients than  
14  
15 preapproval pivotal trials.  
16

17  
18  
19 Our study has limitations. The first may be a registration bias at ClinicalTrials.gov,  
20  
21 which would alter the exhaustiveness of our assessment. Some studies are not registered by  
22  
23 researchers [27,28] and were therefore not included in our study. Others are imperfectly  
24  
25 registered, with some information missing. However, ClinicalTrials.gov is widely recognized  
26  
27 as a benchmark registry, and recent reports showed that compliance might have improved  
28  
29 over time. [29] Another limitation is the definition of post-marketing studies, in that clinical  
30  
31 studies are designed and launched according to a continuous timing and a single threshold  
32  
33 might be lacking for distinguishing pre- and post-marketing trials. Therefore, we decided to  
34  
35 consider studies starting at most 1 year before the first regulatory submission as post-  
36  
37 marketing studies even though we could have made another choice. A third limitation is  
38  
39 related to data sources. For some data, we relied on only one of the two selected regulators.  
40  
41 We used such an approach for the sake of convenience and recognize that this could be  
42  
43 interpreted as a bias, yet to our knowledge, there are very few if any differences in data  
44  
45 between the two studied regulators. Therefore, this latter limitation in the methods seems  
46  
47 unlikely to affect our findings. Finally, we could not identify whether post-marketing trials  
48  
49 were relevant or useful because we did not analyze their design, endpoints, or comparators,  
50  
51 among other factors.  
52  
53  
54  
55  
56  
57  
58  
59  
60

1  
2  
3 In conclusion, our research shows that post-marketing research is highly variable and  
4 concentrated, with on one hand, great differences in the number of post-marketing studies per  
5 drug and in planned enrollment and on the other, most studies being conducted in only one  
6 country, with North America and Europe the most represented locations. Approximately 40%  
7 of post-marketing studies assessed the drug for an indication other than the originally  
8 approved indication, more frequently non-industry studies. Even though some of our findings  
9 can be seen as reassuring, others underline the lack of global coordination of post-marketing  
10 research for novel drugs despite the undisputed influence of such research.  
11  
12  
13  
14  
15  
16  
17  
18  
19  
20  
21  
22  
23

24 **Contributors:** Dr. Zeitoun and Pr. Ravaud were responsible for the conception and design of  
25 this work. Dr. Zeitoun drafted the manuscript and was responsible for most of the data  
26 acquisition. M. Ignacio Atal was responsible for data exportation and structuration. Dr.  
27 Alexandre Vivot was responsible for collection of some data and contributed to categorization  
28 of studies. Dr. Nicholas Downing was responsible for some of the data acquisition. Dr.  
29 Gabriel Baron conducted the statistical analysis. Drs. Ross and Ravaud provided supervision.  
30 All authors participated in the analysis and interpretation of the data and critically revised the  
31 manuscript for important intellectual content.  
32  
33  
34  
35  
36  
37  
38  
39  
40  
41  
42

43 **Data sharing statement:** Data files are available from the corresponding author on  
44 reasonable request.  
45  
46  
47

48 **Acknowledgements:** The authors are grateful to EMA officials who graciously helped them  
49 classify drug manufacturers. They also thank Geoffroy Beraud-Chaulet for his useful work on  
50 Drugs@FDA and Elise Diard for her invaluable help on figures.  
51  
52  
53  
54

## 55 **References**

56  
57  
58  
59  
60

- 1 Ball R, Robb M, Anderson S, *et al*. The FDA's sentinel initiative—A comprehensive  
2 approach to medical product surveillance. *Clin Pharmacol Ther* 2016;**99**:265–8.  
3 doi:10.1002/cpt.320  
4
- 5 European Medicines Agency. Post-authorisation procedural Q&A - Post-authorisation  
6 measures: questions and answers.  
7 [http://www.ema.europa.eu/ema/index.jsp?curl=pages/regulation/q\\_and\\_a/q\\_and\\_a\\_detail\\_000](http://www.ema.europa.eu/ema/index.jsp?curl=pages/regulation/q_and_a/q_and_a_detail_000037.jsp)  
8 [037.jsp](http://www.ema.europa.eu/ema/index.jsp?curl=pages/regulation/q_and_a/q_and_a_detail_000037.jsp) (accessed 8 Sep 2017).  
9
- 10 United States Government Accountability Office. Drug Safety: FDA Expedites Many  
11 Applications, But Data for Postapproval Oversight Need Improvement. 2015.  
12 <http://www.gao.gov/products/GAO-16-192> (accessed 15 Nov 2016).  
13
- 14 Fain K, Daubresse M, Alexander G. The food and drug administration amendments  
15 act and postmarketing commitments. *JAMA* 2013;**310**:202–4. doi:10.1001/jama.2013.7900  
16
- 17 Hoekman J, Klamer TT, Mantel-Teeuwisse AK, *et al*. Characteristics and follow-up of  
18 postmarketing studies of conditionally authorized medicines in the EU. *Br J Clin Pharmacol*  
19 2016;**82**:213–26. doi:10.1111/bcp.12940  
20
- 21 London AJ, Kimmelman J, Carlisle B. Research ethics. Rethinking research ethics: the  
22 case of postmarketing trials. *Science* 2012;**336**:544–5. doi:10.1126/science.1216086  
23
- 24 Alexander GC. Seeding trials and the subordination of science. *Arch Intern Med*  
25 2011;**171**:1107–8. doi:10.1001/archinternmed.2011.232  
26
- 27 Barbour V, Burch D, Godlee F, *et al*. Characterisation of trials where marketing  
28 purposes have been influential in study design: a descriptive study. *Trials* 2016;**17**:31.  
29 doi:10.1186/s13063-015-1107-1  
30
- 31 Rathi VK, Krumholz HM, Masoudi FA, *et al*. Characteristics of clinical studies  
32 conducted over the total product life cycle of high-risk therapeutic medical devices receiving  
33 fda premarket approval in 2010 and 2011. *JAMA* 2015;**314**:604–12.  
34 doi:10.1001/jama.2015.8761  
35
- 36 Reynolds RF, Lem JA, Gatto NM, *et al*. Is the large simple trial design used for  
37 comparative, post-approval safety research? A review of a clinical trials registry and the  
38 published literature. *Drug Saf* 2011;**34**:799–820. doi:10.2165/11593820-000000000-00000  
39
- 40 Tang E, Ravaud P, Riveros C, *et al*. Comparison of serious adverse events posted at  
41 ClinicalTrials.gov and published in corresponding journal articles. *BMC Med* 2015;**13**:189.  
42 doi:10.1186/s12916-015-0430-4  
43
- 44 Bachert C, Maurer M. Safety and efficacy of desloratadine in subjects with seasonal  
45 allergic rhinitis or chronic urticaria: results of four postmarketing surveillance studies. *Clin*  
46 *Drug Investig* 2010;**30**:109–22. doi:10.2165/11530930-000000000-00000  
47

- 1  
2  
3 13 Yeh RW, Kennedy K, Spertus JA, *et al.* Do postmarketing surveillance studies  
4 represent real-world populations? A comparison of patient characteristics and outcomes after  
5 carotid artery stenting. *Circulation* 2011;**123**:1384–90.  
6 doi:10.1161/CIRCULATIONAHA.110.991075  
7
- 8  
9 14 Inrig JK, Califf RM, Tasneem A, *et al.* The landscape of clinical trials in nephrology:  
10 a systematic review of Clinicaltrials.gov. *Am J Kidney Dis Off J Natl Kidney Found*  
11 2014;**63**:771–80. doi:10.1053/j.ajkd.2013.10.043  
12
- 13 15 Endrikat J, Vogtlaender K, Dohanish S, *et al.* Safety of Gadobutrol: Results From 42  
14 Clinical Phase II to IV Studies and Postmarketing Surveillance After 29 Million Applications.  
15 *Invest Radiol* 2016;**51**:537–43. doi:10.1097/RLI.0000000000000270  
16
- 17 16 Drugs@FDA: FDA Approved Drug Products.  
18 <http://www.accessdata.fda.gov/scripts/cder/drugsatfda/index.cfm> (accessed 15 Nov 2016).  
19
- 20 17 European Medicines Agency - Find medicine - European public assessment reports.  
21 [http://www.ema.europa.eu/ema/index.jsp?curl=pages/medicines/landing/epar\\_search.jsp&mid=WC0b01ac058001d124](http://www.ema.europa.eu/ema/index.jsp?curl=pages/medicines/landing/epar_search.jsp&mid=WC0b01ac058001d124) (accessed 15 Nov 2016).  
22  
23  
24  
25
- 26 18 World Health Organization (WHO) Collaborating Center for Drug Statistics  
27 Methodology. ATC classification index with DDDs, 2014.  
28 2014.[http://www.whocc.no/atc\\_ddd\\_index/](http://www.whocc.no/atc_ddd_index/)  
29
- 30 19 Lanthier M, Miller KL, Nardinelli C, *et al.* An Improved Approach To Measuring  
31 Drug Innovation Finds Steady Rates Of First-In-Class Pharmaceuticals, 1987–2011. *Health*  
32 *Aff (Millwood)* 2013;**32**:1433–9. doi:10.1377/hlthaff.2012.0541  
33  
34
- 35 20 Downing NS, Aminawung JA, Shah ND, *et al.* Clinical trial evidence supporting FDA  
36 approval of novel therapeutic agents, 2005-2012. *JAMA* 2014;**311**:368–77.  
37 doi:10.1001/jama.2013.282034  
38
- 39 21 Lozano R, Naghavi M, Foreman K, *et al.* Global and regional mortality from 235  
40 causes of death for 20 age groups in 1990 and 2010: a systematic analysis for the Global  
41 Burden of Disease Study 2010. *The Lancet* 2012;**380**:2095–128. doi:10.1016/S0140-  
42 6736(12)61728-0  
43  
44
- 45 22 Zeitoun J-D, Lefèvre JH, Downing NS, *et al.* Regulatory review time and post-market  
46 safety events for novel medicines approved by the EMA between 2001 and 2010: a cross-  
47 sectional study. *Br J Clin Pharmacol* 2015;**80**:716–26. doi:10.1111/bcp.12643  
48  
49
- 50 23 Eguale T, Buckeridge DL, Verma A, *et al.* Association of Off-label Drug Use and  
51 Adverse Drug Events in an Adult Population. *JAMA Intern Med* 2016;**176**:55–63.  
52 doi:10.1001/jamainternmed.2015.6058  
53  
54
- 55 24 Danés I, Agustí A, Vallano A, *et al.* Outcomes of off-label drug uses in hospitals: a  
56 multicentric prospective study. *Eur J Clin Pharmacol* 2014;**70**:1385–93. doi:10.1007/s00228-  
57 014-1746-2  
58  
59  
60

- 1  
2  
3 25 Eichler H-G, Abadie E, Breckenridge A, *et al.* Bridging the efficacy-effectiveness gap:  
4 a regulator's perspective on addressing variability of drug response. *Nat Rev Drug Discov*  
5 2011;**10**:495–506. doi:10.1038/nrd3501  
6
- 7 26 Smith R, Gøtzsche PC, Groves T. Should journals stop publishing research funded by  
8 the drug industry? *BMJ* 2014;**348**:g171.  
9
- 10 27 Boccia S, Rothman KJ, Panic N, *et al.* Registration practices for observational studies  
11 on ClinicalTrials.gov indicated low adherence. *J Clin Epidemiol* 2016;**70**:176–82.  
12 doi:10.1016/j.jclinepi.2015.09.009  
13
- 14 28 Dal-Ré R, Ross JS, Marušić A. Compliance with prospective trial registration  
15 guidance remained low in high-impact journals and has implications for primary end point  
16 reporting. *J Clin Epidemiol* 2016;**75**:100–7. doi:10.1016/j.jclinepi.2016.01.017  
17
- 18 29 Viergever RF, Li K. Trends in global clinical trial registration: an analysis of numbers  
19 of registered clinical trials in different parts of the world from 2004 to 2013. *BMJ Open*  
20 2015;**5**:e008932. doi:10.1136/bmjopen-2015-008932  
21  
22  
23  
24  
25  
26  
27  
28  
29  
30  
31  
32  
33  
34  
35  
36  
37  
38  
39  
40  
41  
42  
43  
44  
45  
46  
47  
48  
49  
50  
51  
52  
53  
54  
55  
56  
57  
58  
59  
60



## Legends

Figure 1: Number of post-marketing studies and respective proportion of industry and non-industry funders.

Figure 2: Number of non-approved indications targeted in post-marketing studies for each drug of our study sample. Indications are rank-ordered on the basis of the number of post-marketing studies launched (from the greatest number of post-marketing studies on the left side of the figure to the lowest number on the right side). Color of boxes varies according to the advanced phase of the targeted indication. Indications are classified according to the Global Burden of Diseases classification. [21] Indications belonging to residual categories or health conditions not relevant to the Global Burden of Diseases were excluded and therefore are not represented in the Figure.

Figure 3: Annual number of post-marketing studies over the life-cycle of drugs, stratified by indication.

Supplemental File S1: Flow chart leading to the final study sample of 6679 relevant post-marketing studies.

Supplemental File S2: Total number of patients to be included in post-marketing studies for each drug.

Supplemental File S3: Population in preapproval pivotal trials and post-marketing studies.

Supplemental File S4: Number of post-marketing studies and respective proportion of industry and non-industry funders, with a 4-year follow-up for each drug.

1  
2  
3 Supplemental File S5: Annual number of post-marketing studies over the life-cycle of drugs,  
4  
5 stratified by sponsor.  
6  
7

8 Supplemental File S6: Locations of post-marketing studies.  
9  
10

11 Supplemental File S7: Data from S2, S3 and S6, presented as tables.  
12  
13

14 Supplemental File S8: Characteristics of industry and non-industry post-marketing studies  
15  
16 when solely taking into account those whose launch started after the first regulatory approval.  
17  
18  
19  
20  
21  
22  
23  
24  
25  
26  
27  
28  
29  
30  
31  
32  
33  
34  
35  
36  
37  
38  
39  
40  
41  
42  
43  
44  
45  
46  
47  
48  
49  
50  
51  
52  
53  
54  
55  
56  
57  
58  
59  
60

Table 1. Characteristics of 69 novel drugs approved by both the FDA and EMA between 2005 and 2010 (excluding everolimus and temsirolimus).

| Characteristics                                               | n (%)      |
|---------------------------------------------------------------|------------|
| <b>Agent type</b>                                             |            |
| Small molecule                                                | 51 (73.9%) |
| Biologic                                                      | 18 (26.1%) |
| Orphan status (FDA)                                           | 18 (26.1%) |
| Orphan designation (EMA)                                      | 20 (29.0%) |
| Accelerated approval (FDA)                                    | 14 (20.3%) |
| <b>Therapeutic class according to the ATC classification</b>  |            |
| Alimentary tract and metabolism                               | 10 (14.5%) |
| Anti-infectives for systemic use                              | 12 (17.4%) |
| Antineoplastic and immunomodulating agents                    | 20 (29.0%) |
| Blood and blood forming organs                                | 5 (7.2%)   |
| Cardiovascular system                                         | 5 (7.2%)   |
| Nervous system                                                | 6 (8.7%)   |
| Other*                                                        | 11 (15.9%) |
| <b>Degree of novelty (according to Lanthier <i>et al</i>)</b> |            |
| First-in-class                                                | 24 (34.8%) |
| Advance-in-class                                              | 24 (34.8%) |
| Addition-to-class                                             | 21 (30.4%) |
| <b>Size of the marketing-authorization holder</b>             |            |
| Large pharmaceutical company                                  | 44 (63.8%) |
| Intermediated-size company                                    | 23 (33.3%) |
| Small- and medium-size company                                | 2 (2.9%)   |
| <b>Premarket evidence</b>                                     |            |

|                                     |                |
|-------------------------------------|----------------|
| Total no. of included patients      |                |
| Min/max                             | 18/18040       |
| Median [Q1-Q3]                      | 923 [324-1996] |
| Mean (SD)                           | 1806 (2897)    |
| <b>Expected length of treatment</b> |                |
| Acute                               | 8 (11.6%)      |
| Intermediate                        | 14 (20.3%)     |
| Chronic                             | 47 (68.1%)     |

ATC, Anatomical Therapeutic Chemical

\*includes dermatological, genitourinary system and sex hormones, musculoskeletal system, sensory organs, systemic hormonal preparations, excluding sex hormones, and others

Table 2. Characteristics of industry and non-industry post-marketing studies registered at ClinicalTrials.gov before September 24, 2014 for the 69 novel drugs in the study sample.

| <b>Characteristics</b>                                                 |                | <b>All<br/>(n=6679)</b> | <b>Industry studies<br/>(n=4176)</b> | <b>Non-industry studies<br/>(n=2503)</b> |
|------------------------------------------------------------------------|----------------|-------------------------|--------------------------------------|------------------------------------------|
| <b>Primary sponsor</b>                                                 | Industry       | 2713 (40.6%)            |                                      |                                          |
|                                                                        | NIH            | 286 (4.3%)              |                                      |                                          |
|                                                                        | US Fed         | 15 (0.2%)               |                                      |                                          |
|                                                                        | Other          | 3665 (54.9%)            |                                      |                                          |
| <b>Industry involved either as a primary sponsor or a collaborator</b> |                | 4176 (62.5%)            |                                      |                                          |
| <b>No. of post-marketing studies per drug</b>                          | Min/max        | 3/530                   |                                      |                                          |
|                                                                        | Median [Q1-Q3] | 55 [30-119]             |                                      |                                          |
|                                                                        | Mean (SD)      | 96.8 (110.3)            |                                      |                                          |
| <b>Population size per drug</b>                                        | Min/max        | 67/1.05E6               |                                      |                                          |
|                                                                        | Median [Q1-Q3] | 15418 [4932-37523]      |                                      |                                          |
|                                                                        | Mean (SD)      | 62748 (166644)          |                                      |                                          |

|                                                   |                                                                |              |              |              |
|---------------------------------------------------|----------------------------------------------------------------|--------------|--------------|--------------|
| <b>Therapeutic class according to the ATC</b>     |                                                                |              |              |              |
| Alimentary tract and metabolism                   |                                                                | 832 (12.5%)  | 570 (68.5%)  | 262 (31.5%)  |
| Anti-infectives for systemic use                  |                                                                | 828 (12.4%)  | 504 (60.9%)  | 324 (39.1%)  |
| Antineoplastic and immunomodulating agents        |                                                                | 3040 (45.5%) | 1818 (59.8%) | 1222 (40.2%) |
| Blood and blood forming organs                    |                                                                | 446 (6.7%)   | 277 (62.1%)  | 169 (37.9%)  |
| Nervous system                                    |                                                                | 485 (7.3%)   | 304 (62.7%)  | 181 (37.3%)  |
| Other*                                            |                                                                | 1048 (15.7%) | 703 (67.1%)  | 345 (32.9%)  |
| <b>Study design with respect to primary label</b> | Another indication than the originally approved indication     | 2441 (36.5%) | 1310 (53.6%) | 1131 (46.4%) |
|                                                   | Originally approved indication                                 | 3993 (59.8%) | 2742 (68.7%) | 1251 (31.3%) |
|                                                   | Both the originally approved indication and another indication | 245 (3.7%)   | 124 (50.6%)  | 121 (49.3%)  |
| <b>Study type</b>                                 | Observational                                                  | 707 (10.6%)  | 468 (66.2%)  | 239 (33.8%)  |
|                                                   | Interventional                                                 | 5972 (89.4%) | 3708 (62.1%) | 2264 (37.9%) |

1  
2  
3  
4  
5  
6  
7  
8  
9  
10  
11  
12  
13  
14  
15  
16  
17  
18  
19  
20  
21  
22  
23  
24  
25  
26  
27  
28  
29  
30  
31  
32  
33  
34  
35  
36  
37  
38  
39  
40  
41  
42  
43  
44  
45  
46  
47  
48  
49

|                      |                |              |              |              |
|----------------------|----------------|--------------|--------------|--------------|
| <b>Randomization</b> | Missing data   | 2452         | 1428         | 1024         |
|                      | Yes            | 3067 (72.6%) | 1979 (64.5%) | 1088 (35.5%) |
|                      | No             | 1160 (27.4%) | 769 (66.3%)  | 391 (33.7%)  |
| <b>Study phase</b>   | Missing data   | 1052         | 554          | 498          |
|                      | 0              | 34 (0.6%)    | 13 (38.2%)   | 21 (61.8%)   |
|                      | I              | 933 (16.6%)  | 651 (69.8%)  | 282 (30.2%)  |
|                      | I/II           | 423 (7.5%)   | 245 (58.0%)  | 178 (42.0%)  |
|                      | II             | 1837 (32.6%) | 1047 (57.0%) | 790 (43.0%)  |
|                      | II/III         | 109 (1.9%)   | 52 (47.7%)   | 57 (52.3%)   |
|                      | III            | 1246 (22.1%) | 1018 (81.7%) | 228 (18.3%)  |
|                      | IV             | 1045 (18.6%) | 596 (57.0%)  | 449 (43.0%)  |
| <b>Centers</b>       | Missing data   | 503          | 428          | 75           |
|                      | Min/max        | 1/1616       | 1/1616       | 1/922        |
|                      | Median [Q1-Q3] | 2 [1-12]     | 4 [1-23]     | 1 [1-2]      |
|                      | Mean (SD)      | 19.9 (62.1)  | 26.4 (70.5)  | 9.8 (44.7)   |
| <b>Countries</b>     | Missing data   | 501          | 427          | 74           |
|                      | Min/max        | 1/46         | 1/46         | 1/15         |
|                      | Median [Q1-Q3] | 1 [1-1]      | 1 [1-2]      | 1 [1-1]      |

|                                               |                         |                 |                 |                |
|-----------------------------------------------|-------------------------|-----------------|-----------------|----------------|
|                                               | Mean (SD)               | 2.6 (4.7)       | 3.6 (5.8)       | 1.1 (0.7)      |
| <b>Planned enrollment</b>                     | Missing data            | 14              | 9               | 5              |
|                                               | Min/max                 | 1/904585        | 1/904585        | 1/61050        |
|                                               | Median [Q1-Q3]          | 60 [28-183]     | 72 [30-248]     | 48 [24-100]    |
|                                               | Mean (SD)               | 649.6 (12812.2) | 943.8 (16167.1) | 158.9 (1274.7) |
| <b>Status at the time of data exportation</b> | Not yet recruiting      | 319 (4.8%)      | 136 (42.6%)     | 183 (57.4%)    |
|                                               | Recruiting              | 1895 (28.4%)    | 886 (46.8%)     | 1009 (53.2%)   |
|                                               | Active, not recruiting  | 1013 (15.2%)    | 627 (61.9%)     | 386 (38.1%)    |
|                                               | Enrolling by invitation | 64 (1.0%)       | 42 (65.6%)      | 22 (34.4%)     |
|                                               | Completed               | 2901 (43.4%)    | 2147 (74.0%)    | 754 (26.0%)    |
|                                               | Terminated              | 487 (7.3%)      | 338 (69.4%)     | 149 (30.6%)    |

NIH, US National Institutes of Health

\*includes cardiovascular system, dermatological, genitourinary system and sex hormones, musculoskeletal system, sensory organs, systemic hormonal preparations, excluding sex hormones, and other



1  
2  
3  
4  
5  
6  
7  
8  
9  
10  
11  
12  
13  
14  
15  
16  
17  
18  
19  
20  
21  
22  
23  
24  
25  
26  
27  
28  
29  
30  
31  
32  
33  
34  
35  
36  
37  
38  
39  
40  
41  
42  
43  
44  
45  
46  
47  
48  
49  
50  
51  
52  
53  
54  
55  
56  
57  
58  
59  
60

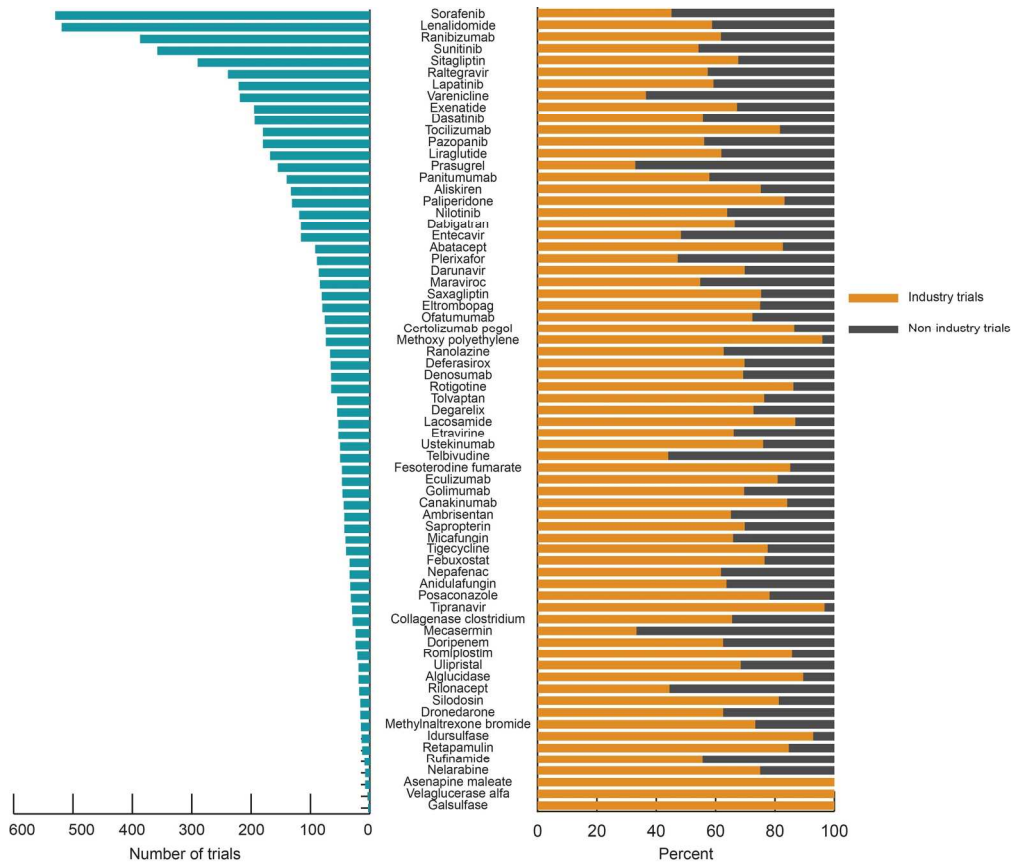

Figure 1

179x153mm (300 x 300 DPI)

1  
2  
3  
4  
5  
6  
7  
8  
9  
10  
11  
12  
13  
14  
15  
16  
17  
18  
19  
20  
21  
22  
23  
24  
25  
26  
27  
28  
29  
30  
31  
32  
33  
34  
35  
36  
37  
38  
39  
40  
41  
42  
43  
44  
45  
46  
47  
48  
49  
50  
51  
52  
53  
54  
55  
56  
57  
58  
59  
60



Figure 2

215x279mm (300 x 300 DPI)

1  
2  
3  
4  
5  
6  
7  
8  
9  
10  
11  
12  
13  
14  
15  
16  
17  
18  
19  
20  
21  
22  
23  
24  
25  
26  
27  
28  
29  
30  
31  
32  
33  
34  
35  
36  
37  
38  
39  
40  
41  
42  
43  
44  
45  
46  
47  
48  
49  
50  
51  
52  
53  
54  
55  
56  
57  
58  
59  
60



Figure 3

105x51mm (300 x 300 DPI)

For peer review only

Supplemental Material 1. Sample construction of relevant post-marketing trials related to all 69 novel drugs both approved by the FDA and the EMA between 2005 and 2010, after exclusion of everolimus and temsirolimus

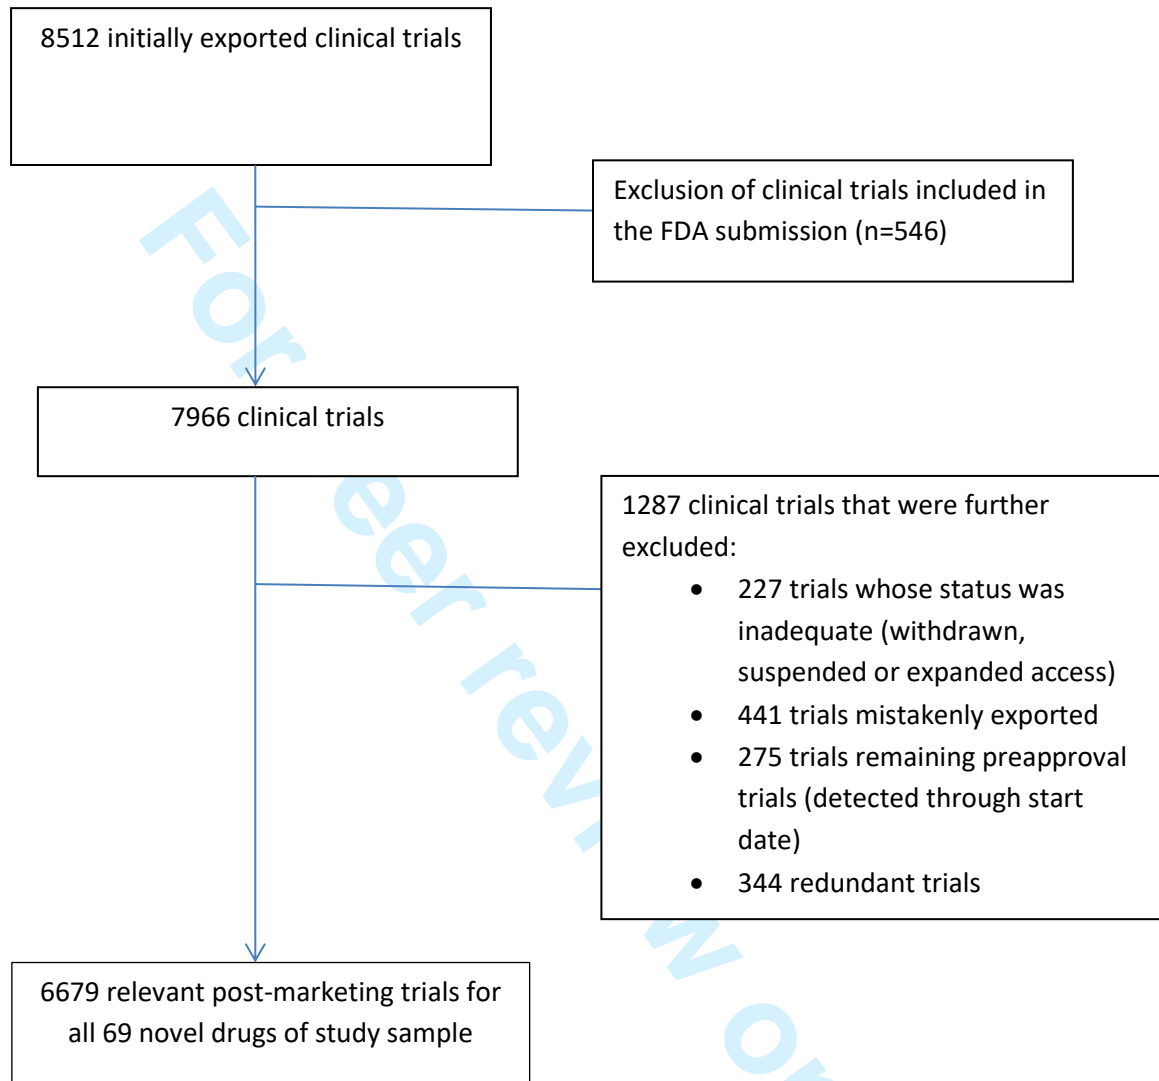

1  
2  
3  
4  
5  
6  
7  
8  
9  
10  
11  
12  
13  
14  
15  
16  
17  
18  
19  
20  
21  
22  
23  
24  
25  
26  
27  
28  
29  
30  
31  
32  
33  
34  
35  
36  
37  
38  
39  
40  
41  
42  
43  
44  
45  
46  
47  
48  
49  
50  
51  
52  
53  
54  
55  
56  
57  
58  
59  
60

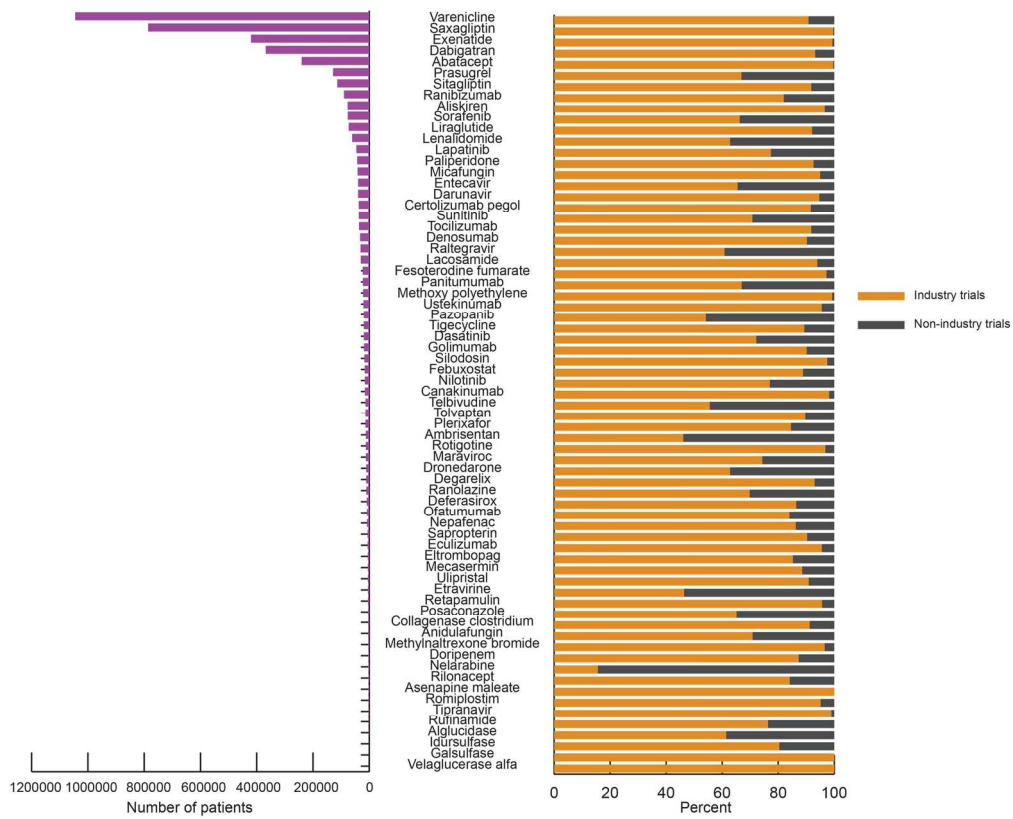

165x133mm (300 x 300 DPI)

For peer review only

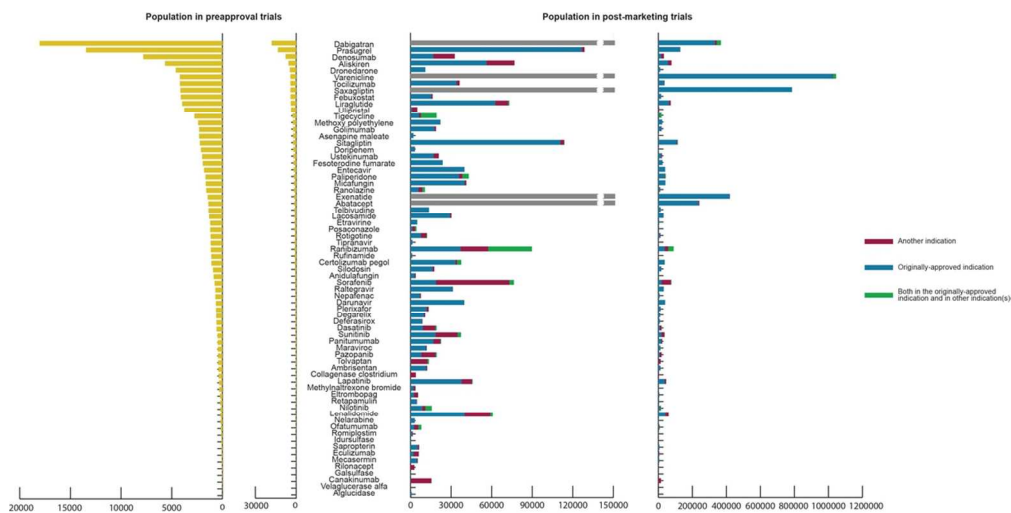

106x53mm (300 x 300 DPI)

review only

1  
2  
3  
4  
5  
6  
7  
8  
9  
10  
11  
12  
13  
14  
15  
16  
17  
18  
19  
20  
21  
22  
23  
24  
25  
26  
27  
28  
29  
30  
31  
32  
33  
34  
35  
36  
37  
38  
39  
40  
41  
42  
43  
44  
45  
46  
47  
48  
49  
50  
51  
52  
53  
54  
55  
56  
57  
58  
59  
60



179x153mm (300 x 300 DPI)

only

1  
2  
3  
4  
5  
6  
7  
8  
9  
10  
11  
12  
13  
14  
15  
16  
17  
18  
19  
20  
21  
22  
23  
24  
25  
26  
27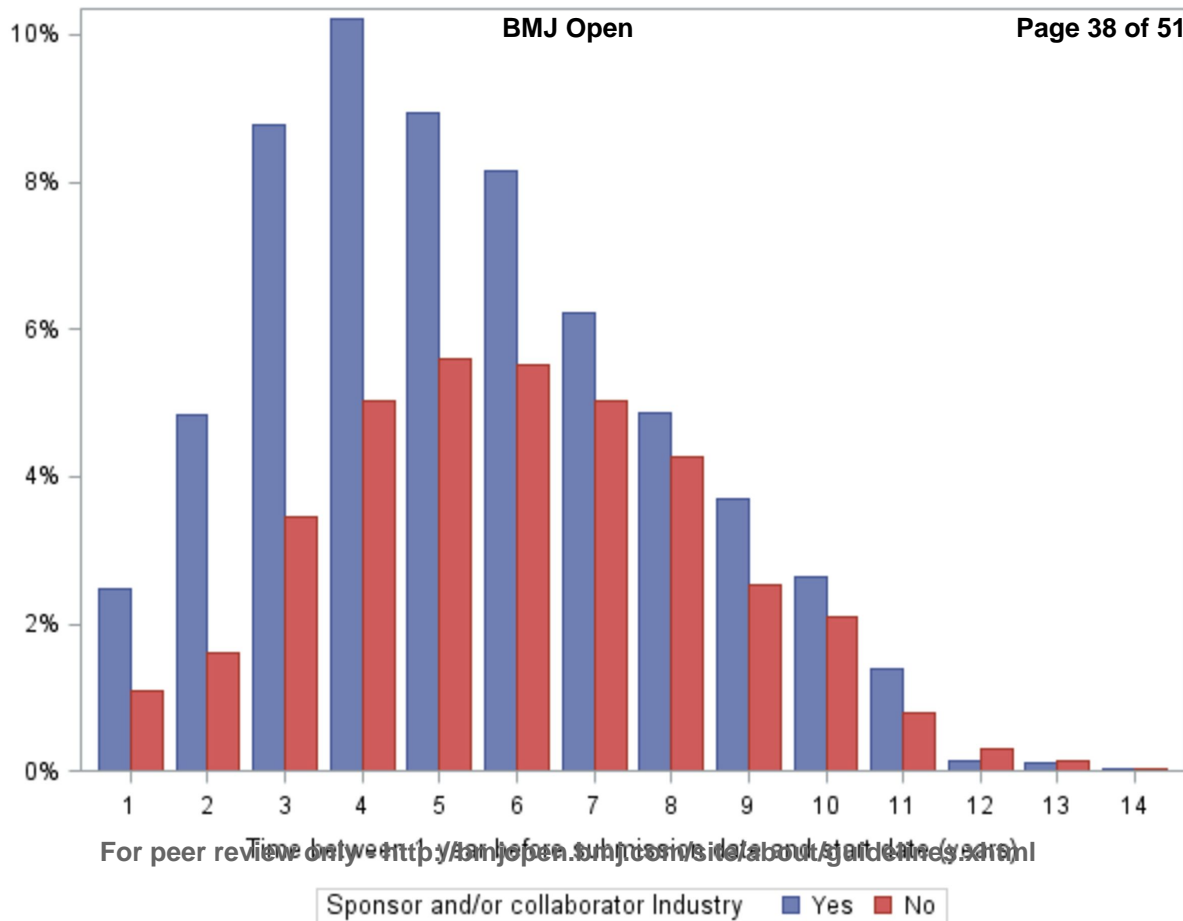



1  
2  
3  
4  
5  
6  
7  
8  
9  
10  
11  
12  
13  
14  
15  
16  
17  
18  
19  
20  
21  
22  
23  
24  
25  
26  
27  
28  
29  
30  
31  
32  
33  
34  
35  
36  
37  
38  
39  
40  
41  
42  
43  
44  
45  
46  
47  
48  
49  
50  
51  
52  
53  
54  
55  
56  
57  
58  
59  
60



184x179mm (300 x 300 DPI)

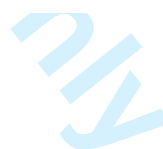

Supplemental file S2 bis: Total number of patients to be included in post-marketing studies for each drug

| Drug                  | Total number of patients to be included in post-marketing studies | Percentage of industry funders | Percentage of non-industry funders |
|-----------------------|-------------------------------------------------------------------|--------------------------------|------------------------------------|
| Varenicline           | 1045002                                                           | 90.8                           | 9.2                                |
| Saxagliptin           | 785853                                                            | 99.6                           | 0.4                                |
| Exenatide             | 420256                                                            | 99.3                           | 0.7                                |
| Dabigatran            | 368063                                                            | 93.1                           | 6.9                                |
| Abatacept             | 240227                                                            | 99.6                           | 0.4                                |
| Prasugrel             | 128744                                                            | 66.9                           | 33.1                               |
| Sitagliptin           | 113824                                                            | 91.8                           | 8.2                                |
| Ranibizumab           | 89765                                                             | 81.9                           | 18.1                               |
| Aliskiren             | 76864                                                             | 96.6                           | 3.4                                |
| Sorafenib             | 76434                                                             | 66.2                           | 33.8                               |
| Liraglutide           | 73106                                                             | 92.0                           | 8.0                                |
| Lenalidomide          | 60805                                                             | 62.8                           | 37.2                               |
| Lapatinib             | 45881                                                             | 77.4                           | 22.6                               |
| Paliperidone          | 43024                                                             | 92.6                           | 7.4                                |
| Micafungin            | 41363                                                             | 95.0                           | 5.0                                |
| Entecavir             | 39787                                                             | 65.5                           | 34.5                               |
| Darunavir             | 39773                                                             | 94.7                           | 5.3                                |
| Certolizumab pegol    | 37523                                                             | 91.6                           | 8.4                                |
| Sunitinib             | 37320                                                             | 70.7                           | 29.3                               |
| Tocilizumab           | 36262                                                             | 91.8                           | 8.2                                |
| Denosumab             | 32688                                                             | 90.2                           | 9.8                                |
| Raltegravir           | 31285                                                             | 60.8                           | 39.2                               |
| Lacosamide            | 30236                                                             | 93.9                           | 6.1                                |
| Fesoterodine fumarate | 23699                                                             | 97.2                           | 2.8                                |
| Panitumumab           | 22585                                                             | 66.9                           | 33.1                               |
| Methoxy polyethylene  | 22102                                                             | 99.2                           | 0.8                                |
| Ustekinumab           | 20873                                                             | 95.5                           | 4.5                                |
| Pazopanib             | 19332                                                             | 54.1                           | 45.9                               |
| Tigecycline           | 19322                                                             | 89.3                           | 10.7                               |
| Dasatinib             | 19320                                                             | 72.2                           | 27.8                               |
| Golimumab             | 18801                                                             | 90.1                           | 9.9                                |
| Silodosin             | 17591                                                             | 97.5                           | 2.5                                |
| Febuxostat            | 16330                                                             | 88.8                           | 11.2                               |
| Nilotinib             | 15657                                                             | 77.0                           | 23.0                               |
| Canakinumab           | 15418                                                             | 98.2                           | 1.8                                |
| Telbivudine           | 13590                                                             | 55.6                           | 44.4                               |
| Tolvaptan             | 13552                                                             | 89.7                           | 10.3                               |
| Plerixafor            | 13450                                                             | 84.6                           | 15.4                               |
| Ambrisentan           | 12300                                                             | 46.1                           | 53.9                               |

| Drug                     | Total number of patients to be included in post-marketing studies | Percentage of industry funders | Percentage of non-industry funders |
|--------------------------|-------------------------------------------------------------------|--------------------------------|------------------------------------|
| Rotigotine               | 12258                                                             | 96.8                           | 3.2                                |
| Maraviroc                | 11957                                                             | 74.3                           | 25.7                               |
| Dronedarone              | 10947                                                             | 62.7                           | 37.3                               |
| Degarelix                | 10811                                                             | 93.0                           | 7.0                                |
| Ranolazine               | 10614                                                             | 69.8                           | 30.2                               |
| Deferasirox              | 8812                                                              | 86.4                           | 13.6                               |
| Ofatumumab               | 7988                                                              | 84.0                           | 16.0                               |
| Nepafenac                | 7627                                                              | 86.2                           | 13.8                               |
| Sapropterin              | 6328                                                              | 90.3                           | 9.7                                |
| Eculizumab               | 6065                                                              | 95.5                           | 4.5                                |
| Eltrombopag              | 5590                                                              | 85.2                           | 14.8                               |
| Mecasermin               | 5291                                                              | 88.5                           | 11.5                               |
| Ulipristal               | 4932                                                              | 90.9                           | 9.1                                |
| Etravirine               | 4881                                                              | 46.4                           | 53.6                               |
| Retapamulin              | 4819                                                              | 95.6                           | 4.4                                |
| Posaconazole             | 4391                                                              | 65.1                           | 34.9                               |
| Collagenase clostridium  | 3897                                                              | 91.2                           | 8.8                                |
| Anidulafungin            | 3819                                                              | 70.8                           | 29.2                               |
| Methylnaltrexone bromide | 3581                                                              | 96.6                           | 3.4                                |
| Doripenem                | 3204                                                              | 87.3                           | 12.7                               |
| Nelarabine               | 3104                                                              | 15.6                           | 84.4                               |
| Rilonacept               | 2790                                                              | 84.1                           | 15.9                               |
| Asenapine maleate        | 2179                                                              | 100.0                          | 0.0                                |
| Romiplostim              | 1627                                                              | 95.1                           | 4.9                                |
| Tipranavir               | 1401                                                              | 98.9                           | 1.1                                |
| Rufinamide               | 1174                                                              | 76.3                           | 23.7                               |
| Alglucidase              | 803                                                               | 61.4                           | 38.6                               |
| Idursulfase              | 408                                                               | 80.4                           | 19.6                               |
| Galsulfase               | 269                                                               | 100.0                          | 0.0                                |
| Velaglucerase alfa       | 67                                                                | 100.0                          | 0.0                                |

## Supplemental file S3 bis: Population in preapproval pivotal trials and post-marketing studies

| Drug                  | Population in preapproval pivotal trials | Population in post-marketing studies |                                |                                                                   | Total   |
|-----------------------|------------------------------------------|--------------------------------------|--------------------------------|-------------------------------------------------------------------|---------|
|                       |                                          | Another indication                   | Originally-approved indication | Both in originally approved indication and in other(s) indication |         |
| Dabigatran            | 18040                                    | 10896                                | 332151                         | 25016                                                             | 368063  |
| Prasugrel             | 13457                                    | 1960                                 | 126669                         | 115                                                               | 128744  |
| Denosumab             | 7808                                     | 15825                                | 16863                          | 0                                                                 | 32688   |
| Aliskiren             | 5663                                     | 20625                                | 56239                          | 0                                                                 | 76864   |
| Dronedarone           | 4604                                     | 20                                   | 10927                          | 0                                                                 | 10947   |
| Varenicline           | 4198                                     | 1847                                 | 1024229                        | 18926                                                             | 1045002 |
| Tocilizumab           | 4190                                     | 2201                                 | 34061                          | 0                                                                 | 36262   |
| Saxagliptin           | 4148                                     | 396                                  | 785457                         | 0                                                                 | 785853  |
| Febuxostat            | 4101                                     | 854                                  | 15476                          | 0                                                                 | 16330   |
| Liraglutide           | 3978                                     | 9509                                 | 62587                          | 1010                                                              | 73106   |
| Ulipristal            | 3754                                     | 4012                                 | 920                            | 0                                                                 | 4932    |
| Tigecycline           | 2758                                     | 1339                                 | 6291                           | 11692                                                             | 19322   |
| Methoxy polyethylene  | 2398                                     | 8                                    | 22094                          | 0                                                                 | 22102   |
| Golimumab             | 2297                                     | 1222                                 | 17579                          | 0                                                                 | 18801   |
| Asenapine maleate     | 2294                                     | 0                                    | 2179                           | 0                                                                 | 2179    |
| Sitagliptin           | 2220                                     | 2794                                 | 110745                         | 285                                                               | 113824  |
| Doripenem             | 2117                                     | 267                                  | 2937                           | 0                                                                 | 3204    |
| Ustekinumab           | 1996                                     | 3793                                 | 17080                          | 0                                                                 | 20873   |
| Fesoterodine fumarate | 1935                                     | 182                                  | 23517                          | 0                                                                 | 23699   |
| Entecavir             | 1814                                     | 0                                    | 39787                          | 0                                                                 | 39787   |
| Paliperidone          | 1665                                     | 2548                                 | 35755                          | 4721                                                              | 43024   |
| Micafungin            | 1643                                     | 1105                                 | 39983                          | 275                                                               | 41363   |
| Ranolazine            | 1593                                     | 2945                                 | 5773                           | 1896                                                              | 10614   |
| Exenatide             | 1446                                     | 2810                                 | 417301                         | 145                                                               | 420256  |
| Abatacept             | 1382                                     | 5622                                 | 234605                         | 0                                                                 | 240227  |
| Telbivudine           | 1367                                     | 0                                    | 13590                          | 0                                                                 | 13590   |
| Lacosamide            | 1308                                     | 1133                                 | 29103                          | 0                                                                 | 30236   |
| Etravirine            | 1203                                     | 0                                    | 4881                           | 0                                                                 | 4881    |
| Posaconazole          | 1202                                     | 1949                                 | 1282                           | 1160                                                              | 4391    |
| Rotigotine            | 1163                                     | 4067                                 | 7671                           | 520                                                               | 12258   |
| Tipranavir            | 1159                                     | 0                                    | 1365                           | 36                                                                | 1401    |
| Ranibizumab           | 1139                                     | 20541                                | 36906                          | 32318                                                             | 89765   |
| Rufinamide            | 1097                                     | 288                                  | 886                            | 0                                                                 | 1174    |
| Certolizumab pegol    | 1088                                     | 1200                                 | 33077                          | 3246                                                              | 37523   |
| Sildenafil            | 923                                      | 1339                                 | 16252                          | 0                                                                 | 17591   |
| Anidulafungin         | 857                                      | 792                                  | 2993                           | 34                                                                | 3819    |
| Sorafenib             | 769                                      | 54317                                | 18809                          | 3308                                                              | 76434   |
| Raltegravir           | 699                                      | 83                                   | 31202                          | 0                                                                 | 31285   |
| Nepafenac             | 688                                      | 815                                  | 6812                           | 0                                                                 | 7627    |
| Darunavir             | 637                                      | 0                                    | 39773                          | 0                                                                 | 39773   |

| Drug                     | Population in preapproval pivotal trials | Population in post-marketing studies |                                |                                                                   | Total |
|--------------------------|------------------------------------------|--------------------------------------|--------------------------------|-------------------------------------------------------------------|-------|
|                          |                                          | Another indication                   | Originally-approved indication | Both in originally approved indication and in other(s) indication |       |
| Plerixafor               | 623                                      | 1467                                 | 11644                          | 339                                                               | 13450 |
| Degarelix                | 610                                      | 791                                  | 10020                          | 0                                                                 | 10811 |
| Deferasirox              | 586                                      | 153                                  | 8609                           | 50                                                                | 8812  |
| Dasatinib                | 565                                      | 9267                                 | 9090                           | 963                                                               | 19320 |
| Sunitinib                | 481                                      | 16462                                | 18362                          | 2496                                                              | 37320 |
| Panitumumab              | 461                                      | 5197                                 | 16874                          | 514                                                               | 22585 |
| Maraviroc                | 448                                      | 560                                  | 11397                          | 0                                                                 | 11957 |
| Pazopanib                | 435                                      | 10363                                | 8060                           | 909                                                               | 19332 |
| Tolvaptan                | 418                                      | 12221                                | 356                            | 975                                                               | 13552 |
| Ambrisentan              | 393                                      | 715                                  | 11585                          | 0                                                                 | 12300 |
| Collagenase clostridium  | 374                                      | 3897                                 | 0                              | 0                                                                 | 3897  |
| Lapatinib                | 324                                      | 7678                                 | 37714                          | 489                                                               | 45881 |
| Methylnaltrexone bromide | 321                                      | 1359                                 | 2222                           | 0                                                                 | 3581  |
| Eltrombopag              | 232                                      | 2957                                 | 2533                           | 100                                                               | 5590  |
| Retapamulin              | 210                                      | 267                                  | 4417                           | 135                                                               | 4819  |
| Nilotinib                | 196                                      | 2431                                 | 8531                           | 4695                                                              | 15657 |
| Lenalidomide             | 193                                      | 19105                                | 39873                          | 1827                                                              | 60805 |
| Nelarabine               | 190                                      | 35                                   | 3069                           | 0                                                                 | 3104  |
| Ofatumumab               | 154                                      | 3076                                 | 2595                           | 2317                                                              | 7988  |
| Romiplostim              | 125                                      | 543                                  | 1084                           | 0                                                                 | 1627  |
| Idursulfase              | 96                                       | 0                                    | 408                            | 0                                                                 | 408   |
| Sapropterin              | 88                                       | 1133                                 | 5195                           | 0                                                                 | 6328  |
| Eculizumab               | 87                                       | 3861                                 | 2204                           | 0                                                                 | 6065  |
| Mecasermin               | 70                                       | 623                                  | 4668                           | 0                                                                 | 5291  |
| Riloncept                | 47                                       | 2765                                 | 25                             | 0                                                                 | 2790  |
| Galsulfase               | 39                                       | 0                                    | 269                            | 0                                                                 | 269   |
| Canakinumab              | 31                                       | 15157                                | 261                            | 0                                                                 | 15418 |
| Velaglucerase alfa       | 25                                       | 0                                    | 67                             | 0                                                                 | 67    |
| Alglucidase              | 18                                       | 0                                    | 803                            | 0                                                                 | 803   |

Supplemental file S6 bis: Location of post-marketing studies (sample size by location)

|                         | Location      |        |        |                        |                        |                 |                                 |
|-------------------------|---------------|--------|--------|------------------------|------------------------|-----------------|---------------------------------|
|                         | North America | Europa | Others | North America + Europa | North America + Others | Europa + Others | North America + Europa + Others |
| Abatacept               | 2267          | 2801   | 1575   | 1255                   | 1715                   | 0               | 9390                            |
| Alglucidase             | 633           | 5      | 0      | 83                     | 22                     | 20              | 40                              |
| Aliskiren               | 8269          | 3870   | 5760   | 5467                   | 975                    | 3097            | 33667                           |
| Ambrisentan             | 2128          | 6116   | 196    | 64                     | 524                    | 0               | 2330                            |
| Anidulafungin           | 1115          | 225    | 214    | 0                      | 282                    | 21              | 776                             |
| Asenapine maleate       | 950           | 0      | 0      | 0                      | 0                      |                 | 0                               |
| Canakinumab             | 164           | 320    | 34     | 1037                   | 0                      | 274             | 13569                           |
| Certolizumab pegol      | 7278          | 5383   | 2401   | 3225                   | 271                    | 0               | 6265                            |
| Collagenase clostridium | 1402          | 541    | 79     | 0                      | 1286                   | 0               | 400                             |
| Dabigatran              | 272415        | 47930  | 9639   | 636                    | 0                      | 7096            | 21220                           |
| Darunavir               | 755           | 2880   | 4076   | 12                     | 1213                   | 576             | 2940                            |
| Dasatinib               | 7476          | 2941   | 1139   | 768                    | 195                    | 484             | 5866                            |
| Deferasirox             | 1473          | 1023   | 1148   | 0                      | 0                      | 2506            | 2575                            |
| Degarelix               | 1613          | 5646   | 1522   | 783                    | 0                      | 0               | 1147                            |
| Denosumab               | 1168          | 4547   | 2692   | 427                    | 0                      | 1439            | 16134                           |
| Doripenem               | 82            | 195    | 818    | 52                     | 0                      | 0               | 1911                            |
| Dronedarone             | 480           | 4143   | 279    | 0                      | 0                      | 556             | 5436                            |
| Eculizumab              | 4683          | 447    | 52     | 60                     | 92                     | 80              | 463                             |
| Eltrombopag             | 1486          | 458    | 992    | 82                     | 0                      | 100             | 1059                            |
| Entecavir               | 807           | 1096   | 21848  | 4                      | 200                    | 184             | 14460                           |
| Etravirine              | 857           | 1730   | 570    | 30                     | 671                    | 279             | 536                             |
| Exenatide               | 371779        | 5876   | 10283  | 736                    | 3323                   | 2963            | 25151                           |
| Febuxostat              | 5473          | 0      | 1424   | 0                      | 7500                   | 0               | 744                             |
| Fesoterodine fumarate   | 4555          | 1231   | 2245   | 0                      | 0                      | 794             | 8210                            |

|                          | Location      |        |        |                        |                        |                 |                                 |
|--------------------------|---------------|--------|--------|------------------------|------------------------|-----------------|---------------------------------|
|                          | North America | Europa | Others | North America + Europa | North America + Others | Europa + Others | North America + Europa + Others |
| Galsulfase               | 10            | 0      | 0      | 0                      | 200                    | 0               | 59                              |
| Golimumab                | 5459          | 5031   | 1361   | 706                    | 11                     | 120             | 811                             |
| Idursulfase              | 0             | 0      | 81     | 79                     | 0                      | 108             | 118                             |
| Lacosamide               | 1597          | 4167   | 946    | 1210                   | 0                      | 0               | 3281                            |
| Lapatinib                | 5446          | 9359   | 2989   | 502                    | 1106                   | 876             | 22398                           |
| Lenalidomide             | 22422         | 19825  | 1874   | 1804                   | 1916                   | 1972            | 8846                            |
| Liraglutide              | 15787         | 12960  | 13865  | 717                    | 0                      | 415             | 26892                           |
| Maraviroc                | 1268          | 1849   | 561    | 129                    | 876                    | 186             | 5698                            |
| Mecasermin               | 2073          | 3198   | 0      | 0                      | 0                      | 0               | 0                               |
| Methoxy polyethylene     | 340           | 13375  | 4841   | 0                      | 0                      | 2828            | 718                             |
| Methylnaltrexone bromide | 1968          | 31     | 0      | 0                      | 0                      | 0               | 1462                            |
| Micafungin               | 37521         | 664    | 1518   | 0                      | 84                     | 619             | 836                             |
| Nelarabine               | 95            | 720    | 13     | 0                      | 36                     | 40              | 1900                            |
| Nepafenac                | 5927          | 227    | 1021   | 0                      | 0                      | 0               | 0                               |
| Nilotinib                | 1660          | 4393   | 1964   | 175                    | 512                    | 218             | 2882                            |
| Ofatumumab               | 2401          | 1549   | 20     | 60                     | 14                     | 122             | 3294                            |
| Paliperidone             | 4400          | 1064   | 10125  | 0                      | 838                    | 4753            | 11816                           |
| Panitumumab              | 2888          | 8858   | 164    | 375                    | 0                      | 0               | 1700                            |
| Pazopanib                | 5947          | 5436   | 2684   | 374                    | 207                    | 102             | 4518                            |
| Plerixafor               | 2374          | 850    | 164    | 0                      | 61                     | 46              | 0                               |
| Posaconazole             | 154           | 1370   | 126    | 96                     | 0                      | 0               | 600                             |
| Prasugrel                | 23597         | 42550  | 7015   | 4760                   | 17372                  | 0               | 26550                           |
| Raltegravir              | 3106          | 4949   | 8048   | 366                    | 3156                   | 1173            | 4308                            |
| Ranibizumab              | 17679         | 20576  | 9883   | 694                    | 232                    | 3832            | 33851                           |
| Ranolazine               | 4524          | 551    | 310    | 0                      | 0                      | 0               | 5102                            |

|                    | Location      |        |        |                        |                        |                 |                                 |
|--------------------|---------------|--------|--------|------------------------|------------------------|-----------------|---------------------------------|
|                    | North America | Europa | Others | North America + Europa | North America + Others | Europa + Others | North America + Europa + Others |
| Retapamulin        | 784           | 0      | 3000   | 0                      | 508                    | 465             | 60                              |
| Rilonacept         | 1242          | 30     | 0      | 0                      | 0                      | 244             | 1274                            |
| Romiplostim        | 280           | 119    | 76     | 63                     | 62                     | 0               | 175                             |
| Rotigotine         | 2229          | 3696   | 2553   | 220                    | 601                    | 2197            | 371                             |
| Rufinamide         | 230           | 278    | 366    | 75                     | 0                      | 0               | 0                               |
| Sapropterin        | 5120          | 1018   | 0      | 0                      | 190                    | 0               | 0                               |
| Saxagliptin        | 166072        | 594    | 13757  | 0                      | 501                    | 2670            | 21205                           |
| Silodosin          | 885           | 1196   | 1559   | 0                      | 0                      | 0               | 0                               |
| Sitagliptin        | 5577          | 2079   | 12049  | 164                    | 804                    | 3770            | 21728                           |
| Sorafenib          | 17405         | 13223  | 17312  | 973                    | 2681                   | 3230            | 20954                           |
| Sunitinib          | 8448          | 7676   | 2806   | 2557                   | 2006                   | 167             | 10074                           |
| Telbivudine        | 159           | 132    | 8934   | 0                      | 308                    | 367             | 1790                            |
| Tigecycline        | 473           | 1987   | 9632   | 0                      | 1175                   | 473             | 1588                            |
| Tipranavir         | 71            | 504    | 0      | 0                      | 246                    | 0               | 84                              |
| Tocilizumab        | 2511          | 17868  | 4033   | 1054                   | 228                    | 1270            | 9070                            |
| Tolvaptan          | 1227          | 304    | 3131   | 0                      | 1300                   | 0               | 4500                            |
| Ulipristal         | 855           | 2845   | 51     | 579                    | 60                     | 542             | 0                               |
| Ustekinumab        | 2823          | 2649   | 2004   | 166                    | 0                      | 1290            | 9859                            |
| Varenicline        | 34574         | 67592  | 6523   | 1307                   | 360                    | 0               | 18706                           |
| Velaglycerase alfa | 0             | 50     | 17     | 0                      | 0                      | 0               | 0                               |



Supplemental File S8. Characteristics of industry and non-industry post-marketing studies when only incorporating those whose launch started after the first regulatory approval.

| Characteristics                                                        |                | All<br>(n=6443)    | Industry studies<br>(n=4012) | Non-industry studies<br>(n=2431) |
|------------------------------------------------------------------------|----------------|--------------------|------------------------------|----------------------------------|
| <b>Primary sponsor</b>                                                 | Industry       | 2564 (39.8%)       |                              |                                  |
|                                                                        | NIH            | 244 (3.8%)         |                              |                                  |
|                                                                        | US Fed         | 15 (0.2%)          |                              |                                  |
|                                                                        | Other          | 3620 (56.2%)       |                              |                                  |
| <b>Industry involved either as a primary sponsor or a collaborator</b> |                | 4012 (62.5%)       |                              |                                  |
| <b>No. of post-marketing studies per drug</b>                          | Min/max        | 3/498              |                              |                                  |
|                                                                        | Median [Q1-Q3] | 51 [19-118]        |                              |                                  |
|                                                                        | Mean (SD)      | 93.4 (105.5)       |                              |                                  |
| <b>Population size per drug</b>                                        | Min/max        | 67/1.04E6          |                              |                                  |
|                                                                        | Median [Q1-Q3] | 15212 [4819-36262] |                              |                                  |
|                                                                        | Mean (SD)      | 61719 (166183)     |                              |                                  |

|                                                   |                                                                |              |              |              |
|---------------------------------------------------|----------------------------------------------------------------|--------------|--------------|--------------|
| <b>Therapeutic class according to the ATC</b>     |                                                                |              |              |              |
| Alimentary tract and metabolism                   |                                                                | 809 (12.6%)  | 547 (67.6%)  | 262 (32.4%)  |
| Anti-infectives for systemic use                  |                                                                | 814 (12.6%)  | 495 (60.8%)  | 319 (39.2%)  |
| Antineoplastic and immunomodulating agents        |                                                                | 2900 (45.5%) | 1742 (60.1%) | 1158 (39.9%) |
| Blood and blood forming organs                    |                                                                | 429 (6.7%)   | 261 (60.8%)  | 168 (39.2%)  |
| Nervous system                                    |                                                                | 468 (7.3%)   | 288 (61.5%)  | 180 (38.5%)  |
| Other*                                            |                                                                | 1023 (15.9%) | 679 (66.4%)  | 344 (33.6%)  |
| <b>Study design with respect to primary label</b> | Another indication than the originally approved indication     | 2342 (36.4%) | 1259 (53.8%) | 1083 (46.2%) |
|                                                   | Originally approved indication                                 | 3859 (59.9%) | 2631 (68.2%) | 1228 (31.8%) |
|                                                   | Both the originally approved indication and another indication | 242 (3.7%)   | 122 (50.4%)  | 120 (49.6%)  |
| <b>Study type</b>                                 | Observational                                                  | 703 (10.9%)  | 466 (66.3%)  | 237 (33.7%)  |
|                                                   | Interventional                                                 | 5740 (89.1%) | 3546 (61.8%) | 2194 (38.2%) |

|                      |                |              |              |              |
|----------------------|----------------|--------------|--------------|--------------|
| <b>Randomization</b> | Missing data   | 2393         | 1412         | 981          |
|                      | Yes            | 2950 (72.8%) | 1875 (63.6%) | 1075 (36.4%) |
|                      | No             | 1100 (27.2%) | 725 (65.9%)  | 375 (34.1%)  |
| <b>Study phase</b>   | Missing data   | 1046         | 551          | 495          |
|                      | 0              | 33 (0.6%)    | 12 (36.4%)   | 21 (63.6%)   |
|                      | I              | 886 (16.4%)  | 622 (70.2%)  | 264 (29.8%)  |
|                      | I/II           | 406 (7.5%)   | 235 (57.9%)  | 171 (42.1%)  |
|                      | II             | 1746 (32.4%) | 992 (56.8%)  | 754 (43.2%)  |
|                      | II/III         | 104 (1.9%)   | 49 (47.1%)   | 55 (52.9%)   |
|                      | III            | 1180 (21.9%) | 957 (81.1%)  | 223 (18.9%)  |
|                      | IV             | 1042 (19.3%) | 594 (57.0%)  | 448 (43.0%)  |
| <b>Centers</b>       | Missing data   | 468          | 394          | 74           |
|                      | Min/max        | 1/1616       | 1/1616       | 1/922        |
|                      | Median [Q1-Q3] | 2 [1-12]     | 4 [1-23]     | 1 [1-2]      |
|                      | Mean (SD)      | 19.7 (62.2)  | 26.1 (70.4)  | 9.8 (45.0)   |
| <b>Countries</b>     | Missing data   | 466          | 393          | 73           |
|                      | Min/max        | 1/45         | 1/46         | 1/15         |
|                      | Median [Q1-Q3] | 1 [1-1]      | 1 [1-2]      | 1 [1-1]      |

|                                               |                         |                 |                 |                |
|-----------------------------------------------|-------------------------|-----------------|-----------------|----------------|
|                                               | Mean (SD)               | 2.6 (4.6)       | 3.5 (5.7)       | 1.1 (0.7)      |
| <b>Planned enrollment</b>                     | Missing data            | 14              | 9               | 5              |
|                                               | Min/max                 | 1/904585        | 1/904585        | 1/61050        |
|                                               | Median [Q1-Q3]          | 60 [27-180]     | 70 [29-241]     | 48 [24-100]    |
|                                               | Mean (SD)               | 662.4 (13044.2) | 966.4 (16495.6) | 160.9 (1293.2) |
| <b>Status at the time of data exportation</b> | Not yet recruiting      | 319 (4.8%)      | 136 (42.6%)     | 183 (57.4%)    |
|                                               | Recruiting              | 1888 (29.3%)    | 883 (46.8%)     | 1005 (53.2%)   |
|                                               | Active, not recruiting  | 991 (15.4%)     | 619 (62.5%)     | 372 (37.5%)    |
|                                               | Enrolling by invitation | 64 (1.0%)       | 42 (65.6%)      | 22 (34.4%)     |
|                                               | Completed               | 2705 (42.0%)    | 2000 (73.9%)    | 705 (26.1%)    |
|                                               | Terminated              | 476 (7.4%)      | 332 (69.8%)     | 144 (30.3%)    |

NIH, US National Institutes of Health

\*includes cardiovascular system, dermatological, genitourinary system and sex hormones, musculoskeletal system, sensory organs, systemic hormonal preparations, excluding sex hormones, and other

eTable. Planned enrollment of post-marketing trials by industry and non-industry funding for indications targeted in trials.

| Indication                                                            | Industry funding |                                                             | Non-industry funding |                                                            |
|-----------------------------------------------------------------------|------------------|-------------------------------------------------------------|----------------------|------------------------------------------------------------|
|                                                                       | No. of trials    | Planned enrollment                                          | No. of trials        | Planned enrollment                                         |
| <b>Originally approved indication</b>                                 | 2742             | Median [Q1-Q3]: 100 [33-323]<br>Mean (SD): 1322.0 (19921.8) | 1251                 | Median [Q1-Q3]: 60 [29.5-150]<br>Mean (SD): 230.9 (1771.2) |
| <b>Other indication(s)</b>                                            | 1310             | Median [Q1-Q3]: 45 [24-128]<br>Mean (SD): 167.7 (SD: 544.1) | 1131                 | Median [Q1-Q3]: 40 [21-70]<br>Mean (SD): 72.9 (148.0)      |
| <b>Both the originally approved indication and another indication</b> | 124              | Median [Q1-Q3]: 60 [30-224]<br>Mean (SD): 765.2 (2961.8)    | 121                  | Median [Q1-Q3]: 50 [30-120]<br>Mean (SD): 218.1 (934.9)    |

Data were missing for 9 industry-funded trials and 5 other trials.
