# Supplementary material for: Postmarketing studies for novel drugs approved by both the FDA and EMA between 2005 and 2010: a cross-sectional study
Source: PubMed Central journal article supplement — BMJ Open. 2017 Dec 21;7(12):e018587. doi: 10.1136/bmjopen-2017-018587 (PMC5778291; doi:10.1136/bmjopen-2017-018587), 2017-12-21

Supplemental Material 1. Sample construction of relevant post-marketing trials related to all 69 novel drugs both approved by the FDA and the EMA between 2005 and 2010, after exclusion of everolimus and temsirolimus

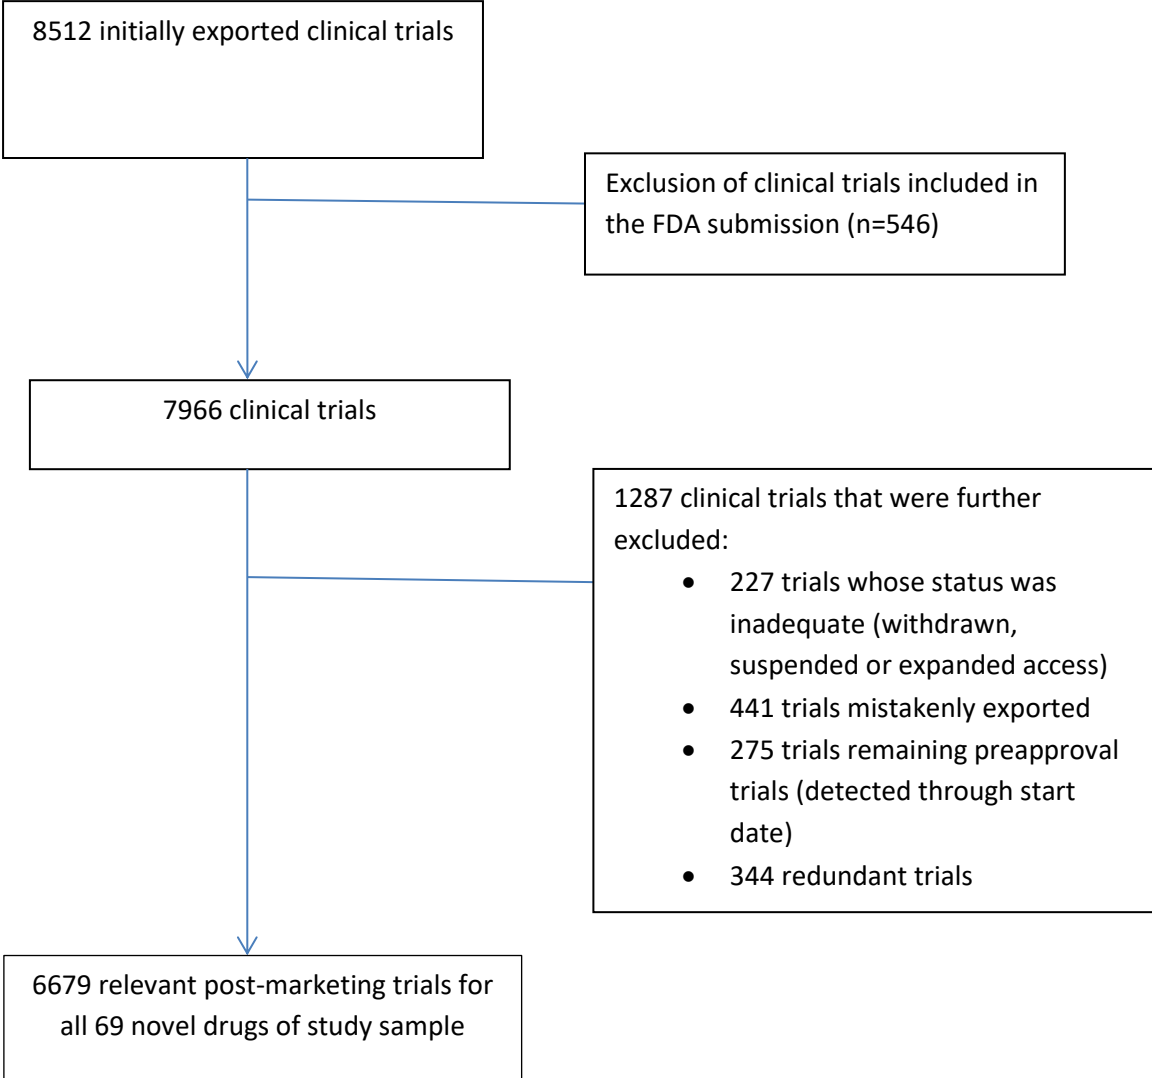

Supplement: bmjopen-2017-018587supp001.pdf [file bmjopen-2017-018587supp001.pdf]
