# Supplementary material for: Postmarketing studies for novel drugs approved by both the FDA and EMA between 2005 and 2010: a cross-sectional study
Source: PubMed Central journal article supplement — BMJ Open. 2017 Dec 21;7(12):e018587. doi: 10.1136/bmjopen-2017-018587 (PMC5778291; doi:10.1136/bmjopen-2017-018587), 2017-12-21
Supplement: bmjopen-2017-018587supp002.pdf [file bmjopen-2017-018587supp002.pdf]

Supplemental File S8. Characteristics of industry and non-industry post-marketing studies when only incorporating those whose launch started after the first regulatory approval.

| <b>Characteristics</b>                                                 |                | <b>All<br/>(n=6443)</b> | <b>Industry studies<br/>(n=4012)</b> | <b>Non-industry studies<br/>(n=2431)</b> |
|------------------------------------------------------------------------|----------------|-------------------------|--------------------------------------|------------------------------------------|
| <b>Primary sponsor</b>                                                 | Industry       | 2564 (39.8%)            |                                      |                                          |
|                                                                        | NIH            | 244 (3.8%)              |                                      |                                          |
|                                                                        | US Fed         | 15 (0.2%)               |                                      |                                          |
|                                                                        | Other          | 3620 (56.2%)            |                                      |                                          |
| <b>Industry involved either as a primary sponsor or a collaborator</b> |                | 4012 (62.5%)            |                                      |                                          |
| <b>No. of post-marketing studies per drug</b>                          | Min/max        | 3/498                   |                                      |                                          |
|                                                                        | Median [Q1-Q3] | 51 [19-118]             |                                      |                                          |
|                                                                        | Mean (SD)      | 93.4 (105.5)            |                                      |                                          |
| <b>Population size per drug</b>                                        | Min/max        | 67/1.04E6               |                                      |                                          |
|                                                                        | Median [Q1-Q3] | 15212 [4819-36262]      |                                      |                                          |
|                                                                        | Mean (SD)      | 61719 (166183)          |                                      |                                          |

|                                                   |                                                                |              |              |              |
|---------------------------------------------------|----------------------------------------------------------------|--------------|--------------|--------------|
| <b>Therapeutic class according to the ATC</b>     |                                                                |              |              |              |
| Alimentary tract and metabolism                   |                                                                | 809 (12.6%)  | 547 (67.6%)  | 262 (32.4%)  |
| Anti-infectives for systemic use                  |                                                                | 814 (12.6%)  | 495 (60.8%)  | 319 (39.2%)  |
| Antineoplastic and immunomodulating agents        |                                                                | 2900 (45.5%) | 1742 (60.1%) | 1158 (39.9%) |
| Blood and blood forming organs                    |                                                                | 429 (6.7%)   | 261 (60.8%)  | 168 (39.2%)  |
| Nervous system                                    |                                                                | 468 (7.3%)   | 288 (61.5%)  | 180 (38.5%)  |
| Other*                                            |                                                                | 1023 (15.9%) | 679 (66.4%)  | 344 (33.6%)  |
| <b>Study design with respect to primary label</b> | Another indication than the originally approved indication     | 2342 (36.4%) | 1259 (53.8%) | 1083 (46.2%) |
|                                                   | Originally approved indication                                 | 3859 (59.9%) | 2631 (68.2%) | 1228 (31.8%) |
|                                                   | Both the originally approved indication and another indication | 242 (3.7%)   | 122 (50.4%)  | 120 (49.6%)  |
| <b>Study type</b>                                 | Observational                                                  | 703 (10.9%)  | 466 (66.3%)  | 237 (33.7%)  |
|                                                   | Interventional                                                 | 5740 (89.1%) | 3546 (61.8%) | 2194 (38.2%) |

|                      |                |              |              |              |
|----------------------|----------------|--------------|--------------|--------------|
| <b>Randomization</b> | Missing data   | 2393         | 1412         | 981          |
|                      | Yes            | 2950 (72.8%) | 1875 (63.6%) | 1075 (36.4%) |
|                      | No             | 1100 (27.2%) | 725 (65.9%)  | 375 (34.1%)  |
| <b>Study phase</b>   | Missing data   | 1046         | 551          | 495          |
|                      | 0              | 33 (0.6%)    | 12 (36.4%)   | 21 (63.6%)   |
|                      | I              | 886 (16.4%)  | 622 (70.2%)  | 264 (29.8%)  |
|                      | I/II           | 406 (7.5%)   | 235 (57.9%)  | 171 (42.1%)  |
|                      | II             | 1746 (32.4%) | 992 (56.8%)  | 754 (43.2%)  |
|                      | II/III         | 104 (1.9%)   | 49 (47.1%)   | 55 (52.9%)   |
|                      | III            | 1180 (21.9%) | 957 (81.1%)  | 223 (18.9%)  |
|                      | IV             | 1042 (19.3%) | 594 (57.0%)  | 448 (43.0%)  |
| <b>Centers</b>       | Missing data   | 468          | 394          | 74           |
|                      | Min/max        | 1/1616       | 1/1616       | 1/922        |
|                      | Median [Q1-Q3] | 2 [1-12]     | 4 [1-23]     | 1 [1-2]      |
|                      | Mean (SD)      | 19.7 (62.2)  | 26.1 (70.4)  | 9.8 (45.0)   |
| <b>Countries</b>     | Missing data   | 466          | 393          | 73           |
|                      | Min/max        | 1/45         | 1/46         | 1/15         |
|                      | Median [Q1-Q3] | 1 [1-1]      | 1 [1-2]      | 1 [1-1]      |

|                                               |                         |                 |                 |                |
|-----------------------------------------------|-------------------------|-----------------|-----------------|----------------|
|                                               | Mean (SD)               | 2.6 (4.6)       | 3.5 (5.7)       | 1.1 (0.7)      |
| <b>Planned enrollment</b>                     | Missing data            | 14              | 9               | 5              |
|                                               | Min/max                 | 1/904585        | 1/904585        | 1/61050        |
|                                               | Median [Q1-Q3]          | 60 [27-180]     | 70 [29-241]     | 48 [24-100]    |
|                                               | Mean (SD)               | 662.4 (13044.2) | 966.4 (16495.6) | 160.9 (1293.2) |
| <b>Status at the time of data exportation</b> | Not yet recruiting      | 319 (4.8%)      | 136 (42.6%)     | 183 (57.4%)    |
|                                               | Recruiting              | 1888 (29.3%)    | 883 (46.8%)     | 1005 (53.2%)   |
|                                               | Active, not recruiting  | 991 (15.4%)     | 619 (62.5%)     | 372 (37.5%)    |
|                                               | Enrolling by invitation | 64 (1.0%)       | 42 (65.6%)      | 22 (34.4%)     |
|                                               | Completed               | 2705 (42.0%)    | 2000 (73.9%)    | 705 (26.1%)    |
|                                               | Terminated              | 476 (7.4%)      | 332 (69.8%)     | 144 (30.3%)    |

NIH, US National Institutes of Health

\*includes cardiovascular system, dermatological, genitourinary system and sex hormones, musculoskeletal system, sensory organs, systemic hormonal preparations, excluding sex hormones, and other
