# Supplementary material for: Postmarketing studies for novel drugs approved by both the FDA and EMA between 2005 and 2010: a cross-sectional study
Source: PubMed Central journal article supplement — BMJ Open. 2017 Dec 21;7(12):e018587. doi: 10.1136/bmjopen-2017-018587 (PMC5778291; doi:10.1136/bmjopen-2017-018587), 2017-12-21
Supplement: bmjopen-2017-018587supp009.pdf [file bmjopen-2017-018587supp009.pdf]

eTable. Planned enrollment of post-marketing trials by industry and non-industry funding for indications targeted in trials.

| Indication                                                            | Industry funding |                                                             | Non-industry funding |                                                            |
|-----------------------------------------------------------------------|------------------|-------------------------------------------------------------|----------------------|------------------------------------------------------------|
|                                                                       | No. of trials    | Planned enrollment                                          | No. of trials        | Planned enrollment                                         |
| <b>Originally approved indication</b>                                 | 2742             | Median [Q1-Q3]: 100 [33-323]<br>Mean (SD): 1322.0 (19921.8) | 1251                 | Median [Q1-Q3]: 60 [29.5-150]<br>Mean (SD): 230.9 (1771.2) |
| <b>Other indication(s)</b>                                            | 1310             | Median [Q1-Q3]: 45 [24-128]<br>Mean (SD): 167.7 (SD: 544.1) | 1131                 | Median [Q1-Q3]: 40 [21-70]<br>Mean (SD): 72.9 (148.0)      |
| <b>Both the originally approved indication and another indication</b> | 124              | Median [Q1-Q3]: 60 [30-224]<br>Mean (SD): 765.2 (2961.8)    | 121                  | Median [Q1-Q3]: 50 [30-120]<br>Mean (SD): 218.1 (934.9)    |

Data were missing for 9 industry-funded trials and 5 other trials.
